# Supplementary material
Source: publisher figshare collection journal article supplement (https://gsajournals.figshare.com/ndownloader/files/28864905)
Supplement: Supplementary file 1 [file 28864905]

## Sheet: Table S9
Table S9: Cluster membership with GO annotation.
Sequence	cluster	GO-Annotation
maker-tulip_contig_831_pilon_pilon-augustus-gene-1.2-mRNA-1	1	GO:0003824
augustus_masked-tulip_contig_199_pilon_pilon-processed-gene-4.21-mRNA-1	1
maker-tulip_contig_331_pilon_pilon-augustus-gene-3.25-mRNA-1	1
augustus_masked-tulip_contig_412_pilon_pilon-processed-gene-0.64-mRNA-1	1
maker-tulip_contig_199_pilon_pilon-augustus-gene-4.112-mRNA-1	1
maker-tulip_contig_145_pilon_pilon-augustus-gene-6.58-mRNA-1	1	GO:0003676,GO:0016787,GO:0046872
maker-tulip_contig_199_pilon_pilon-augustus-gene-4.87-mRNA-1	1
maker-tulip_contig_247_pilon_pilon-augustus-gene-2.39-mRNA-1	1	GO:0006629,GO:0016788
maker-tulip_contig_34_pilon_pilon-augustus-gene-0.126-mRNA-1	1	GO:0004252,GO:0006508
maker-tulip_contig_559_pilon_pilon-augustus-gene-0.3-mRNA-1	1	GO:0003824,GO:0005975,GO:0003824,GO:0005975,GO:0043169
augustus_masked-tulip_contig_559_pilon_pilon-processed-gene-0.29-mRNA-1	1	GO:0003824,GO:0005975,GO:0003824,GO:0005975,GO:0043169
augustus_masked-tulip_contig_339_pilon_pilon-processed-gene-0.7-mRNA-1	1	GO:0004252,GO:0006508
maker-tulip_contig_916_pilon_pilon-augustus-gene-1.16-mRNA-1	1	GO:0006508,GO:0008237,GO:0008270
augustus_masked-tulip_contig_125_pilon_pilon-processed-gene-0.403-mRNA-1	1	GO:0004252,GO:0006508
maker-tulip_contig_623_pilon_pilon-augustus-gene-5.48-mRNA-1	1	GO:0006629,GO:0052689
maker-tulip_contig_199_pilon_pilon-augustus-gene-4.47-mRNA-1	1
maker-tulip_contig_640_pilon_pilon-augustus-gene-2.22-mRNA-1	1
maker-tulip_contig_451_pilon_pilon-augustus-gene-1.45-mRNA-1	1	GO:0016491,GO:0016620,GO:0055114,GO:0016491,GO:0055114
maker-tulip_contig_907_pilon_pilon-augustus-gene-8.20-mRNA-1	1	GO:0003677,GO:0016491,GO:0003677,GO:0006355
augustus_masked-tulip_contig_559_pilon_pilon-processed-gene-3.33-mRNA-1	1	GO:0016491
maker-tulip_contig_1_pilon_pilon-augustus-gene-4.4-mRNA-1	1	GO:0004553,GO:0005975
augustus_masked-tulip_contig_42_pilon_pilon-processed-gene-0.13-mRNA-1	1	GO:0005506,GO:0016705,GO:0020037,GO:0055114,GO:0016705,GO:0055114
maker-tulip_contig_220_pilon_pilon-augustus-gene-0.28-mRNA-1	1	GO:0005549
maker-tulip_contig_407_pilon_pilon-augustus-gene-8.38-mRNA-1	1	GO:0008289
maker-tulip_contig_407_pilon_pilon-augustus-gene-5.64-mRNA-1	1
maker-tulip_contig_623_pilon_pilon-augustus-gene-5.101-mRNA-1	1	GO:0006629,GO:0052689
maker-tulip_contig_666_pilon_pilon-augustus-gene-2.21-mRNA-1	1	GO:0005515
maker-tulip_contig_230_pilon_pilon-augustus-gene-0.51-mRNA-1	1	GO:0004252,GO:0006508
augustus_masked-tulip_contig_82_pilon_pilon-processed-gene-1.1-mRNA-1	1
maker-tulip_contig_133_pilon_pilon-augustus-gene-1.26-mRNA-1	1	GO:0004089,GO:0008270
maker-tulip_contig_839_pilon_pilon-augustus-gene-1.32-mRNA-1	1
maker-tulip_contig_325_pilon_pilon-augustus-gene-0.30-mRNA-1	1
maker-tulip_contig_745_pilon_pilon-augustus-gene-3.6-mRNA-1	1
augustus_masked-tulip_contig_289_pilon_pilon-processed-gene-0.7-mRNA-1	1	GO:0016758
maker-tulip_contig_252_pilon_pilon-augustus-gene-0.9-mRNA-1	1	GO:0005201
maker-tulip_contig_829_pilon_pilon-augustus-gene-1.51-mRNA-1	1	GO:0003676,GO:0005515
maker-tulip_contig_516_pilon_pilon-augustus-gene-3.14-mRNA-1	1	GO:0005506,GO:0016705,GO:0020037,GO:0055114
maker-tulip_contig_839_pilon_pilon-augustus-gene-1.48-mRNA-1	1
maker-tulip_contig_559_pilon_pilon-augustus-gene-3.16-mRNA-1	1	GO:0016491
maker-tulip_contig_112_pilon_pilon-augustus-gene-2.5-mRNA-1	1	GO:0006508,GO:0008236
maker-tulip_contig_429_pilon_pilon-augustus-gene-0.42-mRNA-1	1	GO:0004185,GO:0006508
maker-tulip_contig_839_pilon_pilon-augustus-gene-1.50-mRNA-1	1
maker-tulip_contig_81_pilon_pilon-augustus-gene-1.10-mRNA-1	1	GO:0004181,GO:0006508,GO:0008270
augustus_masked-tulip_contig_435_pilon_pilon-processed-gene-0.13-mRNA-1	1	GO:0016758
maker-tulip_contig_441_pilon_pilon-augustus-gene-1.184-mRNA-1	1	GO:0052689
augustus_masked-tulip_contig_125_pilon_pilon-processed-gene-0.402-mRNA-1	1	GO:0004252,GO:0006508
augustus_masked-tulip_contig_450_pilon_pilon-processed-gene-1.21-mRNA-1	1
augustus_masked-tulip_contig_829_pilon_pilon-processed-gene-0.24-mRNA-1	1	GO:0003824,GO:0005975
maker-tulip_contig_339_pilon_pilon-augustus-gene-1.6-mRNA-1	1	GO:0004252,GO:0006508
maker-tulip_contig_673_pilon_pilon-augustus-gene-0.66-mRNA-1	1	GO:0005215,GO:0016021,GO:0055085,GO:0016021,GO:0022857,GO:0055085
augustus_masked-tulip_contig_133_pilon_pilon-processed-gene-1.19-mRNA-1	1
augustus_masked-tulip_contig_441_pilon_pilon-processed-gene-9.11-mRNA-1	1
augustus_masked-tulip_contig_931_pilon_pilon-processed-gene-1.8-mRNA-1	1	GO:0006535
augustus_masked-tulip_contig_167_pilon_pilon-processed-gene-0.3-mRNA-1	1
augustus_masked-tulip_contig_247_pilon_pilon-processed-gene-2.176-mRNA-1	1
augustus_masked-tulip_contig_247_pilon_pilon-processed-gene-2.175-mRNA-1	1
maker-tulip_contig_516_pilon_pilon-augustus-gene-3.56-mRNA-1	1	GO:0003824
maker-tulip_contig_167_pilon_pilon-augustus-gene-0.32-mRNA-1	1
maker-tulip_contig_123_pilon_pilon-augustus-gene-0.46-mRNA-1	1	GO:0004046,GO:0005737,GO:0006520,GO:0016787,GO:0006508,GO:0008237
maker-tulip_contig_479_pilon_pilon-augustus-gene-4.11-mRNA-1	1	GO:0016614,GO:0050660,GO:0055114,GO:0016614,GO:0055114
maker-tulip_contig_666_pilon_pilon-augustus-gene-0.1-mRNA-1	1	GO:0003677,GO:0008270
maker-tulip_contig_309_pilon_pilon-augustus-gene-0.60-mRNA-1	1
maker-tulip_contig_711_pilon_pilon-augustus-gene-2.35-mRNA-1	1	GO:0005524,GO:0016021,GO:0005524,GO:0016887,GO:0005524,GO:0016021,GO:0042626,GO:0055085
maker-tulip_contig_33_pilon_pilon-augustus-gene-4.28-mRNA-1	1
maker-tulip_contig_81_pilon_pilon-augustus-gene-1.13-mRNA-1	1	GO:0004180,GO:0006508,GO:0004181,GO:0006508,GO:0008270
maker-tulip_contig_519_pilon_pilon-augustus-gene-0.1-mRNA-1	1	GO:0003824,GO:0016791
maker-tulip_contig_334_pilon_pilon-augustus-gene-2.6-mRNA-1	1
maker-tulip_contig_690_pilon_pilon-augustus-gene-4.28-mRNA-1	1	GO:0003824,GO:0005975
maker-tulip_contig_586_pilon_pilon-augustus-gene-3.9-mRNA-1	1
maker-tulip_contig_474_pilon_pilon-augustus-gene-2.8-mRNA-1	1	GO:0003824,GO:0009058,GO:0030170
maker-tulip_contig_868_pilon_pilon-augustus-gene-0.43-mRNA-1	1	GO:0005215,GO:0016021,GO:0055085,GO:0016021,GO:0022857,GO:0055085
maker-tulip_contig_640_pilon_pilon-augustus-gene-1.27-mRNA-1	1
augustus_masked-tulip_contig_307_pilon_pilon-processed-gene-1.44-mRNA-1	1	GO:0016747
maker-tulip_contig_60_pilon_pilon-augustus-gene-0.33-mRNA-1	1
maker-tulip_contig_37_pilon_pilon-augustus-gene-0.24-mRNA-1	1	GO:0016021,GO:0022857,GO:0055085
maker-tulip_contig_781_pilon_pilon-augustus-gene-5.5-mRNA-1	1
maker-tulip_contig_224_pilon_pilon-augustus-gene-2.22-mRNA-1	1	GO:0004181,GO:0006508,GO:0008270
augustus_masked-tulip_contig_110_pilon_pilon-processed-gene-0.24-mRNA-1	1
maker-tulip_contig_125_pilon_pilon-augustus-gene-0.326-mRNA-1	1	GO:0004252,GO:0006508
maker-tulip_contig_916_pilon_pilon-augustus-gene-2.12-mRNA-1	1	GO:0006508,GO:0008237,GO:0008270
augustus_masked-tulip_contig_718_pilon_pilon-processed-gene-2.22-mRNA-1	1
maker-tulip_contig_360_pilon_pilon-augustus-gene-2.68-mRNA-1	1
maker-tulip_contig_507_pilon_pilon-augustus-gene-0.83-mRNA-1	1	GO:0004553,GO:0005975
augustus_masked-tulip_contig_796_pilon_pilon-processed-gene-0.2-mRNA-1	1	GO:0016021,GO:0022857,GO:0055085
augustus_masked-tulip_contig_916_pilon_pilon-processed-gene-2.193-mRNA-1	1	GO:0006508,GO:0008237,GO:0008270
maker-tulip_contig_125_pilon_pilon-augustus-gene-0.322-mRNA-1	1	GO:0004252,GO:0006508
maker-tulip_contig_1_pilon_pilon-augustus-gene-3.9-mRNA-1	1	GO:0005215,GO:0016021,GO:0055085,GO:0016021,GO:0022857,GO:0055085
maker-tulip_contig_192_pilon_pilon-augustus-gene-1.87-mRNA-1	1
maker-tulip_contig_125_pilon_pilon-augustus-gene-0.90-mRNA-1	1	GO:0004252,GO:0006508
augustus_masked-tulip_contig_447_pilon_pilon-processed-gene-0.1-mRNA-1	1
maker-tulip_contig_640_pilon_pilon-augustus-gene-2.21-mRNA-1	1
maker-tulip_contig_868_pilon_pilon-augustus-gene-0.18-mRNA-1	1	GO:0004553,GO:0005975
maker-tulip_contig_199_pilon_pilon-augustus-gene-4.95-mRNA-1	1
augustus_masked-tulip_contig_44_pilon_pilon-processed-gene-6.12-mRNA-1	1
augustus_masked-tulip_contig_112_pilon_pilon-processed-gene-2.51-mRNA-1	1	GO:0005506,GO:0016705,GO:0020037,GO:0055114,GO:0016705,GO:0055114
augustus_masked-tulip_contig_112_pilon_pilon-processed-gene-2.57-mRNA-1	1	GO:0005506,GO:0016705,GO:0020037,GO:0055114,GO:0016705,GO:0055114
maker-tulip_contig_56_pilon_pilon-augustus-gene-0.20-mRNA-1	1
maker-tulip_contig_278_pilon_pilon-augustus-gene-0.24-mRNA-1	1	GO:0005198,GO:0005576
augustus_masked-tulip_contig_407_pilon_pilon-processed-gene-9.16-mRNA-1	1
augustus_masked-tulip_contig_674_pilon_pilon-processed-gene-3.23-mRNA-1	1	GO:0005506,GO:0016705,GO:0020037,GO:0055114,GO:0016705,GO:0055114
maker-tulip_contig_145_pilon_pilon-augustus-gene-1.3-mRNA-1	1
maker-tulip_contig_774_pilon_pilon-augustus-gene-0.100-mRNA-1	1	GO:0016021,GO:0033227,GO:0051033
maker-tulip_contig_3_pilon_pilon-augustus-gene-4.34-mRNA-1	1
maker-tulip_contig_283_pilon_pilon-augustus-gene-1.11-mRNA-1	1	GO:0005506,GO:0008610,GO:0016491,GO:0055114
maker-tulip_contig_212_pilon_pilon-augustus-gene-0.21-mRNA-1	1	GO:0016747
maker-tulip_contig_360_pilon_pilon-augustus-gene-2.69-mRNA-1	1
maker-tulip_contig_242_pilon_pilon-augustus-gene-0.17-mRNA-1	1
augustus_masked-tulip_contig_378_pilon_pilon-processed-gene-0.3-mRNA-1	1
maker-tulip_contig_586_pilon_pilon-augustus-gene-3.15-mRNA-1	1
augustus_masked-tulip_contig_327_pilon_pilon-processed-gene-10.23-mRNA-1	1	GO:0005515
maker-tulip_contig_583_pilon_pilon-augustus-gene-1.24-mRNA-1	1
maker-tulip_contig_586_pilon_pilon-augustus-gene-4.33-mRNA-1	1
maker-tulip_contig_402_pilon_pilon-augustus-gene-2.47-mRNA-1	1	GO:0006508,GO:0008236
maker-tulip_contig_224_pilon_pilon-augustus-gene-2.44-mRNA-1	1	GO:0004181,GO:0006508,GO:0008270
maker-tulip_contig_519_pilon_pilon-augustus-gene-0.10-mRNA-1	1	GO:0003824,GO:0016791
maker-tulip_contig_334_pilon_pilon-augustus-gene-3.31-mRNA-1	1	GO:0004180,GO:0006508,GO:0004181,GO:0006508,GO:0008270
maker-tulip_contig_690_pilon_pilon-augustus-gene-4.27-mRNA-1	1	GO:0003824,GO:0005975
maker-tulip_contig_109_pilon_pilon-augustus-gene-1.18-mRNA-1	1	GO:0052689
maker-tulip_contig_81_pilon_pilon-augustus-gene-2.14-mRNA-1	1	GO:0004180,GO:0006508,GO:0004181,GO:0006508,GO:0008270
maker-tulip_contig_745_pilon_pilon-augustus-gene-3.8-mRNA-1	1
maker-tulip_contig_31_pilon_pilon-augustus-gene-1.52-mRNA-1	1
augustus_masked-tulip_contig_400_pilon_pilon-processed-gene-0.22-mRNA-1	1
augustus_masked-tulip_contig_474_pilon_pilon-processed-gene-0.127-mRNA-1	1	GO:0004348,GO:0006665
augustus_masked-tulip_contig_44_pilon_pilon-processed-gene-6.9-mRNA-1	1
augustus_masked-tulip_contig_618_pilon_pilon-processed-gene-0.3-mRNA-1	1	GO:0003676,GO:0003723
augustus_masked-tulip_contig_15_pilon_pilon-processed-gene-0.15-mRNA-1	1	GO:0005515,GO:0007165
maker-tulip_contig_130_pilon_pilon-augustus-gene-0.28-mRNA-1	1	GO:0005328,GO:0005328,GO:0006836,GO:0016021
maker-tulip_contig_211_pilon_pilon-augustus-gene-4.91-mRNA-1	1	GO:0004143,GO:0007165,GO:0035556
augustus_masked-tulip_contig_44_pilon_pilon-processed-gene-6.11-mRNA-1	1
maker-tulip_contig_687_pilon_pilon-augustus-gene-0.22-mRNA-1	1
maker-tulip_contig_812_pilon_pilon-augustus-gene-2.41-mRNA-1	1	GO:0016021
maker-tulip_contig_66_pilon_pilon-augustus-gene-1.16-mRNA-1	1	GO:0003676
maker-tulip_contig_702_pilon_pilon-augustus-gene-0.44-mRNA-1	1	GO:0004970,GO:0016020,GO:0005216,GO:0006811,GO:0016020,GO:0038023
augustus_masked-tulip_contig_807_pilon_pilon-processed-gene-0.9-mRNA-1	1	GO:0006629,GO:0016717,GO:0055114
maker-tulip_contig_640_pilon_pilon-augustus-gene-2.8-mRNA-1	1	GO:0016021,GO:0055085
maker-tulip_contig_711_pilon_pilon-augustus-gene-2.65-mRNA-1	1	GO:0004364,GO:0005737,GO:0005515
maker-tulip_contig_837_pilon_pilon-augustus-gene-7.30-mRNA-1	1
augustus_masked-tulip_contig_339_pilon_pilon-processed-gene-2.18-mRNA-1	1	GO:0016021,GO:0055085
maker-tulip_contig_610_pilon_pilon-augustus-gene-0.33-mRNA-1	1	GO:0005515
maker-tulip_contig_351_pilon_pilon-augustus-gene-1.41-mRNA-1	1	GO:0005576,GO:0006030,GO:0008061,GO:0006030,GO:0008061
maker-tulip_contig_111_pilon_pilon-augustus-gene-0.47-mRNA-1	1
maker-tulip_contig_567_pilon_pilon-augustus-gene-0.0-mRNA-1	1	GO:0005506,GO:0016705,GO:0020037,GO:0055114
maker-tulip_contig_378_pilon_pilon-augustus-gene-3.7-mRNA-1	1	GO:0005506,GO:0016705,GO:0020037,GO:0055114
augustus_masked-tulip_contig_224_pilon_pilon-processed-gene-2.18-mRNA-1	1	GO:0004181,GO:0006508,GO:0008270
maker-tulip_contig_407_pilon_pilon-augustus-gene-9.76-mRNA-1	1
augustus_masked-tulip_contig_339_pilon_pilon-processed-gene-0.4-mRNA-1	1	GO:0004252,GO:0006508
maker-tulip_contig_307_pilon_pilon-augustus-gene-1.170-mRNA-1	1
augustus_masked-tulip_contig_34_pilon_pilon-processed-gene-0.9-mRNA-1	1	GO:0004252,GO:0006508
maker-tulip_contig_125_pilon_pilon-augustus-gene-0.27-mRNA-1	1	GO:0004252,GO:0006508
maker-tulip_contig_628_pilon_pilon-augustus-gene-0.4-mRNA-1	1	GO:0046983
maker-tulip_contig_360_pilon_pilon-augustus-gene-2.70-mRNA-1	1
augustus_masked-tulip_contig_519_pilon_pilon-processed-gene-0.37-mRNA-1	1	GO:0003824,GO:0016791
augustus_masked-tulip_contig_407_pilon_pilon-processed-gene-9.39-mRNA-1	1
maker-tulip_contig_287_pilon_pilon-augustus-gene-1.29-mRNA-1	1	GO:0004252,GO:0005509,GO:0007596,GO:0004252,GO:0006508
augustus_masked-tulip_contig_597_pilon_pilon-processed-gene-3.63-mRNA-1	1	GO:0005737,GO:0032440,GO:0047522,GO:0055114,GO:0055114,GO:0016491
maker-tulip_contig_280_pilon_pilon-augustus-gene-2.19-mRNA-1	1
maker-tulip_contig_687_pilon_pilon-augustus-gene-0.21-mRNA-1	1
augustus_masked-tulip_contig_701_pilon_pilon-processed-gene-0.38-mRNA-1	1	GO:0003824,GO:0005975
augustus_masked-tulip_contig_148_pilon_pilon-processed-gene-0.54-mRNA-1	1
maker-tulip_contig_839_pilon_pilon-augustus-gene-1.51-mRNA-1	1
augustus_masked-tulip_contig_597_pilon_pilon-processed-gene-3.64-mRNA-1	1	GO:0005737,GO:0032440,GO:0047522,GO:0055114,GO:0055114,GO:0016491
maker-tulip_contig_674_pilon_pilon-augustus-gene-3.13-mRNA-1	1	GO:0004497,GO:0005506,GO:0020037,GO:0055114,GO:0016705,GO:0055114,GO:0005506,GO:0016705,GO:0020037,GO:0055114
maker-tulip_contig_701_pilon_pilon-augustus-gene-0.13-mRNA-1	1	GO:0003824,GO:0005975
maker-tulip_contig_609_pilon_pilon-augustus-gene-0.29-mRNA-1	1	GO:0004222,GO:0006508,GO:0008237,GO:0006508,GO:0008237,GO:0008270
maker-tulip_contig_821_pilon_pilon-augustus-gene-0.5-mRNA-1	1	GO:0004252,GO:0006508
maker-tulip_contig_228_pilon_pilon-augustus-gene-1.55-mRNA-1	1	GO:0004161,GO:0004337,GO:0033384,GO:0045337,GO:0008299
maker-tulip_contig_37_pilon_pilon-augustus-gene-1.10-mRNA-1	1
maker-tulip_contig_872_pilon_pilon-augustus-gene-0.83-mRNA-1	1
maker-tulip_contig_916_pilon_pilon-augustus-gene-2.8-mRNA-1	1	GO:0006508,GO:0008237,GO:0008270
maker-tulip_contig_334_pilon_pilon-augustus-gene-3.15-mRNA-1	1	GO:0004180,GO:0006508,GO:0004181,GO:0006508,GO:0008270
augustus_masked-tulip_contig_654_pilon_pilon-processed-gene-0.0-mRNA-1	1	GO:0004000,GO:0005615,GO:0006154,GO:0019239,GO:0005615
maker-tulip_contig_837_pilon_pilon-augustus-gene-7.35-mRNA-1	1	GO:0016491
maker-tulip_contig_289_pilon_pilon-augustus-gene-0.36-mRNA-1	1	GO:0000166,GO:0016788,GO:0046872,GO:0016787,GO:0009166,GO:0016787
augustus_masked-tulip_contig_446_pilon_pilon-processed-gene-0.30-mRNA-1	1	GO:0005506,GO:0016705,GO:0020037,GO:0055114,GO:0016705,GO:0055114
augustus_masked-tulip_contig_1_pilon_pilon-processed-gene-2.5-mRNA-1	1	GO:0005044,GO:0016020,GO:0016020,GO:0005507,GO:0016641,GO:0055114
maker-tulip_contig_674_pilon_pilon-augustus-gene-9.28-mRNA-1	1	GO:0004252,GO:0006508
maker-tulip_contig_673_pilon_pilon-augustus-gene-0.100-mRNA-1	1	GO:0005215,GO:0016021,GO:0055085,GO:0016021,GO:0055085
augustus_masked-tulip_contig_340_pilon_pilon-processed-gene-0.70-mRNA-1	1	GO:0006508,GO:0016805
maker-tulip_contig_327_pilon_pilon-augustus-gene-7.15-mRNA-1	1
maker-tulip_contig_690_pilon_pilon-augustus-gene-3.57-mRNA-1	1	GO:0005890,GO:0006813,GO:0006814
maker-tulip_contig_331_pilon_pilon-augustus-gene-1.0-mRNA-1	1	GO:0007589,GO:0008613
augustus_masked-tulip_contig_733_pilon_pilon-processed-gene-0.3-mRNA-1	1	GO:0004930,GO:0007186,GO:0016021,GO:0016021,GO:0004983,GO:0007186,GO:0016021
maker-tulip_contig_454_pilon_pilon-augustus-gene-4.2-mRNA-1	1
maker-tulip_contig_218_pilon_pilon-augustus-gene-0.75-mRNA-1	1	GO:0042302
maker-tulip_contig_307_pilon_pilon-augustus-gene-1.91-mRNA-1	1
maker-tulip_contig_881_pilon_pilon-augustus-gene-1.33-mRNA-1	1	GO:0005506,GO:0016705,GO:0020037,GO:0055114,GO:0016705,GO:0055114
augustus_masked-tulip_contig_307_pilon_pilon-processed-gene-1.12-mRNA-1	1
maker-tulip_contig_320_pilon_pilon-augustus-gene-3.33-mRNA-1	1	GO:0004252,GO:0006508
augustus_masked-tulip_contig_407_pilon_pilon-processed-gene-5.14-mRNA-1	1	GO:0006629,GO:0008081
augustus_masked-tulip_contig_159_pilon_pilon-processed-gene-2.34-mRNA-1	1	GO:0052689
augustus_masked-tulip_contig_868_pilon_pilon-processed-gene-0.96-mRNA-1	1	GO:0016021,GO:0022857,GO:0055085
maker-tulip_contig_855_pilon_pilon-augustus-gene-2.15-mRNA-1	1	GO:0005506,GO:0016705,GO:0020037,GO:0055114,GO:0016705,GO:0055114
maker-tulip_contig_662_pilon_pilon-augustus-gene-2.16-mRNA-1	1	GO:0005549
maker-tulip_contig_623_pilon_pilon-augustus-gene-4.40-mRNA-1	1
augustus_masked-tulip_contig_671_pilon_pilon-processed-gene-0.5-mRNA-1	1	GO:0004970,GO:0016020,GO:0005216,GO:0006811,GO:0016020,GO:0038023
maker-tulip_contig_667_pilon_pilon-augustus-gene-0.146-mRNA-1	1
maker-tulip_contig_217_pilon_pilon-augustus-gene-0.18-mRNA-1	1	GO:0016614,GO:0050660,GO:0055114,GO:0016614,GO:0055114
augustus_masked-tulip_contig_479_pilon_pilon-processed-gene-0.61-mRNA-1	1
maker-tulip_contig_194_pilon_pilon-augustus-gene-1.24-mRNA-1	1	GO:0016021
maker-tulip_contig_698_pilon_pilon-augustus-gene-1.26-mRNA-1	1	GO:0005216,GO:0006811,GO:0016020,GO:0055085,GO:0005245,GO:0005891,GO:0070588
maker-tulip_contig_698_pilon_pilon-augustus-gene-1.25-mRNA-1	1
maker-tulip_contig_420_pilon_pilon-augustus-gene-2.71-mRNA-1	1
augustus_masked-tulip_contig_264_pilon_pilon-processed-gene-0.28-mRNA-1	1
maker-tulip_contig_491_pilon_pilon-augustus-gene-0.22-mRNA-1	1	GO:0006974,GO:0008283
maker-tulip_contig_490_pilon_pilon-augustus-gene-2.1-mRNA-1	1	GO:0016614,GO:0050660,GO:0055114,GO:0016614,GO:0055114
augustus_masked-tulip_contig_490_pilon_pilon-processed-gene-2.72-mRNA-1	1	GO:0016614,GO:0050660,GO:0055114,GO:0016614,GO:0055114
augustus_masked-tulip_contig_706_pilon_pilon-processed-gene-0.101-mRNA-1	1	GO:0005515
maker-tulip_contig_807_pilon_pilon-augustus-gene-2.34-mRNA-1	1
maker-tulip_contig_667_pilon_pilon-augustus-gene-0.64-mRNA-1	1	GO:0000256,GO:0004038,GO:0008270,GO:0050897,GO:0016812,GO:0016810,GO:0016787
augustus_masked-tulip_contig_567_pilon_pilon-processed-gene-0.19-mRNA-1	1	GO:0005506,GO:0016705,GO:0020037,GO:0055114
augustus_masked-tulip_contig_270_pilon_pilon-processed-gene-3.216-mRNA-1	1	GO:0004452,GO:0008299,GO:0016787
maker-tulip_contig_767_pilon_pilon-augustus-gene-0.75-mRNA-1	1	GO:0005506,GO:0016705,GO:0020037,GO:0055114
maker-tulip_contig_121_pilon_pilon-augustus-gene-1.18-mRNA-1	1
maker-tulip_contig_3_pilon_pilon-augustus-gene-4.85-mRNA-1	1
maker-tulip_contig_99_pilon_pilon-augustus-gene-0.0-mRNA-1	1
maker-tulip_contig_741_pilon_pilon-augustus-gene-0.25-mRNA-1	1	GO:0005506,GO:0016705,GO:0020037,GO:0055114,GO:0016705,GO:0055114
maker-tulip_contig_241_pilon_pilon-augustus-gene-0.2-mRNA-1	1
maker-tulip_contig_252_pilon_pilon-augustus-gene-0.28-mRNA-1	1
maker-tulip_contig_190_pilon_pilon-augustus-gene-3.2-mRNA-1	1
augustus_masked-tulip_contig_247_pilon_pilon-processed-gene-2.154-mRNA-1	1
augustus_masked-tulip_contig_274_pilon_pilon-processed-gene-0.0-mRNA-1	1	GO:0016020
augustus_masked-tulip_contig_37_pilon_pilon-processed-gene-3.5-mRNA-1	1	GO:0003676,GO:0008270
augustus_masked-tulip_contig_663_pilon_pilon-processed-gene-0.0-mRNA-1	1
augustus_masked-tulip_contig_702_pilon_pilon-processed-gene-0.25-mRNA-1	1	GO:0004970,GO:0016020
maker-tulip_contig_33_pilon_pilon-augustus-gene-1.48-mRNA-1	1
maker-tulip_contig_674_pilon_pilon-augustus-gene-7.36-mRNA-1	1	GO:0008270,GO:0016491,GO:0055114,GO:0055114,GO:0016491
augustus_masked-tulip_contig_138_pilon_pilon-processed-gene-0.8-mRNA-1	1
maker-tulip_contig_126_pilon_pilon-augustus-gene-0.6-mRNA-1	1
maker-tulip_contig_482_pilon_pilon-augustus-gene-0.1-mRNA-1	1	GO:0004930,GO:0007186,GO:0016021,GO:0016021
maker-tulip_contig_516_pilon_pilon-augustus-gene-3.5-mRNA-1	1
maker-tulip_contig_69_pilon_pilon-augustus-gene-2.30-mRNA-1	1	GO:0004553,GO:0005975,GO:0008061,GO:0005975
maker-tulip_contig_69_pilon_pilon-augustus-gene-2.27-mRNA-1	1	GO:0005975,GO:0008061
maker-tulip_contig_69_pilon_pilon-augustus-gene-2.26-mRNA-1	1	GO:0004553,GO:0005975,GO:0008061,GO:0006030,GO:0008061,GO:0005975,GO:0005576,GO:0006030,GO:0008061
maker-tulip_contig_247_pilon_pilon-augustus-gene-2.69-mRNA-1	1
maker-tulip_contig_66_pilon_pilon-augustus-gene-2.2-mRNA-1	1	GO:0016021,GO:0022857,GO:0055085
maker-tulip_contig_81_pilon_pilon-augustus-gene-1.8-mRNA-1	1
maker-tulip_contig_145_pilon_pilon-augustus-gene-6.27-mRNA-1	1	GO:0004672,GO:0005524,GO:0006468,GO:0005267,GO:0016020,GO:0071805,GO:0004674,GO:0005524,GO:0006468
augustus_masked-tulip_contig_669_pilon_pilon-processed-gene-0.18-mRNA-1	1
maker-tulip_contig_702_pilon_pilon-augustus-gene-0.52-mRNA-1	1	GO:0004970,GO:0016020,GO:0005216,GO:0006811,GO:0016020,GO:0038023
maker-tulip_contig_468_pilon_pilon-augustus-gene-3.16-mRNA-1	1	GO:0005509,GO:0005576,GO:0030414
augustus_masked-tulip_contig_72_pilon_pilon-processed-gene-0.10-mRNA-1	1	GO:0016491
maker-tulip_contig_33_pilon_pilon-augustus-gene-2.4-mRNA-1	1
maker-tulip_contig_81_pilon_pilon-augustus-gene-0.72-mRNA-1	1	GO:0016614,GO:0050660,GO:0055114,GO:0016614,GO:0055114
augustus_masked-tulip_contig_156_pilon_pilon-processed-gene-0.1-mRNA-1	1	GO:0004601,GO:0006979,GO:0020037,GO:0055114
maker-tulip_contig_205_pilon_pilon-augustus-gene-0.72-mRNA-1	1	GO:0016021
maker-tulip_contig_209_pilon_pilon-augustus-gene-1.59-mRNA-1	1	GO:0008146
maker-tulip_contig_697_pilon_pilon-augustus-gene-0.17-mRNA-1	1
augustus_masked-tulip_contig_191_pilon_pilon-processed-gene-0.14-mRNA-1	1	GO:0042302
augustus_masked-tulip_contig_148_pilon_pilon-processed-gene-0.66-mRNA-1	1	GO:0004497,GO:0005506,GO:0020037,GO:0055114,GO:0005506,GO:0016705,GO:0020037,GO:0055114
maker-tulip_contig_375_pilon_pilon-augustus-gene-1.24-mRNA-1	1	GO:0016614,GO:0050660,GO:0055114,GO:0016614,GO:0055114
maker-tulip_contig_441_pilon_pilon-augustus-gene-9.23-mRNA-1	1	GO:0005215
maker-tulip_contig_604_pilon_pilon-augustus-gene-2.8-mRNA-1	1
augustus_masked-tulip_contig_216_pilon_pilon-processed-gene-0.98-mRNA-1	1	GO:0005201,GO:0005581
maker-tulip_contig_132_pilon_pilon-augustus-gene-1.31-mRNA-1	1	GO:0005515
maker-tulip_contig_605_pilon_pilon-augustus-gene-0.68-mRNA-1	1
maker-tulip_contig_216_pilon_pilon-augustus-gene-0.56-mRNA-1	1	GO:0005201,GO:0005581
augustus_masked-tulip_contig_216_pilon_pilon-processed-gene-0.97-mRNA-1	1	GO:0005201,GO:0005581
augustus_masked-tulip_contig_322_pilon_pilon-processed-gene-0.42-mRNA-1	1	GO:0052689
augustus_masked-tulip_contig_881_pilon_pilon-processed-gene-1.63-mRNA-1	1
maker-tulip_contig_597_pilon_pilon-augustus-gene-4.36-mRNA-1	1
maker-tulip_contig_707_pilon_pilon-augustus-gene-0.67-mRNA-1	1
maker-tulip_contig_31_pilon_pilon-augustus-gene-1.60-mRNA-1	1
maker-tulip_contig_917_pilon_pilon-augustus-gene-0.1-mRNA-1	1
maker-tulip_contig_854_pilon_pilon-augustus-gene-2.28-mRNA-1	1	GO:0005509,GO:0007156,GO:0016020,GO:0005886,GO:0007155,GO:0005509,GO:0016020
maker-tulip_contig_931_pilon_pilon-augustus-gene-1.45-mRNA-1	1	GO:0046983
maker-tulip_contig_525_pilon_pilon-augustus-gene-2.34-mRNA-1	1	GO:0016021,GO:0022857,GO:0055085
maker-tulip_contig_538_pilon_pilon-augustus-gene-0.52-mRNA-1	1	GO:0003924,GO:0005874,GO:0007017,GO:0005200,GO:0005525,GO:0005874,GO:0007017
maker-tulip_contig_468_pilon_pilon-augustus-gene-3.77-mRNA-1	1	GO:0005515
maker-tulip_contig_525_pilon_pilon-augustus-gene-2.35-mRNA-1	1	GO:0016021,GO:0022857,GO:0055085
maker-tulip_contig_839_pilon_pilon-augustus-gene-1.27-mRNA-1	1
augustus_masked-tulip_contig_515_pilon_pilon-processed-gene-2.45-mRNA-1	1	GO:0003884,GO:0046416,GO:0071949,GO:0016491,GO:0055114
augustus_masked-tulip_contig_351_pilon_pilon-processed-gene-1.118-mRNA-1	1
maker-tulip_contig_112_pilon_pilon-augustus-gene-0.4-mRNA-1	1	GO:0006811,GO:0016021
augustus_masked-tulip_contig_4_pilon_pilon-processed-gene-1.49-mRNA-1	1
maker-tulip_contig_697_pilon_pilon-augustus-gene-2.10-mRNA-1	1
maker-tulip_contig_474_pilon_pilon-augustus-gene-4.68-mRNA-1	1
augustus_masked-tulip_contig_715_pilon_pilon-processed-gene-1.14-mRNA-1	1	GO:0005515
maker-tulip_contig_39_pilon_pilon-augustus-gene-0.24-mRNA-1	1	GO:0004930,GO:0007186,GO:0016021,GO:0016021,GO:0008528
augustus_masked-tulip_contig_636_pilon_pilon-processed-gene-0.15-mRNA-1	1
maker-tulip_contig_248_pilon_pilon-augustus-gene-0.32-mRNA-1	1
maker-tulip_contig_293_pilon_pilon-augustus-gene-0.0-mRNA-1	1
maker-tulip_contig_812_pilon_pilon-augustus-gene-2.44-mRNA-1	1	GO:0016021
maker-tulip_contig_284_pilon_pilon-augustus-gene-0.0-mRNA-1	1
maker-tulip_contig_72_pilon_pilon-augustus-gene-1.0-mRNA-1	1	GO:0004930,GO:0007186,GO:0016021,GO:0004965,GO:0007186,GO:0016021
maker-tulip_contig_555_pilon_pilon-augustus-gene-2.53-mRNA-1	1
maker-tulip_contig_110_pilon_pilon-augustus-gene-2.66-mRNA-1	1
augustus_masked-tulip_contig_482_pilon_pilon-processed-gene-2.33-mRNA-1	1	GO:0003676,GO:0005515
maker-tulip_contig_89_pilon_pilon-augustus-gene-0.30-mRNA-1	1	GO:0003676,GO:0008270
maker-tulip_contig_515_pilon_pilon-augustus-gene-1.34-mRNA-1	1	GO:0001518,GO:0005248,GO:0006814,GO:0005515,GO:0005216,GO:0006811,GO:0016020,GO:0055085
maker-tulip_contig_104_pilon_pilon-augustus-gene-0.29-mRNA-1	1
maker-tulip_contig_479_pilon_pilon-augustus-gene-4.20-mRNA-1	1
maker-tulip_contig_704_pilon_pilon-augustus-gene-2.46-mRNA-1	1
maker-tulip_contig_209_pilon_pilon-augustus-gene-2.31-mRNA-1	1	GO:0005328,GO:0005328,GO:0006836,GO:0016021
augustus_masked-tulip_contig_867_pilon_pilon-processed-gene-0.35-mRNA-1	1
augustus_masked-tulip_contig_55_pilon_pilon-processed-gene-0.5-mRNA-1	1	GO:0005086,GO:0032012
augustus_masked-tulip_contig_860_pilon_pilon-processed-gene-6.30-mRNA-1	1
maker-tulip_contig_506_pilon_pilon-augustus-gene-1.165-mRNA-1	1	GO:0005515,GO:0007605,GO:0050953
augustus_masked-tulip_contig_711_pilon_pilon-processed-gene-2.10-mRNA-1	1	GO:0005515
maker-tulip_contig_234_pilon_pilon-augustus-gene-5.46-mRNA-1	1
maker-tulip_contig_493_pilon_pilon-augustus-gene-0.6-mRNA-1	1
augustus_masked-tulip_contig_326_pilon_pilon-processed-gene-2.32-mRNA-1	1
augustus_masked-tulip_contig_854_pilon_pilon-processed-gene-2.7-mRNA-1	1	GO:0005509,GO:0007156,GO:0016020,GO:0005509,GO:0016020
augustus_masked-tulip_contig_441_pilon_pilon-processed-gene-7.2-mRNA-1	1
augustus_masked-tulip_contig_362_pilon_pilon-processed-gene-2.4-mRNA-1	1	GO:0005509,GO:0005515
maker-tulip_contig_362_pilon_pilon-augustus-gene-2.7-mRNA-1	1	GO:0005515
maker-tulip_contig_611_pilon_pilon-augustus-gene-1.12-mRNA-1	1	GO:0005515
augustus_masked-tulip_contig_474_pilon_pilon-processed-gene-3.10-mRNA-1	1
maker-tulip_contig_281_pilon_pilon-augustus-gene-5.37-mRNA-1	1
maker-tulip_contig_441_pilon_pilon-augustus-gene-7.12-mRNA-1	1	GO:0004672,GO:0005524,GO:0006468,GO:0004672,GO:0006468
maker-tulip_contig_482_pilon_pilon-augustus-gene-1.38-mRNA-1	1	GO:0005042,GO:0016021,GO:0038007,GO:0005515,GO:0007165
maker-tulip_contig_515_pilon_pilon-augustus-gene-5.11-mRNA-1	1
maker-tulip_contig_226_pilon_pilon-augustus-gene-0.1-mRNA-1	1	GO:0005506,GO:0016705,GO:0020037,GO:0055114
maker-tulip_contig_34_pilon_pilon-augustus-gene-0.102-mRNA-1	1	GO:0004252,GO:0006508
augustus_masked-tulip_contig_773_pilon_pilon-processed-gene-2.14-mRNA-1	1	GO:0005515
maker-tulip_contig_357_pilon_pilon-augustus-gene-1.39-mRNA-1	1	GO:0004930,GO:0007186,GO:0016021,GO:0016021,GO:0007186,GO:0016021
maker-tulip_contig_218_pilon_pilon-augustus-gene-2.30-mRNA-1	1
maker-tulip_contig_236_pilon_pilon-augustus-gene-4.41-mRNA-1	1
maker-tulip_contig_236_pilon_pilon-augustus-gene-4.95-mRNA-1	1
maker-tulip_contig_436_pilon_pilon-augustus-gene-0.8-mRNA-1	1
augustus_masked-tulip_contig_907_pilon_pilon-processed-gene-2.57-mRNA-1	1
maker-tulip_contig_664_pilon_pilon-augustus-gene-0.6-mRNA-1	1
maker-tulip_contig_362_pilon_pilon-augustus-gene-6.16-mRNA-1	1	GO:0005737,GO:0120009,GO:0120013
maker-tulip_contig_95_pilon_pilon-augustus-gene-0.56-mRNA-1	1
maker-tulip_contig_132_pilon_pilon-augustus-gene-0.7-mRNA-1	1	GO:0016021
augustus_masked-tulip_contig_334_pilon_pilon-processed-gene-1.7-mRNA-1	1	GO:0005432,GO:0006816,GO:0016020,GO:0016021,GO:0055085,GO:0007154,GO:0016021
maker-tulip_contig_474_pilon_pilon-augustus-gene-5.47-mRNA-1	1	GO:0048786
maker-tulip_contig_547_pilon_pilon-augustus-gene-4.0-mRNA-1	1	GO:0009190,GO:0016849,GO:0035556
maker-tulip_contig_603_pilon_pilon-augustus-gene-3.78-mRNA-1	1
maker-tulip_contig_43_pilon_pilon-augustus-gene-3.7-mRNA-1	1	GO:0004252,GO:0006508
maker-tulip_contig_58_pilon_pilon-augustus-gene-0.49-mRNA-1	1
maker-tulip_contig_632_pilon_pilon-augustus-gene-3.27-mRNA-1	1	GO:0004888,GO:0005216,GO:0016021,GO:0034220,GO:0005230,GO:0006811,GO:0016021
maker-tulip_contig_547_pilon_pilon-augustus-gene-0.17-mRNA-1	1	GO:0001558,GO:0005520,GO:0005576
maker-tulip_contig_837_pilon_pilon-augustus-gene-8.59-mRNA-1	1	GO:0005515
maker-tulip_contig_843_pilon_pilon-augustus-gene-9.66-mRNA-1	1
maker-tulip_contig_690_pilon_pilon-augustus-gene-1.65-mRNA-1	1	GO:0004672,GO:0005524,GO:0006468,GO:0005524,GO:0004672,GO:0006468
maker-tulip_contig_247_pilon_pilon-augustus-gene-1.47-mRNA-1	1
augustus_masked-tulip_contig_483_pilon_pilon-processed-gene-0.17-mRNA-1	1
maker-tulip_contig_65_pilon_pilon-augustus-gene-0.10-mRNA-1	1
maker-tulip_contig_597_pilon_pilon-augustus-gene-3.27-mRNA-1	1
maker-tulip_contig_831_pilon_pilon-augustus-gene-4.57-mRNA-1	1	GO:0008146,GO:0016021,GO:0008146,GO:0016021,GO:0016051
maker-tulip_contig_547_pilon_pilon-augustus-gene-6.39-mRNA-1	1
augustus_masked-tulip_contig_547_pilon_pilon-processed-gene-6.6-mRNA-1	1
maker-tulip_contig_192_pilon_pilon-augustus-gene-1.50-mRNA-1	1	GO:0005272,GO:0006814,GO:0016020
maker-tulip_contig_762_pilon_pilon-augustus-gene-0.21-mRNA-1	1
maker-tulip_contig_560_pilon_pilon-augustus-gene-3.18-mRNA-1	1	GO:0005515
augustus_masked-tulip_contig_187_pilon_pilon-processed-gene-0.11-mRNA-1	1
maker-tulip_contig_416_pilon_pilon-augustus-gene-0.15-mRNA-1	1	GO:0006508,GO:0006508,GO:0008236
maker-tulip_contig_408_pilon_pilon-augustus-gene-0.30-mRNA-1	1	GO:0005216,GO:0006811,GO:0016020,GO:0055085,GO:0005249,GO:0006813,GO:0016020
maker-tulip_contig_916_pilon_pilon-augustus-gene-0.21-mRNA-1	1
maker-tulip_contig_175_pilon_pilon-augustus-gene-1.2-mRNA-1	1
augustus_masked-tulip_contig_705_pilon_pilon-processed-gene-0.23-mRNA-1	1	GO:0016020
augustus_masked-tulip_contig_586_pilon_pilon-processed-gene-0.87-mRNA-1	1	GO:0005779,GO:0016559
maker-tulip_contig_483_pilon_pilon-augustus-gene-0.1-mRNA-1	1
maker-tulip_contig_860_pilon_pilon-augustus-gene-0.18-mRNA-1	1	GO:0003714,GO:0006351
augustus_masked-tulip_contig_175_pilon_pilon-processed-gene-0.6-mRNA-1	1
maker-tulip_contig_333_pilon_pilon-augustus-gene-3.69-mRNA-1	1
maker-tulip_contig_226_pilon_pilon-augustus-gene-0.2-mRNA-1	1	GO:0005506,GO:0016705,GO:0020037,GO:0055114
augustus_masked-tulip_contig_228_pilon_pilon-processed-gene-1.1-mRNA-1	1
maker-tulip_contig_441_pilon_pilon-augustus-gene-3.10-mRNA-1	1
maker-tulip_contig_215_pilon_pilon-augustus-gene-0.5-mRNA-1	1
maker-tulip_contig_159_pilon_pilon-augustus-gene-2.31-mRNA-1	1
maker-tulip_contig_759_pilon_pilon-augustus-gene-1.61-mRNA-1	1	GO:0005515
maker-tulip_contig_268_pilon_pilon-augustus-gene-0.12-mRNA-1	1	GO:0004930,GO:0007186,GO:0004930,GO:0007186,GO:0016021
maker-tulip_contig_271_pilon_pilon-augustus-gene-2.53-mRNA-1	1	GO:0005509,GO:0016021,GO:0016079
augustus_masked-tulip_contig_271_pilon_pilon-processed-gene-0.18-mRNA-1	1
maker-tulip_contig_244_pilon_pilon-augustus-gene-0.42-mRNA-1	1	GO:0005515
augustus_masked-tulip_contig_651_pilon_pilon-processed-gene-0.0-mRNA-1	1
maker-tulip_contig_847_pilon_pilon-augustus-gene-0.9-mRNA-1	1	GO:0016020
augustus_masked-tulip_contig_812_pilon_pilon-processed-gene-1.7-mRNA-1	1	GO:0004252,GO:0006508,GO:0016021,GO:0004252,GO:0016021
augustus_masked-tulip_contig_61_pilon_pilon-processed-gene-0.74-mRNA-1	1
maker-tulip_contig_547_pilon_pilon-augustus-gene-0.19-mRNA-1	1
maker-tulip_contig_247_pilon_pilon-augustus-gene-2.118-mRNA-1	1
maker-tulip_contig_550_pilon_pilon-augustus-gene-0.17-mRNA-1	1	GO:0006508,GO:0006508,GO:0008236
maker-tulip_contig_759_pilon_pilon-augustus-gene-1.138-mRNA-1	1
maker-tulip_contig_3_pilon_pilon-augustus-gene-2.19-mRNA-1	1	GO:0006813,GO:0016020
augustus_masked-tulip_contig_907_pilon_pilon-processed-gene-3.10-mRNA-1	1	GO:0016533,GO:0016534
maker-tulip_contig_837_pilon_pilon-augustus-gene-5.4-mRNA-1	1
maker-tulip_contig_527_pilon_pilon-augustus-gene-0.40-mRNA-1	1	GO:0080019
maker-tulip_contig_424_pilon_pilon-augustus-gene-0.79-mRNA-1	1	GO:0016021
maker-tulip_contig_873_pilon_pilon-augustus-gene-0.0-mRNA-1	1
augustus_masked-tulip_contig_669_pilon_pilon-processed-gene-2.25-mRNA-1	1	GO:0016746
maker-tulip_contig_86_pilon_pilon-augustus-gene-0.42-mRNA-1	1
maker-tulip_contig_640_pilon_pilon-augustus-gene-0.3-mRNA-1	1	GO:0005216,GO:0006811,GO:0016020,GO:0055085
maker-tulip_contig_560_pilon_pilon-augustus-gene-3.19-mRNA-1	1
maker-tulip_contig_907_pilon_pilon-augustus-gene-4.11-mRNA-1	1	GO:0005515
maker-tulip_contig_351_pilon_pilon-augustus-gene-1.78-mRNA-1	1
maker-tulip_contig_212_pilon_pilon-augustus-gene-1.88-mRNA-1	1	GO:0004930,GO:0007186,GO:0004930,GO:0007186,GO:0016021
maker-tulip_contig_244_pilon_pilon-augustus-gene-0.43-mRNA-1	1
maker-tulip_contig_429_pilon_pilon-augustus-gene-3.52-mRNA-1	1	GO:0005515
maker-tulip_contig_135_pilon_pilon-augustus-gene-0.0-mRNA-1	1
maker-tulip_contig_247_pilon_pilon-augustus-gene-1.48-mRNA-1	1	GO:0005515,GO:0006887,GO:0016020,GO:0017137,GO:0048786
maker-tulip_contig_287_pilon_pilon-augustus-gene-0.12-mRNA-1	1	GO:0005515
maker-tulip_contig_104_pilon_pilon-augustus-gene-0.27-mRNA-1	1	GO:0005515
augustus_masked-tulip_contig_698_pilon_pilon-processed-gene-0.2-mRNA-1	1	GO:0003677
maker-tulip_contig_603_pilon_pilon-augustus-gene-2.9-mRNA-1	1	GO:0006368,GO:0008023
maker-tulip_contig_404_pilon_pilon-augustus-gene-0.0-mRNA-1	1	GO:0005515
maker-tulip_contig_133_pilon_pilon-augustus-gene-1.34-mRNA-1	1	GO:0016787
maker-tulip_contig_762_pilon_pilon-augustus-gene-0.22-mRNA-1	1
maker-tulip_contig_907_pilon_pilon-augustus-gene-0.27-mRNA-1	1	GO:0003676
augustus_masked-tulip_contig_704_pilon_pilon-processed-gene-2.110-mRNA-1	1
maker-tulip_contig_67_pilon_pilon-augustus-gene-0.0-mRNA-1	1
maker-tulip_contig_3_pilon_pilon-augustus-gene-4.87-mRNA-1	1	GO:0005515
maker-tulip_contig_581_pilon_pilon-augustus-gene-0.6-mRNA-1	1	GO:0005515
augustus_masked-tulip_contig_632_pilon_pilon-processed-gene-3.18-mRNA-1	1	GO:0004888,GO:0005216,GO:0016021,GO:0034220,GO:0006811,GO:0016021,GO:0005230,GO:0006811,GO:0016021,GO:0004890,GO:0005216,GO:0006811,GO:0016020
maker-tulip_contig_185_pilon_pilon-augustus-gene-0.20-mRNA-1	1	GO:0005515
maker-tulip_contig_323_pilon_pilon-augustus-gene-4.23-mRNA-1	1
augustus_masked-tulip_contig_677_pilon_pilon-processed-gene-0.26-mRNA-1	1	GO:0008146
maker-tulip_contig_640_pilon_pilon-augustus-gene-0.6-mRNA-1	1
maker-tulip_contig_102_pilon_pilon-augustus-gene-0.46-mRNA-1	1
augustus_masked-tulip_contig_616_pilon_pilon-processed-gene-2.4-mRNA-1	1	GO:0004930,GO:0007186,GO:0016021,GO:0016021
augustus_masked-tulip_contig_633_pilon_pilon-processed-gene-0.21-mRNA-1	1	GO:0005515
maker-tulip_contig_345_pilon_pilon-augustus-gene-1.64-mRNA-1	1
maker-tulip_contig_784_pilon_pilon-augustus-gene-0.22-mRNA-1	1	GO:0038023
maker-tulip_contig_209_pilon_pilon-augustus-gene-3.41-mRNA-1	1
maker-tulip_contig_721_pilon_pilon-augustus-gene-1.0-mRNA-1	1	GO:0005198,GO:0005604,GO:0007155
augustus_masked-tulip_contig_661_pilon_pilon-processed-gene-1.66-mRNA-1	1	GO:0005856
maker-tulip_contig_784_pilon_pilon-augustus-gene-0.23-mRNA-1	1	GO:0038023
augustus_masked-tulip_contig_58_pilon_pilon-processed-gene-0.13-mRNA-1	1
maker-tulip_contig_3_pilon_pilon-augustus-gene-6.31-mRNA-1	1
augustus_masked-tulip_contig_52_pilon_pilon-processed-gene-2.14-mRNA-1	1	GO:0003676,GO:0008270
maker-tulip_contig_479_pilon_pilon-augustus-gene-0.45-mRNA-1	1	GO:0006811,GO:0008273,GO:0016021,GO:0016021,GO:0055085
maker-tulip_contig_283_pilon_pilon-augustus-gene-1.6-mRNA-1	1
augustus_masked-tulip_contig_800_pilon_pilon-processed-gene-0.14-mRNA-1	1	GO:0005515
maker-tulip_contig_280_pilon_pilon-augustus-gene-1.49-mRNA-1	1	GO:0016012,GO:0016021
maker-tulip_contig_175_pilon_pilon-augustus-gene-1.0-mRNA-1	1	GO:0005515
augustus_masked-tulip_contig_546_pilon_pilon-processed-gene-0.69-mRNA-1	1
augustus_masked-tulip_contig_479_pilon_pilon-processed-gene-0.63-mRNA-1	1	GO:0016021,GO:0055085
augustus_masked-tulip_contig_61_pilon_pilon-processed-gene-0.70-mRNA-1	1
maker-tulip_contig_167_pilon_pilon-augustus-gene-0.47-mRNA-1	1	GO:0004252,GO:0006508
maker-tulip_contig_121_pilon_pilon-augustus-gene-0.32-mRNA-1	1	GO:0004888,GO:0005216,GO:0016021,GO:0034220,GO:0006811,GO:0016021,GO:0005230,GO:0006811,GO:0016021
maker-tulip_contig_279_pilon_pilon-augustus-gene-2.5-mRNA-1	1	GO:0016787
maker-tulip_contig_61_pilon_pilon-augustus-gene-0.10-mRNA-1	1	GO:0005328,GO:0005328,GO:0006836,GO:0016021
maker-tulip_contig_175_pilon_pilon-augustus-gene-1.1-mRNA-1	1	GO:0005515
augustus_masked-tulip_contig_362_pilon_pilon-processed-gene-6.25-mRNA-1	1
augustus_masked-tulip_contig_559_pilon_pilon-processed-gene-1.3-mRNA-1	1
maker-tulip_contig_455_pilon_pilon-augustus-gene-1.28-mRNA-1	1
augustus_masked-tulip_contig_722_pilon_pilon-processed-gene-0.17-mRNA-1	1	GO:0005515
maker-tulip_contig_407_pilon_pilon-augustus-gene-2.30-mRNA-1	1	GO:0005216,GO:0006811,GO:0016020,GO:0055085
augustus_masked-tulip_contig_244_pilon_pilon-processed-gene-0.25-mRNA-1	1	GO:0005515
maker-tulip_contig_323_pilon_pilon-augustus-gene-3.22-mRNA-1	1	GO:0004672,GO:0005524,GO:0006468,GO:0004672,GO:0006468
maker-tulip_contig_244_pilon_pilon-augustus-gene-0.32-mRNA-1	1	GO:0005044,GO:0016020,GO:0005515
augustus_masked-tulip_contig_56_pilon_pilon-processed-gene-0.89-mRNA-1	1	GO:0004930,GO:0007186,GO:0016021,GO:0016021
maker-tulip_contig_168_pilon_pilon-augustus-gene-1.12-mRNA-1	1
maker-tulip_contig_894_pilon_pilon-augustus-gene-0.3-mRNA-1	1	GO:0005515
maker-tulip_contig_271_pilon_pilon-augustus-gene-1.63-mRNA-1	1	GO:0005085,GO:0007264
maker-tulip_contig_519_pilon_pilon-augustus-gene-0.12-mRNA-1	1	GO:0019901,GO:0061098
maker-tulip_contig_674_pilon_pilon-augustus-gene-2.17-mRNA-1	1
maker-tulip_contig_412_pilon_pilon-augustus-gene-0.2-mRNA-1	1
maker-tulip_contig_3_pilon_pilon-augustus-gene-1.17-mRNA-1	1	GO:0005515
maker-tulip_contig_687_pilon_pilon-augustus-gene-2.1-mRNA-1	1
maker-tulip_contig_2_pilon_pilon-augustus-gene-6.19-mRNA-1	1	GO:0004930,GO:0007186,GO:0016021,GO:0016021
augustus_masked-tulip_contig_247_pilon_pilon-processed-gene-2.156-mRNA-1	1
augustus_masked-tulip_contig_425_pilon_pilon-processed-gene-0.11-mRNA-1	1
augustus_masked-tulip_contig_687_pilon_pilon-processed-gene-2.17-mRNA-1	1
augustus_masked-tulip_contig_199_pilon_pilon-processed-gene-6.4-mRNA-1	1	GO:0003676
maker-tulip_contig_687_pilon_pilon-augustus-gene-2.2-mRNA-1	1
augustus_masked-tulip_contig_827_pilon_pilon-processed-gene-0.1-mRNA-1	1
maker-tulip_contig_461_pilon_pilon-augustus-gene-0.2-mRNA-1	1	GO:0004930,GO:0007186,GO:0016021,GO:0016021
maker-tulip_contig_121_pilon_pilon-augustus-gene-2.7-mRNA-1	1
augustus_masked-tulip_contig_61_pilon_pilon-processed-gene-0.63-mRNA-1	1	GO:0005328,GO:0005328,GO:0006836,GO:0016021
augustus_masked-tulip_contig_514_pilon_pilon-processed-gene-1.46-mRNA-1	1	GO:0004672,GO:0005524,GO:0006468,GO:0005524,GO:0004672,GO:0006468
maker-tulip_contig_559_pilon_pilon-augustus-gene-1.9-mRNA-1	1	GO:0005515
maker-tulip_contig_845_pilon_pilon-augustus-gene-0.59-mRNA-1	1	GO:0004252,GO:0006508
maker-tulip_contig_199_pilon_pilon-augustus-gene-5.23-mRNA-1	1	GO:0003677
maker-tulip_contig_21_pilon_pilon-augustus-gene-0.2-mRNA-1	1
maker-tulip_contig_916_pilon_pilon-augustus-gene-1.36-mRNA-1	1	GO:0004930,GO:0007186,GO:0016021,GO:0016021
augustus_masked-tulip_contig_196_pilon_pilon-processed-gene-4.10-mRNA-1	1
augustus_masked-tulip_contig_37_pilon_pilon-processed-gene-0.7-mRNA-1	1	GO:0004930,GO:0007186,GO:0016021,GO:0016021
maker-tulip_contig_33_pilon_pilon-augustus-gene-4.18-mRNA-1	1	GO:0004888,GO:0005216,GO:0016021,GO:0034220,GO:0005230,GO:0006811,GO:0016021
maker-tulip_contig_584_pilon_pilon-augustus-gene-3.27-mRNA-1	1	GO:0005179,GO:0005179,GO:0005576
augustus_masked-tulip_contig_495_pilon_pilon-processed-gene-0.14-mRNA-1	1
augustus_masked-tulip_contig_506_pilon_pilon-processed-gene-1.22-mRNA-1	1
maker-tulip_contig_234_pilon_pilon-augustus-gene-1.3-mRNA-1	1
augustus_masked-tulip_contig_702_pilon_pilon-processed-gene-0.22-mRNA-1	1
maker-tulip_contig_316_pilon_pilon-augustus-gene-3.71-mRNA-1	1	GO:0005515
maker-tulip_contig_783_pilon_pilon-augustus-gene-0.48-mRNA-1	1	GO:0005515
augustus_masked-tulip_contig_690_pilon_pilon-processed-gene-5.18-mRNA-1	1
maker-tulip_contig_44_pilon_pilon-augustus-gene-2.26-mRNA-1	1
maker-tulip_contig_407_pilon_pilon-augustus-gene-1.54-mRNA-1	1
maker-tulip_contig_424_pilon_pilon-augustus-gene-2.32-mRNA-1	1	GO:0003676,GO:0005634,GO:0008270
maker-tulip_contig_339_pilon_pilon-augustus-gene-1.14-mRNA-1	1	GO:0004930,GO:0007186,GO:0016021,GO:0016021
augustus_masked-tulip_contig_733_pilon_pilon-processed-gene-0.11-mRNA-1	1	GO:0004930,GO:0007186,GO:0016021,GO:0016021,GO:0004983,GO:0007186,GO:0016021
maker-tulip_contig_519_pilon_pilon-augustus-gene-0.28-mRNA-1	1	GO:0019901,GO:0061098
augustus_masked-tulip_contig_316_pilon_pilon-processed-gene-0.2-mRNA-1	1	GO:0005515
maker-tulip_contig_281_pilon_pilon-augustus-gene-2.25-mRNA-1	1	GO:0003677,GO:0003700,GO:0005634,GO:0006355,GO:0003700,GO:0006355,GO:0003677,GO:0005524,GO:0005634,GO:0006355,GO:0003677,GO:0003700,GO:0006355
maker-tulip_contig_228_pilon_pilon-augustus-gene-1.31-mRNA-1	1	GO:0005515
maker-tulip_contig_362_pilon_pilon-augustus-gene-6.3-mRNA-1	1
maker-tulip_contig_44_pilon_pilon-augustus-gene-6.38-mRNA-1	1
maker-tulip_contig_506_pilon_pilon-augustus-gene-0.17-mRNA-1	1	GO:0046983
maker-tulip_contig_555_pilon_pilon-augustus-gene-2.70-mRNA-1	1	GO:0003676
maker-tulip_contig_860_pilon_pilon-augustus-gene-3.0-mRNA-1	1	GO:0003677,GO:0006355,GO:0043565
maker-tulip_contig_281_pilon_pilon-augustus-gene-2.0-mRNA-1	1
maker-tulip_contig_623_pilon_pilon-augustus-gene-2.5-mRNA-1	1	GO:0005509
maker-tulip_contig_584_pilon_pilon-augustus-gene-1.12-mRNA-1	1
augustus_masked-tulip_contig_715_pilon_pilon-processed-gene-1.13-mRNA-1	1	GO:0005515
augustus_masked-tulip_contig_339_pilon_pilon-processed-gene-3.0-mRNA-1	1	GO:0004930,GO:0007186,GO:0016021,GO:0016021
maker-tulip_contig_662_pilon_pilon-augustus-gene-2.38-mRNA-1	1	GO:0005549
maker-tulip_contig_236_pilon_pilon-augustus-gene-8.43-mRNA-1	1
augustus_masked-tulip_contig_870_pilon_pilon-processed-gene-3.9-mRNA-1	1
maker-tulip_contig_37_pilon_pilon-augustus-gene-3.27-mRNA-1	1
maker-tulip_contig_559_pilon_pilon-augustus-gene-3.13-mRNA-1	1
maker-tulip_contig_506_pilon_pilon-augustus-gene-1.95-mRNA-1	1	GO:0003676
maker-tulip_contig_587_pilon_pilon-augustus-gene-0.1-mRNA-1	1
maker-tulip_contig_515_pilon_pilon-augustus-gene-1.33-mRNA-1	1	GO:0005216,GO:0006811,GO:0016020,GO:0055085
augustus_masked-tulip_contig_245_pilon_pilon-processed-gene-0.2-mRNA-1	1
augustus_masked-tulip_contig_3_pilon_pilon-processed-gene-4.24-mRNA-1	1	GO:0005249,GO:0005737,GO:0006813
maker-tulip_contig_313_pilon_pilon-augustus-gene-0.14-mRNA-1	1
maker-tulip_contig_388_pilon_pilon-augustus-gene-0.50-mRNA-1	1
augustus_masked-tulip_contig_718_pilon_pilon-processed-gene-1.0-mRNA-1	1	GO:0004930,GO:0007186,GO:0016021,GO:0016021
maker-tulip_contig_654_pilon_pilon-augustus-gene-1.69-mRNA-1	1	GO:0005515
augustus_masked-tulip_contig_446_pilon_pilon-processed-gene-1.47-mRNA-1	1	GO:0002098,GO:0016300
maker-tulip_contig_645_pilon_pilon-augustus-gene-2.9-mRNA-1	1	GO:0004930,GO:0007186,GO:0016021,GO:0016021
augustus_masked-tulip_contig_604_pilon_pilon-processed-gene-1.1-mRNA-1	1	GO:0004435,GO:0006629,GO:0007165,GO:0035556,GO:0035556,GO:0006629,GO:0008081
maker-tulip_contig_327_pilon_pilon-augustus-gene-7.44-mRNA-1	1	GO:0005515
maker-tulip_contig_33_pilon_pilon-augustus-gene-4.19-mRNA-1	1	GO:0004888,GO:0005216,GO:0016021,GO:0034220,GO:0006811,GO:0016021,GO:0005230,GO:0006811,GO:0016021,GO:0004890,GO:0005216,GO:0006811,GO:0016020
maker-tulip_contig_85_pilon_pilon-augustus-gene-2.6-mRNA-1	1
maker-tulip_contig_733_pilon_pilon-augustus-gene-0.22-mRNA-1	1
maker-tulip_contig_838_pilon_pilon-augustus-gene-0.1-mRNA-1	1	GO:0016021,GO:0022857,GO:0055085
maker-tulip_contig_673_pilon_pilon-augustus-gene-2.5-mRNA-1	1
augustus_masked-tulip_contig_407_pilon_pilon-processed-gene-8.18-mRNA-1	1	GO:0003676
maker-tulip_contig_476_pilon_pilon-augustus-gene-0.27-mRNA-1	1	GO:0005267,GO:0016020,GO:0071805
augustus_masked-tulip_contig_313_pilon_pilon-processed-gene-0.5-mRNA-1	1
maker-tulip_contig_515_pilon_pilon-augustus-gene-7.27-mRNA-1	1	GO:0016021,GO:0055085
augustus_masked-tulip_contig_584_pilon_pilon-processed-gene-0.15-mRNA-1	1
maker-tulip_contig_110_pilon_pilon-augustus-gene-2.17-mRNA-1	1	GO:0004252,GO:0006508
maker-tulip_contig_547_pilon_pilon-augustus-gene-3.0-mRNA-1	1	GO:0016020,GO:0017156
maker-tulip_contig_112_pilon_pilon-augustus-gene-0.5-mRNA-1	1	GO:0004888,GO:0005216,GO:0016021,GO:0034220,GO:0006811,GO:0016021,GO:0005230,GO:0006811,GO:0016021
augustus_masked-tulip_contig_32_pilon_pilon-processed-gene-0.1-mRNA-1	1	GO:0008271,GO:0008272,GO:0016020,GO:0055085,GO:0008272,GO:0015116,GO:0016021
maker-tulip_contig_827_pilon_pilon-augustus-gene-2.69-mRNA-1	1
maker-tulip_contig_125_pilon_pilon-augustus-gene-0.91-mRNA-1	1	GO:0004252,GO:0006508
maker-tulip_contig_199_pilon_pilon-augustus-gene-4.71-mRNA-1	1
maker-tulip_contig_345_pilon_pilon-augustus-gene-4.0-mRNA-1	1	GO:0016747
maker-tulip_contig_247_pilon_pilon-augustus-gene-2.40-mRNA-1	1	GO:0006629,GO:0016788
maker-tulip_contig_125_pilon_pilon-augustus-gene-0.92-mRNA-1	1	GO:0004252,GO:0006508
maker-tulip_contig_603_pilon_pilon-augustus-gene-1.0-mRNA-1	1	GO:0004089,GO:0008270
maker-tulip_contig_611_pilon_pilon-augustus-gene-3.46-mRNA-1	1	GO:0016021
maker-tulip_contig_531_pilon_pilon-augustus-gene-7.19-mRNA-1	1	GO:0004888,GO:0005216,GO:0016021,GO:0034220,GO:0006811,GO:0016021
maker-tulip_contig_831_pilon_pilon-augustus-gene-4.52-mRNA-1	1
augustus_masked-tulip_contig_168_pilon_pilon-processed-gene-1.38-mRNA-1	1	GO:0005089,GO:0035023,GO:0005515
maker-tulip_contig_182_pilon_pilon-augustus-gene-0.8-mRNA-1	1	GO:0005515
maker-tulip_contig_809_pilon_pilon-augustus-gene-3.12-mRNA-1	1
maker-tulip_contig_340_pilon_pilon-augustus-gene-0.26-mRNA-1	1	GO:0004970,GO:0016020,GO:0005216,GO:0006811,GO:0016020,GO:0038023
maker-tulip_contig_516_pilon_pilon-augustus-gene-2.31-mRNA-1	1	GO:0003924,GO:0005525,GO:0005525,GO:0007165,GO:0016020,GO:0005525
maker-tulip_contig_44_pilon_pilon-augustus-gene-4.10-mRNA-1	1
maker-tulip_contig_153_pilon_pilon-augustus-gene-1.10-mRNA-1	1	GO:0003924,GO:0005525,GO:0005525
maker-tulip_contig_674_pilon_pilon-augustus-gene-4.0-mRNA-1	1
maker-tulip_contig_473_pilon_pilon-augustus-gene-2.15-mRNA-1	1
maker-tulip_contig_284_pilon_pilon-augustus-gene-1.33-mRNA-1	1	GO:0016021,GO:0055085
maker-tulip_contig_244_pilon_pilon-augustus-gene-0.33-mRNA-1	1	GO:0004252,GO:0006508
maker-tulip_contig_175_pilon_pilon-augustus-gene-3.7-mRNA-1	1
augustus_masked-tulip_contig_527_pilon_pilon-processed-gene-3.8-mRNA-1	1
maker-tulip_contig_531_pilon_pilon-augustus-gene-4.25-mRNA-1	1
augustus_masked-tulip_contig_299_pilon_pilon-processed-gene-1.4-mRNA-1	1	GO:0004930,GO:0007186,GO:0016021,GO:0016021
maker-tulip_contig_538_pilon_pilon-augustus-gene-0.63-mRNA-1	1
maker-tulip_contig_827_pilon_pilon-augustus-gene-2.66-mRNA-1	1	GO:0007269,GO:0008021
maker-tulip_contig_407_pilon_pilon-augustus-gene-6.41-mRNA-1	1
maker-tulip_contig_408_pilon_pilon-augustus-gene-0.25-mRNA-1	1
maker-tulip_contig_702_pilon_pilon-augustus-gene-0.48-mRNA-1	1	GO:0004970,GO:0016020
maker-tulip_contig_538_pilon_pilon-augustus-gene-0.62-mRNA-1	1
augustus_masked-tulip_contig_581_pilon_pilon-processed-gene-4.0-mRNA-1	1	GO:0005515,GO:0005515,GO:0007165
augustus_masked-tulip_contig_611_pilon_pilon-processed-gene-3.10-mRNA-1	1	GO:0016021
maker-tulip_contig_407_pilon_pilon-augustus-gene-6.40-mRNA-1	1
maker-tulip_contig_504_pilon_pilon-augustus-gene-3.7-mRNA-1	1
maker-tulip_contig_654_pilon_pilon-augustus-gene-1.68-mRNA-1	1	GO:0005515
augustus_masked-tulip_contig_895_pilon_pilon-processed-gene-3.38-mRNA-1	1	GO:0005215,GO:0016021,GO:0055085,GO:0016021,GO:0022857,GO:0055085,GO:0016020,GO:0022857,GO:0055085
maker-tulip_contig_671_pilon_pilon-augustus-gene-0.41-mRNA-1	1
maker-tulip_contig_807_pilon_pilon-augustus-gene-3.36-mRNA-1	1	GO:0016021,GO:0055085
augustus_masked-tulip_contig_448_pilon_pilon-processed-gene-2.49-mRNA-1	1	GO:0016021,GO:0055085
maker-tulip_contig_603_pilon_pilon-augustus-gene-3.77-mRNA-1	1
maker-tulip_contig_479_pilon_pilon-augustus-gene-0.8-mRNA-1	1	GO:0042981
augustus_masked-tulip_contig_3_pilon_pilon-processed-gene-3.5-mRNA-1	1	GO:0016021
maker-tulip_contig_537_pilon_pilon-augustus-gene-0.45-mRNA-1	1
maker-tulip_contig_759_pilon_pilon-augustus-gene-1.140-mRNA-1	1
augustus_masked-tulip_contig_375_pilon_pilon-processed-gene-1.5-mRNA-1	1	GO:0004930,GO:0007186,GO:0016021,GO:0016021,GO:0004989,GO:0007186,GO:0016021
maker-tulip_contig_104_pilon_pilon-augustus-gene-0.30-mRNA-1	1
maker-tulip_contig_3_pilon_pilon-augustus-gene-3.32-mRNA-1	1	GO:0004930,GO:0007186,GO:0016021,GO:0016021,GO:0007186,GO:0008502,GO:0016021
maker-tulip_contig_327_pilon_pilon-augustus-gene-8.9-mRNA-1	1	GO:0005515
augustus_masked-tulip_contig_504_pilon_pilon-processed-gene-0.8-mRNA-1	1
augustus_masked-tulip_contig_586_pilon_pilon-processed-gene-5.14-mRNA-1	1
augustus_masked-tulip_contig_586_pilon_pilon-processed-gene-9.8-mRNA-1	1	GO:0005515
maker-tulip_contig_372_pilon_pilon-augustus-gene-2.21-mRNA-1	1	GO:0005622,GO:0006915
maker-tulip_contig_327_pilon_pilon-augustus-gene-10.66-mRNA-1	1	GO:0004888,GO:0005216,GO:0016021,GO:0034220,GO:0006811,GO:0016021,GO:0005230,GO:0006811,GO:0016021,GO:0005216,GO:0006811,GO:0016021,GO:0022848,GO:0045211
maker-tulip_contig_120_pilon_pilon-augustus-gene-0.7-mRNA-1	1	GO:0004888,GO:0005216,GO:0016021,GO:0034220,GO:0006811,GO:0016021,GO:0005230,GO:0006811,GO:0016021
maker-tulip_contig_143_pilon_pilon-augustus-gene-0.4-mRNA-1	1
maker-tulip_contig_100_pilon_pilon-augustus-gene-0.6-mRNA-1	1
maker-tulip_contig_121_pilon_pilon-augustus-gene-1.8-mRNA-1	1	GO:0004252,GO:0006508
maker-tulip_contig_58_pilon_pilon-augustus-gene-4.59-mRNA-1	1	GO:0000139
maker-tulip_contig_208_pilon_pilon-augustus-gene-1.124-mRNA-1	1	GO:0003924,GO:0005525,GO:0005525,GO:0007165,GO:0016020,GO:0005525
augustus_masked-tulip_contig_465_pilon_pilon-processed-gene-0.104-mRNA-1	1	GO:0005096,GO:0051056
maker-tulip_contig_327_pilon_pilon-augustus-gene-10.63-mRNA-1	1	GO:0004888,GO:0005216,GO:0016021,GO:0034220,GO:0006811,GO:0016021
maker-tulip_contig_327_pilon_pilon-augustus-gene-1.27-mRNA-1	1
maker-tulip_contig_218_pilon_pilon-augustus-gene-2.0-mRNA-1	1
augustus_masked-tulip_contig_610_pilon_pilon-processed-gene-2.22-mRNA-1	1	GO:0008289,GO:0044233,GO:0051560,GO:1990456
maker-tulip_contig_72_pilon_pilon-augustus-gene-2.22-mRNA-1	1
maker-tulip_contig_69_pilon_pilon-augustus-gene-0.24-mRNA-1	1	GO:0003677
maker-tulip_contig_257_pilon_pilon-augustus-gene-0.1-mRNA-1	1	GO:0003676
maker-tulip_contig_321_pilon_pilon-augustus-gene-1.41-mRNA-1	1
maker-tulip_contig_126_pilon_pilon-augustus-gene-1.59-mRNA-1	1
maker-tulip_contig_236_pilon_pilon-augustus-gene-2.4-mRNA-1	1	GO:0005515
augustus_masked-tulip_contig_843_pilon_pilon-processed-gene-2.13-mRNA-1	1
maker-tulip_contig_52_pilon_pilon-augustus-gene-1.2-mRNA-1	1
maker-tulip_contig_505_pilon_pilon-augustus-gene-3.78-mRNA-1	1	GO:0005328,GO:0005328,GO:0006836,GO:0016021
augustus_masked-tulip_contig_855_pilon_pilon-processed-gene-1.1-mRNA-1	1	GO:0004930,GO:0007186,GO:0016021,GO:0004965,GO:0007186,GO:0016021
maker-tulip_contig_150_pilon_pilon-augustus-gene-0.7-mRNA-1	1
maker-tulip_contig_632_pilon_pilon-augustus-gene-3.23-mRNA-1	1	GO:0004970,GO:0016020,GO:0005216,GO:0006811,GO:0016020,GO:0038023
augustus_masked-tulip_contig_860_pilon_pilon-processed-gene-0.5-mRNA-1	1	GO:0003714,GO:0006351
augustus_masked-tulip_contig_465_pilon_pilon-processed-gene-0.100-mRNA-1	1
maker-tulip_contig_831_pilon_pilon-augustus-gene-0.52-mRNA-1	1	GO:0016020
maker-tulip_contig_632_pilon_pilon-augustus-gene-3.36-mRNA-1	1	GO:0005515
augustus_masked-tulip_contig_827_pilon_pilon-processed-gene-1.9-mRNA-1	1	GO:0004970,GO:0016020
maker-tulip_contig_178_pilon_pilon-augustus-gene-0.60-mRNA-1	1	GO:0004383,GO:0006182,GO:0009190,GO:0016849,GO:0035556,GO:0004672,GO:0006468,GO:0004672,GO:0005524,GO:0006468
maker-tulip_contig_4_pilon_pilon-augustus-gene-0.3-mRNA-1	1	GO:0006508,GO:0008235,GO:0008239,GO:0016805,GO:0006508,GO:0016805
maker-tulip_contig_547_pilon_pilon-augustus-gene-3.1-mRNA-1	1	GO:0005544,GO:0006887
maker-tulip_contig_807_pilon_pilon-augustus-gene-3.76-mRNA-1	1	GO:0052689
maker-tulip_contig_43_pilon_pilon-augustus-gene-0.30-mRNA-1	1
maker-tulip_contig_623_pilon_pilon-augustus-gene-5.100-mRNA-1	1	GO:0006629,GO:0052689
maker-tulip_contig_125_pilon_pilon-augustus-gene-0.95-mRNA-1	1	GO:0004252,GO:0006508
maker-tulip_contig_125_pilon_pilon-augustus-gene-0.94-mRNA-1	1	GO:0004252,GO:0006508
maker-tulip_contig_85_pilon_pilon-augustus-gene-1.21-mRNA-1	1	GO:0004725,GO:0016311,GO:0016311,GO:0016791,GO:0008138,GO:0016311
augustus_masked-tulip_contig_837_pilon_pilon-processed-gene-0.9-mRNA-1	1	GO:0003824,GO:0050662
maker-tulip_contig_192_pilon_pilon-augustus-gene-0.2-mRNA-1	1	GO:0009055,GO:0020037
maker-tulip_contig_307_pilon_pilon-augustus-gene-1.173-mRNA-1	1
maker-tulip_contig_168_pilon_pilon-augustus-gene-1.8-mRNA-1	1
maker-tulip_contig_4_pilon_pilon-augustus-gene-1.16-mRNA-1	1
maker-tulip_contig_809_pilon_pilon-augustus-gene-4.5-mRNA-1	1	GO:0004735,GO:0006561,GO:0055114,GO:0055114
maker-tulip_contig_102_pilon_pilon-augustus-gene-0.44-mRNA-1	1	GO:0009166,GO:0016787
maker-tulip_contig_938_pilon_pilon-augustus-gene-0.0-mRNA-1	1	GO:0009166,GO:0016787
maker-tulip_contig_694_pilon_pilon-augustus-gene-0.9-mRNA-1	1	GO:0016021
augustus_masked-tulip_contig_145_pilon_pilon-processed-gene-4.3-mRNA-1	1
maker-tulip_contig_236_pilon_pilon-augustus-gene-7.96-mRNA-1	1
maker-tulip_contig_130_pilon_pilon-augustus-gene-0.4-mRNA-1	1	GO:0004846,GO:0006144,GO:0055114
maker-tulip_contig_105_pilon_pilon-augustus-gene-0.19-mRNA-1	1	GO:0006464,GO:0009249,GO:0033819
maker-tulip_contig_192_pilon_pilon-augustus-gene-1.183-mRNA-1	1	GO:0003677,GO:0006355,GO:0043565
augustus_masked-tulip_contig_506_pilon_pilon-processed-gene-1.23-mRNA-1	1	GO:0003677,GO:0003677,GO:0006310,GO:0015074
maker-tulip_contig_247_pilon_pilon-augustus-gene-2.38-mRNA-1	1	GO:0006629,GO:0016788
augustus_masked-tulip_contig_420_pilon_pilon-processed-gene-2.27-mRNA-1	1	GO:0005215,GO:0016021,GO:0055085,GO:0016021,GO:0022857,GO:0055085
maker-tulip_contig_707_pilon_pilon-augustus-gene-0.71-mRNA-1	1	GO:0016758
augustus_masked-tulip_contig_145_pilon_pilon-processed-gene-5.9-mRNA-1	1
augustus_masked-tulip_contig_454_pilon_pilon-processed-gene-1.5-mRNA-1	1	GO:0006486,GO:0008417,GO:0016020
maker-tulip_contig_693_pilon_pilon-augustus-gene-1.19-mRNA-1	1	GO:0016021
maker-tulip_contig_819_pilon_pilon-augustus-gene-2.17-mRNA-1	1	GO:0005509,GO:0016491,GO:0055114,GO:0016175,GO:0042554
maker-tulip_contig_380_pilon_pilon-augustus-gene-2.11-mRNA-1	1	GO:0047617
maker-tulip_contig_473_pilon_pilon-augustus-gene-0.1-mRNA-1	1	GO:0003824,GO:0055114,GO:0031177,GO:0016740,GO:0016491,GO:0009058,GO:0016788,GO:0004312
maker-tulip_contig_272_pilon_pilon-augustus-gene-5.93-mRNA-1	1
augustus_masked-tulip_contig_674_pilon_pilon-processed-gene-5.11-mRNA-1	1
augustus_masked-tulip_contig_82_pilon_pilon-processed-gene-1.3-mRNA-1	1	GO:0003676,GO:0003676,GO:0006139,GO:0008408
maker-tulip_contig_271_pilon_pilon-augustus-gene-2.30-mRNA-1	1	GO:0005515
augustus_masked-tulip_contig_131_pilon_pilon-processed-gene-0.4-mRNA-1	1	GO:0004190,GO:0006508
maker-tulip_contig_323_pilon_pilon-augustus-gene-0.23-mRNA-1	1	GO:0016746
maker-tulip_contig_673_pilon_pilon-augustus-gene-0.52-mRNA-1	1	GO:0016021,GO:0055085
maker-tulip_contig_407_pilon_pilon-augustus-gene-5.30-mRNA-1	1	GO:0005524,GO:0016021,GO:0005524,GO:0016021,GO:0042626,GO:0055085
maker-tulip_contig_507_pilon_pilon-augustus-gene-0.89-mRNA-1	1	GO:0003779,GO:0007015,GO:0007300,GO:0051015
augustus_masked-tulip_contig_505_pilon_pilon-processed-gene-1.24-mRNA-1	1	GO:0016757
augustus_masked-tulip_contig_362_pilon_pilon-processed-gene-8.35-mRNA-1	1	GO:0000287,GO:0016616,GO:0051287,GO:0055114,GO:0016616,GO:0055114,GO:0004450,GO:0006102,GO:0055114
maker-tulip_contig_4_pilon_pilon-augustus-gene-1.5-mRNA-1	1	GO:0004016,GO:0005886,GO:0006171,GO:0009190,GO:0016849,GO:0035556
maker-tulip_contig_212_pilon_pilon-augustus-gene-1.102-mRNA-1	1	GO:0016020,GO:0022857,GO:0055085
maker-tulip_contig_75_pilon_pilon-augustus-gene-1.5-mRNA-1	1
maker-tulip_contig_628_pilon_pilon-augustus-gene-4.52-mRNA-1	1
augustus_masked-tulip_contig_237_pilon_pilon-processed-gene-0.19-mRNA-1	1
augustus_masked-tulip_contig_778_pilon_pilon-processed-gene-1.32-mRNA-1	1
maker-tulip_contig_701_pilon_pilon-augustus-gene-0.4-mRNA-1	1
augustus_masked-tulip_contig_715_pilon_pilon-processed-gene-5.30-mRNA-1	1	GO:0003777,GO:0005524,GO:0007018,GO:0003777,GO:0007018,GO:0003777,GO:0005524,GO:0007018,GO:0008017
augustus_masked-tulip_contig_555_pilon_pilon-processed-gene-2.109-mRNA-1	1	GO:0003676
maker-tulip_contig_479_pilon_pilon-augustus-gene-0.20-mRNA-1	1	GO:0005615
augustus_masked-tulip_contig_46_pilon_pilon-processed-gene-0.5-mRNA-1	1	GO:0005515
maker-tulip_contig_451_pilon_pilon-augustus-gene-1.31-mRNA-1	1	GO:0003924,GO:0005525,GO:0005525
maker-tulip_contig_907_pilon_pilon-augustus-gene-4.9-mRNA-1	1	GO:0016021,GO:0022857,GO:0055085
maker-tulip_contig_199_pilon_pilon-augustus-gene-3.23-mRNA-1	1
maker-tulip_contig_659_pilon_pilon-augustus-gene-0.9-mRNA-1	1	GO:0003676
augustus_masked-tulip_contig_426_pilon_pilon-processed-gene-1.2-mRNA-1	1
maker-tulip_contig_149_pilon_pilon-augustus-gene-0.2-mRNA-1	1	GO:0007218,GO:0030141
augustus_masked-tulip_contig_362_pilon_pilon-processed-gene-1.9-mRNA-1	1
maker-tulip_contig_490_pilon_pilon-augustus-gene-0.10-mRNA-1	1	GO:0004930,GO:0007186,GO:0016021,GO:0016021
maker-tulip_contig_149_pilon_pilon-augustus-gene-0.0-mRNA-1	1
maker-tulip_contig_362_pilon_pilon-augustus-gene-1.32-mRNA-1	1	GO:0005515
maker-tulip_contig_870_pilon_pilon-augustus-gene-3.2-mRNA-1	1
augustus_masked-tulip_contig_854_pilon_pilon-processed-gene-1.72-mRNA-1	1	GO:0003676
augustus_masked-tulip_contig_855_pilon_pilon-processed-gene-1.16-mRNA-1	1	GO:0003676
augustus_masked-tulip_contig_244_pilon_pilon-processed-gene-0.8-mRNA-1	1	GO:0004190,GO:0006508
maker-tulip_contig_529_pilon_pilon-augustus-gene-1.3-mRNA-1	1	GO:0003924,GO:0005525,GO:0005525
maker-tulip_contig_556_pilon_pilon-augustus-gene-0.7-mRNA-1	1	GO:0003779,GO:0016192,GO:0045010
maker-tulip_contig_247_pilon_pilon-augustus-gene-2.112-mRNA-1	1	GO:0005506,GO:0016705,GO:0020037,GO:0055114
augustus_masked-tulip_contig_753_pilon_pilon-processed-gene-1.32-mRNA-1	1
maker-tulip_contig_860_pilon_pilon-augustus-gene-6.22-mRNA-1	1
maker-tulip_contig_490_pilon_pilon-augustus-gene-2.4-mRNA-1	1	GO:0016614,GO:0050660,GO:0055114,GO:0016614,GO:0055114
maker-tulip_contig_323_pilon_pilon-augustus-gene-2.21-mRNA-1	1	GO:0046983
augustus_masked-tulip_contig_327_pilon_pilon-processed-gene-6.26-mRNA-1	1
augustus_masked-tulip_contig_3_pilon_pilon-processed-gene-0.44-mRNA-1	1	GO:0003700,GO:0005634,GO:0006355,GO:0008270,GO:0043565,GO:0006355,GO:0008270
maker-tulip_contig_559_pilon_pilon-augustus-gene-2.0-mRNA-1	1
augustus_masked-tulip_contig_327_pilon_pilon-processed-gene-6.25-mRNA-1	1
augustus_masked-tulip_contig_318_pilon_pilon-processed-gene-0.76-mRNA-1	1	GO:0003841,GO:0008654,GO:0016020,GO:0016746
maker-tulip_contig_560_pilon_pilon-augustus-gene-0.39-mRNA-1	1
maker-tulip_contig_159_pilon_pilon-augustus-gene-1.0-mRNA-1	1	GO:0003924,GO:0005525,GO:0005525,GO:0007165,GO:0016020
augustus_masked-tulip_contig_145_pilon_pilon-processed-gene-1.14-mRNA-1	1	GO:0003677,GO:0003677,GO:0006310,GO:0015074
augustus_masked-tulip_contig_252_pilon_pilon-processed-gene-0.36-mRNA-1	1
maker-tulip_contig_121_pilon_pilon-augustus-gene-0.35-mRNA-1	1
maker-tulip_contig_503_pilon_pilon-augustus-gene-1.41-mRNA-1	1	GO:0016021
maker-tulip_contig_610_pilon_pilon-augustus-gene-1.29-mRNA-1	1	GO:0005216,GO:0006811,GO:0016020,GO:0055085,GO:0005245,GO:0005891,GO:0070588
maker-tulip_contig_610_pilon_pilon-augustus-gene-1.28-mRNA-1	1	GO:0005216,GO:0006811,GO:0016020,GO:0055085,GO:0005509,GO:0005245,GO:0005891,GO:0070588
maker-tulip_contig_881_pilon_pilon-augustus-gene-1.1-mRNA-1	1	GO:0005506,GO:0016705,GO:0020037,GO:0055114,GO:0016705,GO:0055114
augustus_masked-tulip_contig_662_pilon_pilon-processed-gene-0.2-mRNA-1	1	GO:0005515
maker-tulip_contig_79_pilon_pilon-augustus-gene-0.10-mRNA-1	1	GO:0005516,GO:0006813,GO:0015269,GO:0016021,GO:0006813,GO:0016021,GO:0016286
maker-tulip_contig_705_pilon_pilon-augustus-gene-0.4-mRNA-1	1	GO:0004888,GO:0007166,GO:0016021,GO:0004930,GO:0007186,GO:0016021
augustus_masked-tulip_contig_126_pilon_pilon-processed-gene-0.47-mRNA-1	1
maker-tulip_contig_182_pilon_pilon-augustus-gene-1.59-mRNA-1	1
maker-tulip_contig_806_pilon_pilon-augustus-gene-2.29-mRNA-1	1
augustus_masked-tulip_contig_474_pilon_pilon-processed-gene-5.10-mRNA-1	1
maker-tulip_contig_839_pilon_pilon-augustus-gene-1.49-mRNA-1	1
maker-tulip_contig_414_pilon_pilon-augustus-gene-0.18-mRNA-1	1
augustus_masked-tulip_contig_86_pilon_pilon-processed-gene-1.31-mRNA-1	1
maker-tulip_contig_926_pilon_pilon-augustus-gene-0.26-mRNA-1	1
maker-tulip_contig_362_pilon_pilon-augustus-gene-7.22-mRNA-1	1	GO:0005506,GO:0016705,GO:0020037,GO:0055114,GO:0016705,GO:0055114
maker-tulip_contig_334_pilon_pilon-augustus-gene-4.66-mRNA-1	1	GO:0005515,GO:0006520
maker-tulip_contig_710_pilon_pilon-augustus-gene-0.88-mRNA-1	1	GO:0005509
augustus_masked-tulip_contig_303_pilon_pilon-processed-gene-0.3-mRNA-1	1	GO:0006812,GO:0015299,GO:0016021,GO:0006814,GO:0006885,GO:0015385,GO:0016021,GO:0055085,GO:0006812,GO:0015299,GO:0016021,GO:0055085
maker-tulip_contig_303_pilon_pilon-augustus-gene-0.29-mRNA-1	1
maker-tulip_contig_61_pilon_pilon-augustus-gene-0.2-mRNA-1	1	GO:0016021,GO:0022857,GO:0055085
maker-tulip_contig_806_pilon_pilon-augustus-gene-0.6-mRNA-1	1
maker-tulip_contig_2_pilon_pilon-augustus-gene-7.2-mRNA-1	1	GO:0003824,GO:0016791
maker-tulip_contig_407_pilon_pilon-augustus-gene-0.71-mRNA-1	1
maker-tulip_contig_781_pilon_pilon-augustus-gene-6.45-mRNA-1	1
maker-tulip_contig_323_pilon_pilon-augustus-gene-6.26-mRNA-1	1
maker-tulip_contig_236_pilon_pilon-augustus-gene-8.40-mRNA-1	1	GO:0005515
augustus_masked-tulip_contig_394_pilon_pilon-processed-gene-1.34-mRNA-1	1	GO:0005452,GO:0006820,GO:0016020,GO:0006820,GO:0016021,GO:0006820,GO:0008509,GO:0016021
maker-tulip_contig_843_pilon_pilon-augustus-gene-7.13-mRNA-1	1	GO:0016021,GO:0016192
augustus_masked-tulip_contig_327_pilon_pilon-processed-gene-2.6-mRNA-1	1
maker-tulip_contig_4_pilon_pilon-augustus-gene-0.5-mRNA-1	1
augustus_masked-tulip_contig_272_pilon_pilon-processed-gene-4.72-mRNA-1	1
maker-tulip_contig_392_pilon_pilon-augustus-gene-0.19-mRNA-1	1	GO:0016021,GO:0022857,GO:0055085
maker-tulip_contig_454_pilon_pilon-augustus-gene-1.12-mRNA-1	1	GO:0004089,GO:0008270
maker-tulip_contig_584_pilon_pilon-augustus-gene-0.5-mRNA-1	1
maker-tulip_contig_674_pilon_pilon-augustus-gene-9.25-mRNA-1	1
maker-tulip_contig_318_pilon_pilon-augustus-gene-3.23-mRNA-1	1	GO:0080019
augustus_masked-tulip_contig_272_pilon_pilon-processed-gene-4.77-mRNA-1	1	GO:0022857
maker-tulip_contig_147_pilon_pilon-augustus-gene-0.45-mRNA-1	1	GO:0006355
augustus_masked-tulip_contig_281_pilon_pilon-processed-gene-5.39-mRNA-1	1	GO:0003676,GO:0006355
augustus_masked-tulip_contig_609_pilon_pilon-processed-gene-0.0-mRNA-1	1
maker-tulip_contig_916_pilon_pilon-augustus-gene-2.0-mRNA-1	1	GO:0015078,GO:0015991,GO:0033179
maker-tulip_contig_346_pilon_pilon-augustus-gene-0.14-mRNA-1	1
maker-tulip_contig_527_pilon_pilon-augustus-gene-0.33-mRNA-1	1	GO:0016021
maker-tulip_contig_168_pilon_pilon-augustus-gene-0.10-mRNA-1	1
augustus_masked-tulip_contig_934_pilon_pilon-processed-gene-0.25-mRNA-1	1
augustus_masked-tulip_contig_80_pilon_pilon-processed-gene-0.26-mRNA-1	1
augustus_masked-tulip_contig_669_pilon_pilon-processed-gene-1.12-mRNA-1	1	GO:0016491,GO:0055114
maker-tulip_contig_289_pilon_pilon-augustus-gene-0.47-mRNA-1	1	GO:0016758
maker-tulip_contig_69_pilon_pilon-augustus-gene-1.21-mRNA-1	1
augustus_masked-tulip_contig_514_pilon_pilon-processed-gene-1.65-mRNA-1	1	GO:0005515
augustus_masked-tulip_contig_161_pilon_pilon-processed-gene-0.21-mRNA-1	1	GO:0016020
augustus_masked-tulip_contig_407_pilon_pilon-processed-gene-5.19-mRNA-1	1	GO:0005515
maker-tulip_contig_837_pilon_pilon-augustus-gene-7.61-mRNA-1	1	GO:0046983
maker-tulip_contig_212_pilon_pilon-augustus-gene-1.117-mRNA-1	1	GO:0003774,GO:0005524,GO:0016459,GO:0005515,GO:0003774,GO:0016459
maker-tulip_contig_738_pilon_pilon-augustus-gene-0.10-mRNA-1	1	GO:0000226,GO:0015630
maker-tulip_contig_691_pilon_pilon-augustus-gene-2.85-mRNA-1	1	GO:0005515
maker-tulip_contig_381_pilon_pilon-augustus-gene-0.100-mRNA-1	1	GO:0003824
maker-tulip_contig_604_pilon_pilon-augustus-gene-3.29-mRNA-1	1	GO:0004674
augustus_masked-tulip_contig_938_pilon_pilon-processed-gene-0.9-mRNA-1	1
maker-tulip_contig_560_pilon_pilon-augustus-gene-2.29-mRNA-1	1
maker-tulip_contig_519_pilon_pilon-augustus-gene-2.54-mRNA-1	1	GO:0005515
maker-tulip_contig_392_pilon_pilon-augustus-gene-0.34-mRNA-1	1
maker-tulip_contig_558_pilon_pilon-augustus-gene-0.3-mRNA-1	1
maker-tulip_contig_774_pilon_pilon-augustus-gene-0.139-mRNA-1	1
maker-tulip_contig_2_pilon_pilon-augustus-gene-8.25-mRNA-1	1	GO:0004672,GO:0005524,GO:0006468
maker-tulip_contig_441_pilon_pilon-augustus-gene-9.27-mRNA-1	1	GO:0022857
maker-tulip_contig_236_pilon_pilon-augustus-gene-7.59-mRNA-1	1	GO:0005515
maker-tulip_contig_773_pilon_pilon-augustus-gene-3.35-mRNA-1	1
maker-tulip_contig_318_pilon_pilon-augustus-gene-3.9-mRNA-1	1
maker-tulip_contig_745_pilon_pilon-augustus-gene-1.35-mRNA-1	1
maker-tulip_contig_468_pilon_pilon-augustus-gene-3.56-mRNA-1	1	GO:0016020
maker-tulip_contig_247_pilon_pilon-augustus-gene-2.116-mRNA-1	1
maker-tulip_contig_479_pilon_pilon-augustus-gene-1.30-mRNA-1	1
maker-tulip_contig_103_pilon_pilon-augustus-gene-0.14-mRNA-1	1	GO:0043022
augustus_masked-tulip_contig_190_pilon_pilon-processed-gene-2.39-mRNA-1	1
maker-tulip_contig_934_pilon_pilon-augustus-gene-0.14-mRNA-1	1	GO:0080019
augustus_masked-tulip_contig_198_pilon_pilon-processed-gene-1.9-mRNA-1	1	GO:0009190,GO:0016849,GO:0035556
maker-tulip_contig_110_pilon_pilon-augustus-gene-3.24-mRNA-1	1
maker-tulip_contig_145_pilon_pilon-augustus-gene-6.12-mRNA-1	1	GO:0004143,GO:0007165,GO:0016301,GO:0005515,GO:0004143,GO:0007205
maker-tulip_contig_327_pilon_pilon-augustus-gene-10.51-mRNA-1	1
maker-tulip_contig_318_pilon_pilon-augustus-gene-0.34-mRNA-1	1	GO:0003954,GO:0005739,GO:0008137
maker-tulip_contig_195_pilon_pilon-augustus-gene-0.43-mRNA-1	1	GO:0003824,GO:0016747
maker-tulip_contig_113_pilon_pilon-augustus-gene-0.35-mRNA-1	1	GO:0006662,GO:0015035,GO:0045454,GO:0045454
maker-tulip_contig_55_pilon_pilon-augustus-gene-0.64-mRNA-1	1
maker-tulip_contig_33_pilon_pilon-augustus-gene-3.58-mRNA-1	1	GO:0003824,GO:0050662
maker-tulip_contig_392_pilon_pilon-augustus-gene-0.22-mRNA-1	1	GO:0006644,GO:0016746,GO:0016746
augustus_masked-tulip_contig_515_pilon_pilon-processed-gene-1.25-mRNA-1	1	GO:0003824,GO:0004421,GO:0008299
maker-tulip_contig_862_pilon_pilon-augustus-gene-1.57-mRNA-1	1
maker-tulip_contig_707_pilon_pilon-augustus-gene-0.5-mRNA-1	1	GO:0005509,GO:0005544
maker-tulip_contig_44_pilon_pilon-augustus-gene-2.27-mRNA-1	1	GO:0003676,GO:0003723
maker-tulip_contig_74_pilon_pilon-augustus-gene-0.48-mRNA-1	1	GO:0005525,GO:0005525,GO:0005622,GO:0006886
augustus_masked-tulip_contig_477_pilon_pilon-processed-gene-0.18-mRNA-1	1	GO:0004672,GO:0005524,GO:0006468,GO:0004672,GO:0006468
maker-tulip_contig_196_pilon_pilon-augustus-gene-2.8-mRNA-1	1	GO:0032559,GO:0071900
maker-tulip_contig_429_pilon_pilon-augustus-gene-1.4-mRNA-1	1
maker-tulip_contig_515_pilon_pilon-augustus-gene-5.5-mRNA-1	1	GO:0016021,GO:0055085
maker-tulip_contig_316_pilon_pilon-augustus-gene-2.6-mRNA-1	1	GO:0003824
augustus_masked-tulip_contig_680_pilon_pilon-processed-gene-0.18-mRNA-1	1
maker-tulip_contig_698_pilon_pilon-augustus-gene-3.9-mRNA-1	1	GO:0005220,GO:0005783,GO:0006816,GO:0070679,GO:0016020,GO:0006816,GO:0005262,GO:0016020,GO:0070588
augustus_masked-tulip_contig_798_pilon_pilon-processed-gene-0.10-mRNA-1	1
augustus_masked-tulip_contig_842_pilon_pilon-processed-gene-0.94-mRNA-1	1	GO:0000159,GO:0007165,GO:0019888
maker-tulip_contig_360_pilon_pilon-augustus-gene-2.80-mRNA-1	1	GO:0004725,GO:0006470,GO:0016311,GO:0016791,GO:0004725,GO:0016311
maker-tulip_contig_54_pilon_pilon-augustus-gene-1.13-mRNA-1	1	GO:0000166,GO:0016021,GO:0000287,GO:0004012,GO:0005524,GO:0015914,GO:0016021
maker-tulip_contig_762_pilon_pilon-augustus-gene-0.16-mRNA-1	1	GO:0005515
maker-tulip_contig_407_pilon_pilon-augustus-gene-0.64-mRNA-1	1
maker-tulip_contig_474_pilon_pilon-augustus-gene-6.7-mRNA-1	1
augustus_masked-tulip_contig_101_pilon_pilon-processed-gene-0.3-mRNA-1	1
augustus_masked-tulip_contig_35_pilon_pilon-processed-gene-0.133-mRNA-1	1	GO:0004930,GO:0007186,GO:0016021,GO:0016021,GO:0008528
maker-tulip_contig_333_pilon_pilon-augustus-gene-3.119-mRNA-1	1	GO:0003924,GO:0005525,GO:0005525
maker-tulip_contig_356_pilon_pilon-augustus-gene-1.44-mRNA-1	1	GO:0016021,GO:0055085
maker-tulip_contig_711_pilon_pilon-augustus-gene-1.20-mRNA-1	1	GO:0016020,GO:0030001,GO:0046873,GO:0055085
maker-tulip_contig_42_pilon_pilon-augustus-gene-1.2-mRNA-1	1	GO:0000030,GO:0016757
augustus_masked-tulip_contig_673_pilon_pilon-processed-gene-1.4-mRNA-1	1	GO:0016491
maker-tulip_contig_58_pilon_pilon-augustus-gene-5.24-mRNA-1	1	GO:0003700,GO:0006355,GO:0006986
augustus_masked-tulip_contig_693_pilon_pilon-processed-gene-2.13-mRNA-1	1
maker-tulip_contig_168_pilon_pilon-augustus-gene-1.5-mRNA-1	1	GO:0005509
augustus_masked-tulip_contig_474_pilon_pilon-processed-gene-1.80-mRNA-1	1	GO:0016020,GO:0016021
maker-tulip_contig_673_pilon_pilon-augustus-gene-1.67-mRNA-1	1	GO:0004784,GO:0055114,GO:0006801,GO:0046872
maker-tulip_contig_745_pilon_pilon-augustus-gene-2.3-mRNA-1	1	GO:0004325,GO:0006783
maker-tulip_contig_566_pilon_pilon-augustus-gene-0.2-mRNA-1	1
maker-tulip_contig_668_pilon_pilon-augustus-gene-1.0-mRNA-1	1
augustus_masked-tulip_contig_909_pilon_pilon-processed-gene-0.1-mRNA-1	1	GO:0005515
maker-tulip_contig_673_pilon_pilon-augustus-gene-1.22-mRNA-1	1	GO:0005509
augustus_masked-tulip_contig_46_pilon_pilon-processed-gene-2.14-mRNA-1	1	GO:0004609,GO:0008654
maker-tulip_contig_531_pilon_pilon-augustus-gene-4.28-mRNA-1	1	GO:0003777,GO:0005524,GO:0007018,GO:0003777,GO:0007018,GO:0003777,GO:0005524,GO:0007018,GO:0008017
augustus_masked-tulip_contig_597_pilon_pilon-processed-gene-2.11-mRNA-1	1
maker-tulip_contig_516_pilon_pilon-augustus-gene-3.45-mRNA-1	1	GO:0046854,GO:0048015
maker-tulip_contig_102_pilon_pilon-augustus-gene-0.39-mRNA-1	1	GO:0016020
maker-tulip_contig_507_pilon_pilon-augustus-gene-2.26-mRNA-1	1
augustus_masked-tulip_contig_58_pilon_pilon-processed-gene-2.6-mRNA-1	1	GO:0004198,GO:0005622,GO:0006508
augustus_masked-tulip_contig_603_pilon_pilon-processed-gene-4.51-mRNA-1	1
maker-tulip_contig_704_pilon_pilon-augustus-gene-1.7-mRNA-1	1	GO:0005515,GO:0005856
maker-tulip_contig_110_pilon_pilon-augustus-gene-3.17-mRNA-1	1	GO:0005515,GO:0006886
augustus_masked-tulip_contig_85_pilon_pilon-processed-gene-1.12-mRNA-1	1
augustus_masked-tulip_contig_339_pilon_pilon-processed-gene-3.5-mRNA-1	1
maker-tulip_contig_208_pilon_pilon-augustus-gene-1.82-mRNA-1	1	GO:0004930,GO:0007186,GO:0016021,GO:0016021
maker-tulip_contig_44_pilon_pilon-augustus-gene-3.19-mRNA-1	1
maker-tulip_contig_407_pilon_pilon-augustus-gene-9.43-mRNA-1	1	GO:0003676
maker-tulip_contig_43_pilon_pilon-augustus-gene-5.7-mRNA-1	1
maker-tulip_contig_523_pilon_pilon-augustus-gene-0.108-mRNA-1	1
augustus_masked-tulip_contig_55_pilon_pilon-processed-gene-0.10-mRNA-1	1
augustus_masked-tulip_contig_468_pilon_pilon-processed-gene-3.112-mRNA-1	1	GO:0016787
maker-tulip_contig_276_pilon_pilon-augustus-gene-3.2-mRNA-1	1	GO:0003677,GO:0003707,GO:0005634,GO:0006355,GO:0006355,GO:0008270,GO:0003700,GO:0005634,GO:0006355,GO:0008270,GO:0043565
augustus_masked-tulip_contig_777_pilon_pilon-processed-gene-0.20-mRNA-1	1
augustus_masked-tulip_contig_360_pilon_pilon-processed-gene-2.103-mRNA-1	1	GO:0016491,GO:0055114
maker-tulip_contig_482_pilon_pilon-augustus-gene-2.10-mRNA-1	1	GO:0006470,GO:0008138,GO:0016311,GO:0016791,GO:0008138,GO:0016311
maker-tulip_contig_655_pilon_pilon-augustus-gene-0.28-mRNA-1	1	GO:0004521,GO:0090305
augustus_masked-tulip_contig_468_pilon_pilon-processed-gene-2.47-mRNA-1	1	GO:0003676
maker-tulip_contig_360_pilon_pilon-augustus-gene-2.65-mRNA-1	1	GO:0016491,GO:0016620,GO:0055114,GO:0016491,GO:0055114
augustus_masked-tulip_contig_85_pilon_pilon-processed-gene-1.14-mRNA-1	1	GO:0005509,GO:0005856,GO:0005515
maker-tulip_contig_626_pilon_pilon-augustus-gene-1.55-mRNA-1	1	GO:0005515,GO:0005515,GO:0005543
augustus_masked-tulip_contig_529_pilon_pilon-processed-gene-1.55-mRNA-1	1
maker-tulip_contig_45_pilon_pilon-augustus-gene-0.19-mRNA-1	1
augustus_masked-tulip_contig_407_pilon_pilon-processed-gene-3.68-mRNA-1	1	GO:0005524,GO:0016021,GO:0005524,GO:0016887,GO:0005524,GO:0016021,GO:0042626,GO:0055085
augustus_masked-tulip_contig_529_pilon_pilon-processed-gene-1.74-mRNA-1	1	GO:0016020,GO:0022857,GO:0055085
maker-tulip_contig_597_pilon_pilon-augustus-gene-0.11-mRNA-1	1	GO:0019991
maker-tulip_contig_323_pilon_pilon-augustus-gene-7.14-mRNA-1	1	GO:0004497,GO:0005506,GO:0009072,GO:0055114,GO:0016714,GO:0055114,GO:0004511,GO:0042423,GO:0055114
augustus_masked-tulip_contig_586_pilon_pilon-processed-gene-4.71-mRNA-1	1
maker-tulip_contig_272_pilon_pilon-augustus-gene-4.11-mRNA-1	1
augustus_masked-tulip_contig_420_pilon_pilon-processed-gene-2.13-mRNA-1	1	GO:0003676,GO:0019722
augustus_masked-tulip_contig_454_pilon_pilon-processed-gene-0.2-mRNA-1	1	GO:0005246
augustus_masked-tulip_contig_357_pilon_pilon-processed-gene-0.10-mRNA-1	1	GO:0008934,GO:0046855,GO:0046854
maker-tulip_contig_521_pilon_pilon-augustus-gene-0.1-mRNA-1	1	GO:0016021
maker-tulip_contig_110_pilon_pilon-augustus-gene-0.12-mRNA-1	1	GO:0005789,GO:0007029
augustus_masked-tulip_contig_37_pilon_pilon-processed-gene-0.0-mRNA-1	1	GO:0016021,GO:0022857,GO:0055085
augustus_masked-tulip_contig_454_pilon_pilon-processed-gene-0.1-mRNA-1	1	GO:0005246,GO:0005515
augustus_masked-tulip_contig_773_pilon_pilon-processed-gene-1.6-mRNA-1	1	GO:0016787
maker-tulip_contig_474_pilon_pilon-augustus-gene-0.84-mRNA-1	1	GO:0004672,GO:0005524,GO:0006468,GO:0005524,GO:0004672,GO:0006468
maker-tulip_contig_697_pilon_pilon-augustus-gene-1.22-mRNA-1	1	GO:0005515
maker-tulip_contig_270_pilon_pilon-augustus-gene-1.9-mRNA-1	1
maker-tulip_contig_817_pilon_pilon-augustus-gene-0.1-mRNA-1	1
maker-tulip_contig_309_pilon_pilon-augustus-gene-0.27-mRNA-1	1
maker-tulip_contig_3_pilon_pilon-augustus-gene-5.18-mRNA-1	1	GO:0005096,GO:0043087
augustus_masked-tulip_contig_716_pilon_pilon-processed-gene-0.5-mRNA-1	1	GO:0005086,GO:0032012
maker-tulip_contig_303_pilon_pilon-augustus-gene-1.65-mRNA-1	1	GO:0006886
maker-tulip_contig_81_pilon_pilon-augustus-gene-0.33-mRNA-1	1	GO:0005509
maker-tulip_contig_800_pilon_pilon-augustus-gene-1.21-mRNA-1	1	GO:0005509,GO:0005544
maker-tulip_contig_264_pilon_pilon-augustus-gene-0.10-mRNA-1	1
maker-tulip_contig_626_pilon_pilon-augustus-gene-1.35-mRNA-1	1
augustus_masked-tulip_contig_490_pilon_pilon-processed-gene-2.82-mRNA-1	1
maker-tulip_contig_417_pilon_pilon-augustus-gene-1.9-mRNA-1	1	GO:0016307,GO:0046488
maker-tulip_contig_715_pilon_pilon-augustus-gene-5.60-mRNA-1	1
maker-tulip_contig_59_pilon_pilon-augustus-gene-2.42-mRNA-1	1	GO:0046856
maker-tulip_contig_147_pilon_pilon-augustus-gene-1.36-mRNA-1	1
maker-tulip_contig_312_pilon_pilon-augustus-gene-0.12-mRNA-1	1
maker-tulip_contig_781_pilon_pilon-augustus-gene-1.44-mRNA-1	1	GO:0016020
maker-tulip_contig_603_pilon_pilon-augustus-gene-1.1-mRNA-1	1
maker-tulip_contig_123_pilon_pilon-augustus-gene-0.72-mRNA-1	1
maker-tulip_contig_827_pilon_pilon-augustus-gene-2.64-mRNA-1	1	GO:0004181,GO:0006508,GO:0008270
maker-tulip_contig_691_pilon_pilon-augustus-gene-1.6-mRNA-1	1
maker-tulip_contig_1_pilon_pilon-augustus-gene-5.35-mRNA-1	1	GO:0005215,GO:0016021,GO:0055085,GO:0016021,GO:0022857,GO:0055085,GO:0016020,GO:0022857,GO:0055085
augustus_masked-tulip_contig_199_pilon_pilon-processed-gene-5.33-mRNA-1	1	GO:0005509
maker-tulip_contig_690_pilon_pilon-augustus-gene-0.27-mRNA-1	1	GO:0003676,GO:0008270,GO:0004190,GO:0006508
maker-tulip_contig_46_pilon_pilon-augustus-gene-0.26-mRNA-1	1	GO:0016491,GO:0051537,GO:0055114
maker-tulip_contig_237_pilon_pilon-augustus-gene-0.27-mRNA-1	1	GO:0016021
maker-tulip_contig_531_pilon_pilon-augustus-gene-0.48-mRNA-1	1	GO:0016021,GO:0055085
augustus_masked-tulip_contig_146_pilon_pilon-processed-gene-0.34-mRNA-1	1	GO:0016021
maker-tulip_contig_566_pilon_pilon-augustus-gene-0.4-mRNA-1	1	GO:0005515,GO:0006629
maker-tulip_contig_674_pilon_pilon-augustus-gene-0.15-mRNA-1	1
maker-tulip_contig_3_pilon_pilon-augustus-gene-0.12-mRNA-1	1	GO:0003677,GO:0003707,GO:0005634,GO:0006355
maker-tulip_contig_490_pilon_pilon-augustus-gene-2.39-mRNA-1	1
augustus_masked-tulip_contig_401_pilon_pilon-processed-gene-0.9-mRNA-1	1
maker-tulip_contig_784_pilon_pilon-augustus-gene-0.6-mRNA-1	1
maker-tulip_contig_381_pilon_pilon-augustus-gene-0.113-mRNA-1	1	GO:0016614,GO:0050660,GO:0055114,GO:0016614,GO:0055114
augustus_masked-tulip_contig_626_pilon_pilon-processed-gene-1.1-mRNA-1	1	GO:0004930,GO:0007186,GO:0016021,GO:0016021
augustus_masked-tulip_contig_211_pilon_pilon-processed-gene-1.9-mRNA-1	1	GO:0000015,GO:0000287,GO:0004634,GO:0006096,GO:0046872
augustus_masked-tulip_contig_697_pilon_pilon-processed-gene-2.16-mRNA-1	1
maker-tulip_contig_272_pilon_pilon-augustus-gene-5.55-mRNA-1	1	GO:0005515
maker-tulip_contig_320_pilon_pilon-augustus-gene-1.2-mRNA-1	1
maker-tulip_contig_211_pilon_pilon-augustus-gene-2.0-mRNA-1	1	GO:0005515
maker-tulip_contig_236_pilon_pilon-augustus-gene-1.8-mRNA-1	1	GO:0006751,GO:0036374
maker-tulip_contig_870_pilon_pilon-augustus-gene-0.1-mRNA-1	1	GO:0016020,GO:0030001,GO:0046873,GO:0055085
maker-tulip_contig_441_pilon_pilon-augustus-gene-4.20-mRNA-1	1	GO:0005524,GO:0016310,GO:0016772,GO:0005524,GO:0016301,GO:0016310
maker-tulip_contig_491_pilon_pilon-augustus-gene-0.25-mRNA-1	1	GO:0008442,GO:0051287,GO:0055114,GO:0055114,GO:0051287,GO:0050661,GO:0016491,GO:0055114
maker-tulip_contig_31_pilon_pilon-augustus-gene-0.9-mRNA-1	1
maker-tulip_contig_281_pilon_pilon-augustus-gene-5.11-mRNA-1	1	GO:0006099,GO:0016627,GO:0050660,GO:0055114,GO:0016627,GO:0022900,GO:0050660,GO:0055114,GO:0016491,GO:0055114
maker-tulip_contig_78_pilon_pilon-augustus-gene-0.99-mRNA-1	1	GO:0051560
maker-tulip_contig_818_pilon_pilon-augustus-gene-0.72-mRNA-1	1	GO:0005524,GO:0016887
maker-tulip_contig_416_pilon_pilon-augustus-gene-0.61-mRNA-1	1	GO:0016471,GO:0042626,GO:1902600
maker-tulip_contig_909_pilon_pilon-augustus-gene-0.42-mRNA-1	1	GO:0004148,GO:0050660,GO:0055114,GO:0045454,GO:0055114,GO:0016668,GO:0055114,GO:0016491,GO:0055114,GO:0016491,GO:0050660,GO:0055114,GO:0009055,GO:0016491
augustus_masked-tulip_contig_343_pilon_pilon-processed-gene-0.89-mRNA-1	1	GO:0004149,GO:0006099,GO:0045252,GO:0016746
maker-tulip_contig_320_pilon_pilon-augustus-gene-0.12-mRNA-1	1	GO:0016021
maker-tulip_contig_527_pilon_pilon-augustus-gene-1.31-mRNA-1	1	GO:0006812,GO:0015299,GO:0016021,GO:0055085
augustus_masked-tulip_contig_773_pilon_pilon-processed-gene-2.19-mRNA-1	1	GO:0005515
maker-tulip_contig_640_pilon_pilon-augustus-gene-1.24-mRNA-1	1	GO:0008146,GO:0016021,GO:0008146,GO:0016021,GO:0016051
maker-tulip_contig_907_pilon_pilon-augustus-gene-0.17-mRNA-1	1	GO:0005507,GO:0005758,GO:0006825,GO:0016531
maker-tulip_contig_289_pilon_pilon-augustus-gene-0.42-mRNA-1	1	GO:0016758
augustus_masked-tulip_contig_29_pilon_pilon-processed-gene-1.4-mRNA-1	1	GO:0022857
augustus_masked-tulip_contig_546_pilon_pilon-processed-gene-0.61-mRNA-1	1	GO:0071949
maker-tulip_contig_662_pilon_pilon-augustus-gene-2.43-mRNA-1	1	GO:0005549
maker-tulip_contig_2_pilon_pilon-augustus-gene-1.0-mRNA-1	1
maker-tulip_contig_236_pilon_pilon-augustus-gene-4.104-mRNA-1	1
maker-tulip_contig_126_pilon_pilon-augustus-gene-2.28-mRNA-1	1	GO:0016491,GO:0016491,GO:0055114
maker-tulip_contig_196_pilon_pilon-augustus-gene-4.42-mRNA-1	1	GO:0003700,GO:0006355
maker-tulip_contig_907_pilon_pilon-augustus-gene-3.23-mRNA-1	1	GO:0008190,GO:0045947
maker-tulip_contig_44_pilon_pilon-augustus-gene-7.46-mRNA-1	1	GO:0006520,GO:0016491,GO:0055114,GO:0016639
augustus_masked-tulip_contig_715_pilon_pilon-processed-gene-4.9-mRNA-1	1
maker-tulip_contig_828_pilon_pilon-augustus-gene-0.5-mRNA-1	1
augustus_masked-tulip_contig_455_pilon_pilon-processed-gene-0.19-mRNA-1	1
maker-tulip_contig_121_pilon_pilon-augustus-gene-0.27-mRNA-1	1
maker-tulip_contig_29_pilon_pilon-augustus-gene-1.34-mRNA-1	1
augustus_masked-tulip_contig_610_pilon_pilon-processed-gene-1.65-mRNA-1	1	GO:0006629,GO:0016788
maker-tulip_contig_852_pilon_pilon-augustus-gene-0.23-mRNA-1	1
augustus_masked-tulip_contig_767_pilon_pilon-processed-gene-0.12-mRNA-1	1	GO:0016020
maker-tulip_contig_86_pilon_pilon-augustus-gene-1.10-mRNA-1	1
maker-tulip_contig_333_pilon_pilon-augustus-gene-1.0-mRNA-1	1	GO:0008299
augustus_masked-tulip_contig_881_pilon_pilon-processed-gene-1.66-mRNA-1	1
augustus_masked-tulip_contig_343_pilon_pilon-processed-gene-0.82-mRNA-1	1
maker-tulip_contig_157_pilon_pilon-augustus-gene-0.24-mRNA-1	1	GO:0003824
maker-tulip_contig_870_pilon_pilon-augustus-gene-4.31-mRNA-1	1
maker-tulip_contig_236_pilon_pilon-augustus-gene-7.58-mRNA-1	1
maker-tulip_contig_800_pilon_pilon-augustus-gene-1.67-mRNA-1	1
maker-tulip_contig_677_pilon_pilon-augustus-gene-0.22-mRNA-1	1	GO:0006629
maker-tulip_contig_651_pilon_pilon-augustus-gene-0.27-mRNA-1	1	GO:0004672,GO:0005524,GO:0006468,GO:0005524,GO:0004714,GO:0005524,GO:0006468,GO:0007169,GO:0004672,GO:0006468
maker-tulip_contig_130_pilon_pilon-augustus-gene-0.7-mRNA-1	1	GO:0016020,GO:0022857,GO:0055085
maker-tulip_contig_168_pilon_pilon-augustus-gene-0.76-mRNA-1	1	GO:0005524,GO:0016301,GO:0019206
maker-tulip_contig_54_pilon_pilon-augustus-gene-1.11-mRNA-1	1	GO:0008654,GO:0016020,GO:0016780
maker-tulip_contig_916_pilon_pilon-augustus-gene-0.4-mRNA-1	1	GO:0015991,GO:0033180,GO:0046961,GO:0034220
maker-tulip_contig_324_pilon_pilon-augustus-gene-0.9-mRNA-1	1	GO:0042626
maker-tulip_contig_482_pilon_pilon-augustus-gene-1.30-mRNA-1	1	GO:0003676
maker-tulip_contig_327_pilon_pilon-augustus-gene-6.6-mRNA-1	1
augustus_masked-tulip_contig_843_pilon_pilon-processed-gene-3.2-mRNA-1	1
maker-tulip_contig_338_pilon_pilon-augustus-gene-0.39-mRNA-1	1	GO:0016020,GO:0022857,GO:0055085
maker-tulip_contig_605_pilon_pilon-augustus-gene-0.45-mRNA-1	1	GO:0000062
maker-tulip_contig_473_pilon_pilon-augustus-gene-1.32-mRNA-1	1	GO:0016021
augustus_masked-tulip_contig_254_pilon_pilon-processed-gene-0.36-mRNA-1	1
augustus_masked-tulip_contig_45_pilon_pilon-processed-gene-0.3-mRNA-1	1	GO:0003824,GO:0016491,GO:0055114,GO:0016491,GO:0016620,GO:0055114,GO:0009058,GO:0016742
augustus_masked-tulip_contig_505_pilon_pilon-processed-gene-2.3-mRNA-1	1	GO:0003824
maker-tulip_contig_279_pilon_pilon-augustus-gene-0.7-mRNA-1	1	GO:0008299
maker-tulip_contig_290_pilon_pilon-augustus-gene-5.5-mRNA-1	1
maker-tulip_contig_464_pilon_pilon-augustus-gene-0.11-mRNA-1	1
maker-tulip_contig_623_pilon_pilon-augustus-gene-5.112-mRNA-1	1	GO:0003924,GO:0005525,GO:0005525
maker-tulip_contig_515_pilon_pilon-augustus-gene-5.1-mRNA-1	1	GO:0005524,GO:0016021,GO:0005524,GO:0016021,GO:0042626,GO:0055085
augustus_masked-tulip_contig_745_pilon_pilon-processed-gene-1.4-mRNA-1	1
maker-tulip_contig_46_pilon_pilon-augustus-gene-2.19-mRNA-1	1	GO:0003677,GO:0005634,GO:0006355,GO:0003677,GO:0006355
maker-tulip_contig_429_pilon_pilon-augustus-gene-2.9-mRNA-1	1	GO:0005524,GO:0016021,GO:0005524,GO:0016887,GO:0005524,GO:0016021,GO:0042626,GO:0055085
maker-tulip_contig_54_pilon_pilon-augustus-gene-0.18-mRNA-1	1	GO:0005509
maker-tulip_contig_586_pilon_pilon-augustus-gene-5.38-mRNA-1	1	GO:0003824,GO:0016791
maker-tulip_contig_109_pilon_pilon-augustus-gene-1.2-mRNA-1	1	GO:0004435,GO:0006629,GO:0007165,GO:0035556,GO:0035556,GO:0006629,GO:0008081
maker-tulip_contig_216_pilon_pilon-augustus-gene-0.45-mRNA-1	1	GO:0004930,GO:0007186,GO:0016021,GO:0016021
maker-tulip_contig_611_pilon_pilon-augustus-gene-2.2-mRNA-1	1
augustus_masked-tulip_contig_77_pilon_pilon-processed-gene-1.5-mRNA-1	1	GO:0016021,GO:0055085
augustus_masked-tulip_contig_271_pilon_pilon-processed-gene-0.12-mRNA-1	1	GO:0004930,GO:0007186,GO:0016021,GO:0016021
augustus_masked-tulip_contig_248_pilon_pilon-processed-gene-0.6-mRNA-1	1	GO:0004491,GO:0055114,GO:0016491,GO:0055114,GO:0016491,GO:0016620,GO:0055114
maker-tulip_contig_192_pilon_pilon-augustus-gene-0.4-mRNA-1	1	GO:0016491,GO:0055114
augustus_masked-tulip_contig_82_pilon_pilon-processed-gene-1.15-mRNA-1	1	GO:0016491
augustus_masked-tulip_contig_495_pilon_pilon-processed-gene-0.11-mRNA-1	1
maker-tulip_contig_531_pilon_pilon-augustus-gene-6.3-mRNA-1	1	GO:0016491
maker-tulip_contig_668_pilon_pilon-augustus-gene-1.16-mRNA-1	1
augustus_masked-tulip_contig_584_pilon_pilon-processed-gene-3.89-mRNA-1	1	GO:0005215,GO:0016020,GO:0055085,GO:0005515
maker-tulip_contig_821_pilon_pilon-augustus-gene-0.10-mRNA-1	1	GO:0008271,GO:0008272,GO:0016020,GO:0055085,GO:0008272,GO:0015116,GO:0016021
maker-tulip_contig_881_pilon_pilon-augustus-gene-1.47-mRNA-1	1	GO:0004672,GO:0005524,GO:0006468,GO:0004713,GO:0006468,GO:0004672,GO:0006468
maker-tulip_contig_872_pilon_pilon-augustus-gene-0.80-mRNA-1	1
maker-tulip_contig_819_pilon_pilon-augustus-gene-0.38-mRNA-1	1	GO:0016021
maker-tulip_contig_394_pilon_pilon-augustus-gene-2.9-mRNA-1	1
maker-tulip_contig_586_pilon_pilon-augustus-gene-4.56-mRNA-1	1
maker-tulip_contig_711_pilon_pilon-augustus-gene-1.26-mRNA-1	1	GO:0003824,GO:0009058
augustus_masked-tulip_contig_560_pilon_pilon-processed-gene-3.4-mRNA-1	1	GO:0003924,GO:0005525,GO:0005525,GO:0007165,GO:0016020
maker-tulip_contig_885_pilon_pilon-augustus-gene-0.10-mRNA-1	1	GO:0004888,GO:0005216,GO:0016021,GO:0034220,GO:0006811,GO:0016021
augustus_masked-tulip_contig_732_pilon_pilon-processed-gene-4.6-mRNA-1	1
augustus_masked-tulip_contig_732_pilon_pilon-processed-gene-4.5-mRNA-1	1	GO:0003700,GO:0006355,GO:0043565
augustus_masked-tulip_contig_274_pilon_pilon-processed-gene-2.1-mRNA-1	1	GO:0016021,GO:0055085
maker-tulip_contig_39_pilon_pilon-augustus-gene-1.212-mRNA-1	1	GO:0005975,GO:0016773
maker-tulip_contig_361_pilon_pilon-augustus-gene-1.77-mRNA-1	1	GO:0005249,GO:0006813,GO:0008076
maker-tulip_contig_515_pilon_pilon-augustus-gene-3.28-mRNA-1	1	GO:0003924,GO:0005525,GO:0005525,GO:0007165,GO:0016020
maker-tulip_contig_199_pilon_pilon-augustus-gene-3.43-mRNA-1	1
maker-tulip_contig_199_pilon_pilon-augustus-gene-3.42-mRNA-1	1
maker-tulip_contig_72_pilon_pilon-augustus-gene-0.51-mRNA-1	1	GO:0005741,GO:0008320,GO:0030150,GO:0005741,GO:0055085
augustus_masked-tulip_contig_294_pilon_pilon-processed-gene-1.14-mRNA-1	1	GO:0004930,GO:0007186,GO:0016021,GO:0016021,GO:0007186,GO:0007631,GO:0016021,GO:0016499
maker-tulip_contig_190_pilon_pilon-augustus-gene-2.26-mRNA-1	1	GO:0052689
maker-tulip_contig_441_pilon_pilon-augustus-gene-2.5-mRNA-1	1	GO:0005515
maker-tulip_contig_827_pilon_pilon-augustus-gene-2.104-mRNA-1	1	GO:0005509,GO:0007156,GO:0016020,GO:0005886,GO:0007155,GO:0005509,GO:0016020
augustus_masked-tulip_contig_34_pilon_pilon-processed-gene-0.14-mRNA-1	1	GO:0004252,GO:0006508
maker-tulip_contig_597_pilon_pilon-augustus-gene-4.35-mRNA-1	1
maker-tulip_contig_406_pilon_pilon-augustus-gene-0.44-mRNA-1	1	GO:0004930,GO:0007186,GO:0016021,GO:0016021
maker-tulip_contig_689_pilon_pilon-augustus-gene-3.11-mRNA-1	1
maker-tulip_contig_584_pilon_pilon-augustus-gene-3.34-mRNA-1	1	GO:0005215,GO:0016020,GO:0055085,GO:0005515
maker-tulip_contig_429_pilon_pilon-augustus-gene-0.32-mRNA-1	1	GO:0016021,GO:0022857,GO:0055085
maker-tulip_contig_420_pilon_pilon-augustus-gene-2.73-mRNA-1	1	GO:0001664,GO:0005184,GO:0031395
maker-tulip_contig_189_pilon_pilon-augustus-gene-0.52-mRNA-1	1	GO:0004553,GO:0005975
augustus_masked-tulip_contig_673_pilon_pilon-processed-gene-0.34-mRNA-1	1	GO:0016021,GO:0055085
augustus_masked-tulip_contig_3_pilon_pilon-processed-gene-0.54-mRNA-1	1
augustus_masked-tulip_contig_495_pilon_pilon-processed-gene-0.8-mRNA-1	1
maker-tulip_contig_800_pilon_pilon-augustus-gene-1.42-mRNA-1	1	GO:0016491
maker-tulip_contig_473_pilon_pilon-augustus-gene-1.35-mRNA-1	1	GO:0016021
maker-tulip_contig_58_pilon_pilon-augustus-gene-4.47-mRNA-1	1	GO:0004348,GO:0006665
maker-tulip_contig_704_pilon_pilon-augustus-gene-2.62-mRNA-1	1
maker-tulip_contig_362_pilon_pilon-augustus-gene-1.39-mRNA-1	1	GO:0006506,GO:0016787
augustus_masked-tulip_contig_37_pilon_pilon-processed-gene-1.20-mRNA-1	1
maker-tulip_contig_507_pilon_pilon-augustus-gene-2.72-mRNA-1	1	GO:0008146,GO:0016021,GO:0008146,GO:0016021,GO:0016051
augustus_masked-tulip_contig_689_pilon_pilon-processed-gene-4.10-mRNA-1	1
augustus_masked-tulip_contig_450_pilon_pilon-processed-gene-1.19-mRNA-1	1
maker-tulip_contig_211_pilon_pilon-augustus-gene-4.45-mRNA-1	1	GO:0005509,GO:0007156,GO:0016020,GO:0005886,GO:0007155,GO:0005509,GO:0016020
maker-tulip_contig_626_pilon_pilon-augustus-gene-1.54-mRNA-1	1	GO:0004252,GO:0006508
maker-tulip_contig_334_pilon_pilon-augustus-gene-2.2-mRNA-1	1
maker-tulip_contig_1_pilon_pilon-augustus-gene-4.8-mRNA-1	1	GO:0004553,GO:0005975
maker-tulip_contig_441_pilon_pilon-augustus-gene-6.8-mRNA-1	1
maker-tulip_contig_236_pilon_pilon-augustus-gene-3.12-mRNA-1	1
maker-tulip_contig_640_pilon_pilon-augustus-gene-2.18-mRNA-1	1
augustus_masked-tulip_contig_638_pilon_pilon-processed-gene-0.37-mRNA-1	1	GO:0005506,GO:0016705,GO:0020037,GO:0055114,GO:0016705,GO:0055114
augustus_masked-tulip_contig_221_pilon_pilon-processed-gene-0.5-mRNA-1	1	GO:0004601,GO:0006979,GO:0020037,GO:0055114
maker-tulip_contig_769_pilon_pilon-augustus-gene-0.6-mRNA-1	1	GO:0005515
maker-tulip_contig_872_pilon_pilon-augustus-gene-0.150-mRNA-1	1
maker-tulip_contig_199_pilon_pilon-augustus-gene-4.29-mRNA-1	1
maker-tulip_contig_327_pilon_pilon-augustus-gene-0.13-mRNA-1	1	GO:0004930,GO:0007186,GO:0016021,GO:0016021,GO:0004983,GO:0007186,GO:0016021
maker-tulip_contig_34_pilon_pilon-augustus-gene-0.125-mRNA-1	1	GO:0004252,GO:0006508
maker-tulip_contig_82_pilon_pilon-augustus-gene-1.34-mRNA-1	1	GO:0005215,GO:0016021,GO:0055085,GO:0016021,GO:0022857,GO:0055085
maker-tulip_contig_121_pilon_pilon-augustus-gene-1.12-mRNA-1	1
maker-tulip_contig_605_pilon_pilon-augustus-gene-0.33-mRNA-1	1	GO:0016758
maker-tulip_contig_182_pilon_pilon-augustus-gene-1.63-mRNA-1	1	GO:0005179,GO:0005179,GO:0005576
maker-tulip_contig_307_pilon_pilon-augustus-gene-1.148-mRNA-1	1	GO:0004161,GO:0004337,GO:0033384,GO:0045337,GO:0008299
maker-tulip_contig_740_pilon_pilon-augustus-gene-0.17-mRNA-1	1	GO:0016758
maker-tulip_contig_872_pilon_pilon-augustus-gene-0.84-mRNA-1	1
augustus_masked-tulip_contig_566_pilon_pilon-processed-gene-2.43-mRNA-1	1	GO:0003676
maker-tulip_contig_662_pilon_pilon-augustus-gene-2.44-mRNA-1	1	GO:0005549
maker-tulip_contig_123_pilon_pilon-augustus-gene-0.7-mRNA-1	1	GO:0006508,GO:0008237,GO:0016787
maker-tulip_contig_123_pilon_pilon-augustus-gene-0.8-mRNA-1	1	GO:0016787
augustus_masked-tulip_contig_121_pilon_pilon-processed-gene-3.36-mRNA-1	1	GO:0042302
augustus_masked-tulip_contig_576_pilon_pilon-processed-gene-0.16-mRNA-1	1
maker-tulip_contig_623_pilon_pilon-augustus-gene-4.41-mRNA-1	1
maker-tulip_contig_662_pilon_pilon-augustus-gene-2.36-mRNA-1	1	GO:0005549
maker-tulip_contig_584_pilon_pilon-augustus-gene-1.11-mRNA-1	1
augustus_masked-tulip_contig_645_pilon_pilon-processed-gene-2.35-mRNA-1	1	GO:0004930,GO:0007186,GO:0016021,GO:0016021,GO:0005887,GO:0007186,GO:0016907
maker-tulip_contig_187_pilon_pilon-augustus-gene-1.35-mRNA-1	1
augustus_masked-tulip_contig_483_pilon_pilon-processed-gene-0.14-mRNA-1	1
augustus_masked-tulip_contig_506_pilon_pilon-processed-gene-1.8-mRNA-1	1	GO:0005515
maker-tulip_contig_47_pilon_pilon-augustus-gene-0.24-mRNA-1	1	GO:0016614,GO:0050660,GO:0055114,GO:0016614,GO:0055114
maker-tulip_contig_619_pilon_pilon-augustus-gene-1.4-mRNA-1	1	GO:0005219,GO:0006874,GO:0016021,GO:0006816
maker-tulip_contig_407_pilon_pilon-augustus-gene-7.95-mRNA-1	1	GO:0006979,GO:0016671,GO:0030091,GO:0033743,GO:0055114
maker-tulip_contig_450_pilon_pilon-augustus-gene-0.11-mRNA-1	1
maker-tulip_contig_781_pilon_pilon-augustus-gene-4.9-mRNA-1	1
maker-tulip_contig_334_pilon_pilon-augustus-gene-2.34-mRNA-1	1
maker-tulip_contig_251_pilon_pilon-augustus-gene-0.0-mRNA-1	1	GO:0005215,GO:0016021,GO:0055085,GO:0016021,GO:0022857,GO:0055085
augustus_masked-tulip_contig_690_pilon_pilon-processed-gene-5.16-mRNA-1	1
augustus_masked-tulip_contig_307_pilon_pilon-processed-gene-0.35-mRNA-1	1
maker-tulip_contig_216_pilon_pilon-augustus-gene-0.47-mRNA-1	1	GO:0004930,GO:0007186,GO:0016021,GO:0016021
maker-tulip_contig_18_pilon_pilon-augustus-gene-0.12-mRNA-1	1
maker-tulip_contig_584_pilon_pilon-augustus-gene-0.12-mRNA-1	1	GO:0003676
maker-tulip_contig_715_pilon_pilon-augustus-gene-4.38-mRNA-1	1	GO:0007165
maker-tulip_contig_168_pilon_pilon-augustus-gene-0.35-mRNA-1	1	GO:0032542,GO:0055114
maker-tulip_contig_280_pilon_pilon-augustus-gene-1.90-mRNA-1	1	GO:0016012,GO:0016021
maker-tulip_contig_674_pilon_pilon-augustus-gene-1.48-mRNA-1	1	GO:0007155,GO:0051015,GO:0007266
augustus_masked-tulip_contig_809_pilon_pilon-processed-gene-2.0-mRNA-1	1
maker-tulip_contig_476_pilon_pilon-augustus-gene-0.2-mRNA-1	1	GO:0033961
maker-tulip_contig_529_pilon_pilon-augustus-gene-1.10-mRNA-1	1
augustus_masked-tulip_contig_566_pilon_pilon-processed-gene-2.32-mRNA-1	1
maker-tulip_contig_407_pilon_pilon-augustus-gene-8.49-mRNA-1	1
maker-tulip_contig_514_pilon_pilon-augustus-gene-0.16-mRNA-1	1	GO:0080019
maker-tulip_contig_441_pilon_pilon-augustus-gene-2.4-mRNA-1	1	GO:0005515
maker-tulip_contig_693_pilon_pilon-augustus-gene-2.43-mRNA-1	1
maker-tulip_contig_714_pilon_pilon-augustus-gene-0.72-mRNA-1	1	GO:0003676,GO:0003677
maker-tulip_contig_31_pilon_pilon-augustus-gene-1.70-mRNA-1	1
maker-tulip_contig_196_pilon_pilon-augustus-gene-0.7-mRNA-1	1	GO:0016021,GO:0055085
augustus_masked-tulip_contig_474_pilon_pilon-processed-gene-6.64-mRNA-1	1	GO:0003824,GO:0009116,GO:0004850,GO:0005737,GO:0009166
maker-tulip_contig_689_pilon_pilon-augustus-gene-1.32-mRNA-1	1	GO:0003723
maker-tulip_contig_571_pilon_pilon-augustus-gene-0.20-mRNA-1	1
maker-tulip_contig_204_pilon_pilon-augustus-gene-1.18-mRNA-1	1	GO:0004252,GO:0006508
maker-tulip_contig_217_pilon_pilon-augustus-gene-4.3-mRNA-1	1
maker-tulip_contig_690_pilon_pilon-augustus-gene-4.25-mRNA-1	1
maker-tulip_contig_54_pilon_pilon-augustus-gene-2.39-mRNA-1	1	GO:0005216,GO:0006811,GO:0016020,GO:0055085,GO:0005515,GO:0005262,GO:0016020,GO:0070588
maker-tulip_contig_715_pilon_pilon-augustus-gene-3.12-mRNA-1	1	GO:0001540,GO:0005515
augustus_masked-tulip_contig_689_pilon_pilon-processed-gene-3.1-mRNA-1	1	GO:0003676,GO:0006355,GO:0030097,GO:0051569
maker-tulip_contig_689_pilon_pilon-augustus-gene-0.12-mRNA-1	1	GO:0003676
maker-tulip_contig_581_pilon_pilon-augustus-gene-4.20-mRNA-1	1
augustus_masked-tulip_contig_659_pilon_pilon-processed-gene-0.3-mRNA-1	1
augustus_masked-tulip_contig_77_pilon_pilon-processed-gene-1.3-mRNA-1	1
maker-tulip_contig_270_pilon_pilon-augustus-gene-3.86-mRNA-1	1
maker-tulip_contig_368_pilon_pilon-augustus-gene-0.60-mRNA-1	1	GO:0004888,GO:0005216,GO:0016021,GO:0034220,GO:0006811,GO:0016021
augustus_masked-tulip_contig_818_pilon_pilon-processed-gene-0.6-mRNA-1	1
maker-tulip_contig_476_pilon_pilon-augustus-gene-0.20-mRNA-1	1
augustus_masked-tulip_contig_345_pilon_pilon-processed-gene-4.14-mRNA-1	1	GO:0005524,GO:0016887,GO:0016020
augustus_masked-tulip_contig_434_pilon_pilon-processed-gene-0.36-mRNA-1	1
maker-tulip_contig_625_pilon_pilon-augustus-gene-0.30-mRNA-1	1	GO:0005215,GO:0016021,GO:0055085,GO:0016021,GO:0022857,GO:0055085
augustus_masked-tulip_contig_270_pilon_pilon-processed-gene-3.203-mRNA-1	1
maker-tulip_contig_597_pilon_pilon-augustus-gene-3.37-mRNA-1	1
maker-tulip_contig_1_pilon_pilon-augustus-gene-5.22-mRNA-1	1	GO:0004553,GO:0005975
maker-tulip_contig_327_pilon_pilon-augustus-gene-7.42-mRNA-1	1
maker-tulip_contig_212_pilon_pilon-augustus-gene-1.90-mRNA-1	1
maker-tulip_contig_1_pilon_pilon-augustus-gene-1.25-mRNA-1	1
maker-tulip_contig_651_pilon_pilon-augustus-gene-0.49-mRNA-1	1	GO:0003676,GO:0016787,GO:0046872
augustus_masked-tulip_contig_272_pilon_pilon-processed-gene-4.84-mRNA-1	1
maker-tulip_contig_812_pilon_pilon-augustus-gene-1.15-mRNA-1	1	GO:0016021,GO:0055085
maker-tulip_contig_59_pilon_pilon-augustus-gene-1.97-mRNA-1	1	GO:0003824,GO:0016772,GO:0016301,GO:0016772,GO:0005515
augustus_masked-tulip_contig_787_pilon_pilon-processed-gene-0.4-mRNA-1	1
maker-tulip_contig_307_pilon_pilon-augustus-gene-0.0-mRNA-1	1	GO:0005549
maker-tulip_contig_220_pilon_pilon-augustus-gene-0.22-mRNA-1	1	GO:0005549
augustus_masked-tulip_contig_495_pilon_pilon-processed-gene-0.7-mRNA-1	1
augustus_masked-tulip_contig_334_pilon_pilon-processed-gene-2.66-mRNA-1	1	GO:0005432,GO:0006816,GO:0016020,GO:0016021,GO:0055085
augustus_masked-tulip_contig_245_pilon_pilon-processed-gene-0.1-mRNA-1	1
augustus_masked-tulip_contig_15_pilon_pilon-processed-gene-0.13-mRNA-1	1
augustus_masked-tulip_contig_234_pilon_pilon-processed-gene-0.30-mRNA-1	1
maker-tulip_contig_581_pilon_pilon-augustus-gene-2.24-mRNA-1	1	GO:0004222,GO:0006508,GO:0008237,GO:0006508
maker-tulip_contig_145_pilon_pilon-augustus-gene-6.10-mRNA-1	1
augustus_masked-tulip_contig_168_pilon_pilon-processed-gene-0.102-mRNA-1	1
augustus_masked-tulip_contig_72_pilon_pilon-processed-gene-0.18-mRNA-1	1	GO:0005216,GO:0006811,GO:0016020,GO:0055085,GO:0005245,GO:0005891,GO:0070588
maker-tulip_contig_99_pilon_pilon-augustus-gene-0.12-mRNA-1	1
augustus_masked-tulip_contig_539_pilon_pilon-processed-gene-0.1-mRNA-1	1	GO:0003676,GO:0008270
maker-tulip_contig_61_pilon_pilon-augustus-gene-0.16-mRNA-1	1	GO:0005509
maker-tulip_contig_620_pilon_pilon-augustus-gene-1.17-mRNA-1	1	GO:0004114,GO:0007165,GO:0008081,GO:0005515
maker-tulip_contig_690_pilon_pilon-augustus-gene-3.40-mRNA-1	1	GO:0003824
maker-tulip_contig_515_pilon_pilon-augustus-gene-2.15-mRNA-1	1	GO:0006281,GO:0051382,GO:0046982
maker-tulip_contig_54_pilon_pilon-augustus-gene-0.15-mRNA-1	1	GO:0005509,GO:0005515
maker-tulip_contig_307_pilon_pilon-augustus-gene-1.100-mRNA-1	1	GO:0003824,GO:0016747
augustus_masked-tulip_contig_616_pilon_pilon-processed-gene-1.11-mRNA-1	1	GO:0004930,GO:0007186,GO:0016021,GO:0016021
maker-tulip_contig_287_pilon_pilon-augustus-gene-1.129-mRNA-1	1	GO:0004252,GO:0006508
maker-tulip_contig_283_pilon_pilon-augustus-gene-2.16-mRNA-1	1	GO:0005272,GO:0006814,GO:0016020
maker-tulip_contig_503_pilon_pilon-augustus-gene-1.5-mRNA-1	1	GO:0016021
maker-tulip_contig_498_pilon_pilon-augustus-gene-0.1-mRNA-1	1
maker-tulip_contig_831_pilon_pilon-augustus-gene-0.49-mRNA-1	1	GO:0016020
augustus_masked-tulip_contig_391_pilon_pilon-processed-gene-0.1-mRNA-1	1
maker-tulip_contig_70_pilon_pilon-augustus-gene-0.48-mRNA-1	1	GO:0004930,GO:0007186,GO:0016021,GO:0016021
maker-tulip_contig_691_pilon_pilon-augustus-gene-4.32-mRNA-1	1	GO:0005549
maker-tulip_contig_362_pilon_pilon-augustus-gene-0.26-mRNA-1	1	GO:0004252,GO:0006508
maker-tulip_contig_571_pilon_pilon-augustus-gene-0.24-mRNA-1	1
maker-tulip_contig_691_pilon_pilon-augustus-gene-1.13-mRNA-1	1	GO:0004930,GO:0007186,GO:0016021,GO:0016021,GO:0007186,GO:0008502,GO:0016021
maker-tulip_contig_103_pilon_pilon-augustus-gene-0.23-mRNA-1	1	GO:0005216,GO:0006811,GO:0016020,GO:0055085,GO:0005515,GO:0005216,GO:0016021,GO:0034220
augustus_masked-tulip_contig_495_pilon_pilon-processed-gene-0.20-mRNA-1	1
augustus_masked-tulip_contig_583_pilon_pilon-processed-gene-1.36-mRNA-1	1
augustus_masked-tulip_contig_698_pilon_pilon-processed-gene-1.8-mRNA-1	1	GO:0008017,GO:0046600
augustus_masked-tulip_contig_76_pilon_pilon-processed-gene-1.22-mRNA-1	1	GO:0004672,GO:0005524,GO:0006468,GO:0004713,GO:0006468,GO:0004672,GO:0006468
augustus_masked-tulip_contig_632_pilon_pilon-processed-gene-3.17-mRNA-1	1	GO:0004497,GO:0005506,GO:0009072,GO:0055114,GO:0016714,GO:0055114
maker-tulip_contig_855_pilon_pilon-augustus-gene-2.13-mRNA-1	1
maker-tulip_contig_280_pilon_pilon-augustus-gene-1.74-mRNA-1	1
maker-tulip_contig_280_pilon_pilon-augustus-gene-1.75-mRNA-1	1	GO:0005328,GO:0005328,GO:0006836,GO:0016021
maker-tulip_contig_748_pilon_pilon-augustus-gene-1.26-mRNA-1	1	GO:0016021,GO:0055085
maker-tulip_contig_260_pilon_pilon-augustus-gene-0.30-mRNA-1	1	GO:0005515
maker-tulip_contig_199_pilon_pilon-augustus-gene-5.20-mRNA-1	1
maker-tulip_contig_247_pilon_pilon-augustus-gene-2.105-mRNA-1	1	GO:0005337,GO:0008504,GO:0016021,GO:0055085,GO:0005337,GO:0016021,GO:1901642
maker-tulip_contig_43_pilon_pilon-augustus-gene-6.43-mRNA-1	1	GO:0000166,GO:0016021,GO:0005391,GO:0005524,GO:0006813,GO:0006814,GO:0016021
augustus_masked-tulip_contig_691_pilon_pilon-processed-gene-2.20-mRNA-1	1	GO:0003824,GO:0055114,GO:0016715,GO:0055114,GO:0004497,GO:0005507,GO:0016715,GO:0055114
maker-tulip_contig_664_pilon_pilon-augustus-gene-0.9-mRNA-1	1	GO:0005216,GO:0006811,GO:0016020,GO:0055085,GO:0005249,GO:0006813,GO:0008076
augustus_masked-tulip_contig_208_pilon_pilon-processed-gene-1.39-mRNA-1	1	GO:0007186,GO:0035556
maker-tulip_contig_620_pilon_pilon-augustus-gene-3.2-mRNA-1	1	GO:0004930,GO:0007186,GO:0016021,GO:0016021,GO:0004983,GO:0007186,GO:0016021
augustus_masked-tulip_contig_407_pilon_pilon-processed-gene-3.60-mRNA-1	1	GO:0016021
augustus_masked-tulip_contig_698_pilon_pilon-processed-gene-0.4-mRNA-1	1	GO:0005216,GO:0006811,GO:0016020,GO:0055085,GO:0051260,GO:0005515,GO:0005249,GO:0006813,GO:0008076
augustus_masked-tulip_contig_15_pilon_pilon-processed-gene-0.12-mRNA-1	1	GO:0005515
maker-tulip_contig_362_pilon_pilon-augustus-gene-9.3-mRNA-1	1
augustus_masked-tulip_contig_474_pilon_pilon-processed-gene-5.20-mRNA-1	1	GO:0048786
maker-tulip_contig_168_pilon_pilon-augustus-gene-0.22-mRNA-1	1
augustus_masked-tulip_contig_66_pilon_pilon-processed-gene-3.6-mRNA-1	1
augustus_masked-tulip_contig_450_pilon_pilon-processed-gene-1.10-mRNA-1	1
augustus_masked-tulip_contig_323_pilon_pilon-processed-gene-2.36-mRNA-1	1	GO:0005524,GO:0015721,GO:0016021,GO:0042626,GO:0005524,GO:0016887,GO:0005524,GO:0016021,GO:0042626,GO:0055085,GO:0005524,GO:0016021
augustus_masked-tulip_contig_196_pilon_pilon-processed-gene-1.21-mRNA-1	1
maker-tulip_contig_837_pilon_pilon-augustus-gene-9.46-mRNA-1	1
augustus_masked-tulip_contig_280_pilon_pilon-processed-gene-1.13-mRNA-1	1	GO:0005215,GO:0016021,GO:0055085,GO:0016021,GO:0022857,GO:0055085
augustus_masked-tulip_contig_35_pilon_pilon-processed-gene-0.158-mRNA-1	1	GO:0003842,GO:0010133,GO:0016491,GO:0055114,GO:0016491,GO:0016620,GO:0055114
maker-tulip_contig_21_pilon_pilon-augustus-gene-0.13-mRNA-1	1	GO:0004657,GO:0006562
augustus_masked-tulip_contig_468_pilon_pilon-processed-gene-0.3-mRNA-1	1	GO:0004930,GO:0007186,GO:0016021,GO:0016021,GO:0008528
maker-tulip_contig_604_pilon_pilon-augustus-gene-3.62-mRNA-1	1	GO:0004252,GO:0006508
maker-tulip_contig_515_pilon_pilon-augustus-gene-6.8-mRNA-1	1
maker-tulip_contig_4_pilon_pilon-augustus-gene-1.7-mRNA-1	1	GO:0005874,GO:0019799,GO:0071929,GO:0019799
augustus_masked-tulip_contig_318_pilon_pilon-processed-gene-0.72-mRNA-1	1	GO:0003924,GO:0005525,GO:0005525,GO:0003924,GO:0072583
maker-tulip_contig_351_pilon_pilon-augustus-gene-1.68-mRNA-1	1
augustus_masked-tulip_contig_671_pilon_pilon-processed-gene-0.35-mRNA-1	1	GO:0005515
maker-tulip_contig_597_pilon_pilon-augustus-gene-5.0-mRNA-1	1	GO:0005216,GO:0006811,GO:0016020,GO:0055085,GO:0005891,GO:0008332,GO:0070509,GO:0005245,GO:0005891,GO:0070588
maker-tulip_contig_147_pilon_pilon-augustus-gene-1.58-mRNA-1	1	GO:0016021,GO:0055085
maker-tulip_contig_508_pilon_pilon-augustus-gene-1.33-mRNA-1	1	GO:0004672,GO:0005524,GO:0006468,GO:0005524,GO:0004674,GO:0005524,GO:0006468,GO:0004672,GO:0006468
maker-tulip_contig_807_pilon_pilon-augustus-gene-3.31-mRNA-1	1	GO:0003824,GO:0009116,GO:0004850,GO:0005737,GO:0009166
maker-tulip_contig_609_pilon_pilon-augustus-gene-0.20-mRNA-1	1	GO:0045216
maker-tulip_contig_72_pilon_pilon-augustus-gene-0.54-mRNA-1	1	GO:0005216,GO:0006811,GO:0016020,GO:0055085,GO:0005245,GO:0005891,GO:0070588
augustus_masked-tulip_contig_597_pilon_pilon-processed-gene-5.47-mRNA-1	1	GO:0005216,GO:0006811,GO:0016020,GO:0055085
augustus_masked-tulip_contig_15_pilon_pilon-processed-gene-2.9-mRNA-1	1	GO:0005524,GO:0016887,GO:0035494
augustus_masked-tulip_contig_15_pilon_pilon-processed-gene-2.8-mRNA-1	1
augustus_masked-tulip_contig_424_pilon_pilon-processed-gene-2.125-mRNA-1	1
augustus_masked-tulip_contig_147_pilon_pilon-processed-gene-1.79-mRNA-1	1
maker-tulip_contig_238_pilon_pilon-augustus-gene-0.53-mRNA-1	1	GO:0016020
augustus_masked-tulip_contig_4_pilon_pilon-processed-gene-0.26-mRNA-1	1	GO:0006508,GO:0016805
maker-tulip_contig_597_pilon_pilon-augustus-gene-3.30-mRNA-1	1	GO:0008146
augustus_masked-tulip_contig_715_pilon_pilon-processed-gene-5.18-mRNA-1	1	GO:0005515
maker-tulip_contig_860_pilon_pilon-augustus-gene-6.2-mRNA-1	1
maker-tulip_contig_320_pilon_pilon-augustus-gene-1.6-mRNA-1	1
maker-tulip_contig_20_pilon_pilon-augustus-gene-0.25-mRNA-1	1
augustus_masked-tulip_contig_110_pilon_pilon-processed-gene-3.9-mRNA-1	1
maker-tulip_contig_407_pilon_pilon-augustus-gene-9.157-mRNA-1	1
maker-tulip_contig_831_pilon_pilon-augustus-gene-1.1-mRNA-1	1
maker-tulip_contig_628_pilon_pilon-augustus-gene-4.64-mRNA-1	1
maker-tulip_contig_493_pilon_pilon-augustus-gene-1.15-mRNA-1	1
maker-tulip_contig_837_pilon_pilon-augustus-gene-9.40-mRNA-1	1
maker-tulip_contig_59_pilon_pilon-augustus-gene-1.96-mRNA-1	1	GO:0005515
maker-tulip_contig_178_pilon_pilon-augustus-gene-0.52-mRNA-1	1
augustus_masked-tulip_contig_22_pilon_pilon-processed-gene-0.28-mRNA-1	1	GO:0015889,GO:0031419
maker-tulip_contig_490_pilon_pilon-augustus-gene-1.25-mRNA-1	1
augustus_masked-tulip_contig_327_pilon_pilon-processed-gene-10.7-mRNA-1	1	GO:0004930,GO:0007186,GO:0016021,GO:0016021
augustus_masked-tulip_contig_85_pilon_pilon-processed-gene-2.44-mRNA-1	1
maker-tulip_contig_507_pilon_pilon-augustus-gene-0.41-mRNA-1	1	GO:0004930,GO:0007186,GO:0016021
maker-tulip_contig_362_pilon_pilon-augustus-gene-5.0-mRNA-1	1	GO:0004930,GO:0007186,GO:0016021,GO:0016021
maker-tulip_contig_33_pilon_pilon-augustus-gene-5.2-mRNA-1	1
maker-tulip_contig_482_pilon_pilon-augustus-gene-3.26-mRNA-1	1	GO:0016021,GO:0055085
augustus_masked-tulip_contig_821_pilon_pilon-processed-gene-0.22-mRNA-1	1	GO:0005524,GO:0016887,GO:0016021,GO:0042626,GO:0055085
maker-tulip_contig_806_pilon_pilon-augustus-gene-1.12-mRNA-1	1
maker-tulip_contig_740_pilon_pilon-augustus-gene-1.4-mRNA-1	1	GO:0016758
augustus_masked-tulip_contig_109_pilon_pilon-processed-gene-1.70-mRNA-1	1	GO:0003824
maker-tulip_contig_627_pilon_pilon-augustus-gene-0.29-mRNA-1	1	GO:0003676
augustus_masked-tulip_contig_187_pilon_pilon-processed-gene-2.1-mRNA-1	1	GO:0005245,GO:0005891,GO:0070588,GO:0005515
maker-tulip_contig_531_pilon_pilon-augustus-gene-0.54-mRNA-1	1	GO:0004190,GO:0006508
maker-tulip_contig_531_pilon_pilon-augustus-gene-3.25-mRNA-1	1
maker-tulip_contig_6_pilon_pilon-augustus-gene-0.6-mRNA-1	1	GO:0005509,GO:0005509,GO:0006851
maker-tulip_contig_837_pilon_pilon-augustus-gene-0.2-mRNA-1	1
augustus_masked-tulip_contig_281_pilon_pilon-processed-gene-3.51-mRNA-1	1
maker-tulip_contig_778_pilon_pilon-augustus-gene-0.26-mRNA-1	1
maker-tulip_contig_916_pilon_pilon-augustus-gene-0.0-mRNA-1	1
maker-tulip_contig_593_pilon_pilon-augustus-gene-0.7-mRNA-1	1
maker-tulip_contig_351_pilon_pilon-augustus-gene-1.46-mRNA-1	1	GO:0016021,GO:0038023
maker-tulip_contig_767_pilon_pilon-augustus-gene-0.32-mRNA-1	1	GO:0000221,GO:0015991,GO:0000221,GO:0015991,GO:0046961
augustus_masked-tulip_contig_274_pilon_pilon-processed-gene-0.6-mRNA-1	1	GO:0005515,GO:0007165
maker-tulip_contig_387_pilon_pilon-augustus-gene-1.94-mRNA-1	1	GO:0015991,GO:0033178,GO:0046961
maker-tulip_contig_448_pilon_pilon-augustus-gene-2.21-mRNA-1	1	GO:0005524,GO:0046034,GO:1902600
maker-tulip_contig_396_pilon_pilon-augustus-gene-0.33-mRNA-1	1	GO:0005524,GO:0046034,GO:1902600,GO:0046034
augustus_masked-tulip_contig_586_pilon_pilon-processed-gene-10.3-mRNA-1	1
maker-tulip_contig_690_pilon_pilon-augustus-gene-1.19-mRNA-1	1	GO:0005524,GO:0006139,GO:0019205
maker-tulip_contig_323_pilon_pilon-augustus-gene-1.1-mRNA-1	1	GO:0005089,GO:0035023
augustus_masked-tulip_contig_333_pilon_pilon-processed-gene-3.2-mRNA-1	1
maker-tulip_contig_76_pilon_pilon-augustus-gene-0.7-mRNA-1	1
augustus_masked-tulip_contig_323_pilon_pilon-processed-gene-1.37-mRNA-1	1
maker-tulip_contig_81_pilon_pilon-augustus-gene-2.16-mRNA-1	1
augustus_masked-tulip_contig_81_pilon_pilon-processed-gene-1.37-mRNA-1	1
maker-tulip_contig_137_pilon_pilon-augustus-gene-0.26-mRNA-1	1	GO:0006887,GO:0008021,GO:0016020,GO:0017137,GO:0016020
maker-tulip_contig_252_pilon_pilon-augustus-gene-0.25-mRNA-1	1	GO:0020037
augustus_masked-tulip_contig_843_pilon_pilon-processed-gene-1.3-mRNA-1	1	GO:0007165,GO:0008289
maker-tulip_contig_69_pilon_pilon-augustus-gene-1.0-mRNA-1	1	GO:0003700,GO:0006355,GO:0043565
augustus_masked-tulip_contig_247_pilon_pilon-processed-gene-2.174-mRNA-1	1	GO:0004252,GO:0006508
maker-tulip_contig_275_pilon_pilon-augustus-gene-0.13-mRNA-1	1
augustus_masked-tulip_contig_838_pilon_pilon-processed-gene-0.9-mRNA-1	1	GO:0016020,GO:0022857,GO:0055085,GO:0016021,GO:0022857,GO:0055085
maker-tulip_contig_4_pilon_pilon-augustus-gene-0.0-mRNA-1	1
maker-tulip_contig_338_pilon_pilon-augustus-gene-1.12-mRNA-1	1	GO:0004930,GO:0007186,GO:0016021,GO:0016021
augustus_masked-tulip_contig_362_pilon_pilon-processed-gene-9.6-mRNA-1	1
maker-tulip_contig_185_pilon_pilon-augustus-gene-0.16-mRNA-1	1	GO:0004672,GO:0005524,GO:0006468,GO:0005515,GO:0004674,GO:0004683
augustus_masked-tulip_contig_827_pilon_pilon-processed-gene-0.14-mRNA-1	1	GO:0005515
augustus_masked-tulip_contig_194_pilon_pilon-processed-gene-2.1-mRNA-1	1	GO:0004930,GO:0007186,GO:0016021,GO:0016021
maker-tulip_contig_860_pilon_pilon-augustus-gene-0.14-mRNA-1	1	GO:0003700,GO:0006355,GO:0043565
augustus_masked-tulip_contig_182_pilon_pilon-processed-gene-1.6-mRNA-1	1	GO:0003676,GO:0008270
maker-tulip_contig_128_pilon_pilon-augustus-gene-0.9-mRNA-1	1	GO:0004198,GO:0005622,GO:0006508
maker-tulip_contig_632_pilon_pilon-augustus-gene-3.20-mRNA-1	1
augustus_masked-tulip_contig_307_pilon_pilon-processed-gene-1.8-mRNA-1	1	GO:0005509,GO:0005515
maker-tulip_contig_523_pilon_pilon-augustus-gene-0.114-mRNA-1	1
augustus_masked-tulip_contig_716_pilon_pilon-processed-gene-1.14-mRNA-1	1	GO:0004984,GO:0005549,GO:0007608,GO:0016020
maker-tulip_contig_145_pilon_pilon-augustus-gene-5.37-mRNA-1	1	GO:0004181,GO:0006508,GO:0008270
augustus_masked-tulip_contig_691_pilon_pilon-processed-gene-0.59-mRNA-1	1
maker-tulip_contig_490_pilon_pilon-augustus-gene-1.27-mRNA-1	1
augustus_masked-tulip_contig_597_pilon_pilon-processed-gene-5.54-mRNA-1	1
maker-tulip_contig_362_pilon_pilon-augustus-gene-3.50-mRNA-1	1	GO:0004888,GO:0007166,GO:0016021,GO:0004930,GO:0007186,GO:0016021
maker-tulip_contig_732_pilon_pilon-augustus-gene-6.0-mRNA-1	1	GO:0005515
augustus_masked-tulip_contig_441_pilon_pilon-processed-gene-4.1-mRNA-1	1
maker-tulip_contig_463_pilon_pilon-augustus-gene-0.24-mRNA-1	1	GO:0005515
maker-tulip_contig_73_pilon_pilon-augustus-gene-0.116-mRNA-1	1
augustus_masked-tulip_contig_837_pilon_pilon-processed-gene-7.66-mRNA-1	1	GO:0003777,GO:0005524,GO:0007018,GO:0003777,GO:0007018,GO:0003777,GO:0005524,GO:0007018,GO:0008017
maker-tulip_contig_867_pilon_pilon-augustus-gene-0.14-mRNA-1	1
augustus_masked-tulip_contig_523_pilon_pilon-processed-gene-0.49-mRNA-1	1
augustus_masked-tulip_contig_523_pilon_pilon-processed-gene-0.43-mRNA-1	1
maker-tulip_contig_252_pilon_pilon-augustus-gene-1.9-mRNA-1	1	GO:0004591,GO:0006099,GO:0030976,GO:0055114,GO:0016624
maker-tulip_contig_702_pilon_pilon-augustus-gene-0.82-mRNA-1	1	GO:0016021,GO:0055085
augustus_masked-tulip_contig_777_pilon_pilon-processed-gene-0.25-mRNA-1	1	GO:0005515,GO:0035556
maker-tulip_contig_167_pilon_pilon-augustus-gene-0.56-mRNA-1	1	GO:0003676
augustus_masked-tulip_contig_290_pilon_pilon-processed-gene-3.51-mRNA-1	1	GO:0004383,GO:0006182,GO:0020037,GO:0009190,GO:0016849,GO:0035556
maker-tulip_contig_190_pilon_pilon-augustus-gene-0.22-mRNA-1	1	GO:0009166,GO:0016787
maker-tulip_contig_307_pilon_pilon-augustus-gene-1.176-mRNA-1	1
augustus_masked-tulip_contig_334_pilon_pilon-processed-gene-2.68-mRNA-1	1
augustus_masked-tulip_contig_495_pilon_pilon-processed-gene-0.9-mRNA-1	1
maker-tulip_contig_931_pilon_pilon-augustus-gene-1.47-mRNA-1	1
maker-tulip_contig_305_pilon_pilon-augustus-gene-0.4-mRNA-1	1	GO:0005506,GO:0016491,GO:0055114,GO:0071949,GO:0051537,GO:0050660,GO:0016491,GO:0055114,GO:0016491,GO:0046872,GO:0055114,GO:0009055,GO:0051536
maker-tulip_contig_781_pilon_pilon-augustus-gene-5.26-mRNA-1	1
maker-tulip_contig_745_pilon_pilon-augustus-gene-0.18-mRNA-1	1	GO:0016020
augustus_masked-tulip_contig_309_pilon_pilon-processed-gene-0.87-mRNA-1	1	GO:0004252,GO:0006508
maker-tulip_contig_204_pilon_pilon-augustus-gene-1.17-mRNA-1	1	GO:0004252,GO:0006508
maker-tulip_contig_947_pilon_pilon-augustus-gene-0.0-mRNA-1	1
augustus_masked-tulip_contig_254_pilon_pilon-processed-gene-0.37-mRNA-1	1
maker-tulip_contig_109_pilon_pilon-augustus-gene-1.14-mRNA-1	1	GO:0004930,GO:0007186,GO:0016021,GO:0016021
maker-tulip_contig_690_pilon_pilon-augustus-gene-4.94-mRNA-1	1
maker-tulip_contig_372_pilon_pilon-augustus-gene-1.21-mRNA-1	1
maker-tulip_contig_272_pilon_pilon-augustus-gene-2.4-mRNA-1	1	GO:0003712,GO:0006357,GO:0016592
maker-tulip_contig_333_pilon_pilon-augustus-gene-1.42-mRNA-1	1	GO:0003777,GO:0005524,GO:0007018,GO:0005515,GO:0003777,GO:0007018,GO:0003777,GO:0005524,GO:0007018,GO:0008017
maker-tulip_contig_674_pilon_pilon-augustus-gene-3.15-mRNA-1	1
maker-tulip_contig_905_pilon_pilon-augustus-gene-0.58-mRNA-1	1
maker-tulip_contig_284_pilon_pilon-augustus-gene-2.29-mRNA-1	1	GO:0003676,GO:0008270,GO:0008272,GO:0015116,GO:0016021,GO:0008271,GO:0008272,GO:0016020,GO:0055085
augustus_masked-tulip_contig_407_pilon_pilon-processed-gene-2.73-mRNA-1	1
maker-tulip_contig_777_pilon_pilon-augustus-gene-0.70-mRNA-1	1
augustus_masked-tulip_contig_661_pilon_pilon-processed-gene-1.51-mRNA-1	1	GO:0000166,GO:0016021,GO:0005802,GO:0016021,GO:0000287,GO:0004012,GO:0005524,GO:0015914,GO:0016021
maker-tulip_contig_149_pilon_pilon-augustus-gene-0.16-mRNA-1	1
augustus_masked-tulip_contig_674_pilon_pilon-processed-gene-7.59-mRNA-1	1	GO:0005215,GO:0006811,GO:0016020,GO:0016020,GO:0055085
maker-tulip_contig_252_pilon_pilon-augustus-gene-0.21-mRNA-1	1	GO:0004252,GO:0006508
maker-tulip_contig_85_pilon_pilon-augustus-gene-2.20-mRNA-1	1	GO:0005856,GO:0007010,GO:0008092
maker-tulip_contig_121_pilon_pilon-augustus-gene-4.51-mRNA-1	1
augustus_masked-tulip_contig_252_pilon_pilon-processed-gene-1.26-mRNA-1	1
augustus_masked-tulip_contig_773_pilon_pilon-processed-gene-0.1-mRNA-1	1	GO:0004930,GO:0007186,GO:0016021,GO:0016021
maker-tulip_contig_89_pilon_pilon-augustus-gene-0.18-mRNA-1	1
augustus_masked-tulip_contig_317_pilon_pilon-processed-gene-1.90-mRNA-1	1	GO:0005515
augustus_masked-tulip_contig_674_pilon_pilon-processed-gene-11.2-mRNA-1	1
maker-tulip_contig_711_pilon_pilon-augustus-gene-0.42-mRNA-1	1	GO:0005216,GO:0006811,GO:0016020,GO:0055085,GO:0005249,GO:0006813,GO:0008076
maker-tulip_contig_671_pilon_pilon-augustus-gene-0.85-mRNA-1	1
augustus_masked-tulip_contig_656_pilon_pilon-processed-gene-0.14-mRNA-1	1	GO:0003676,GO:0015074
augustus_masked-tulip_contig_586_pilon_pilon-processed-gene-4.59-mRNA-1	1	GO:0004222,GO:0006508,GO:0006508
maker-tulip_contig_43_pilon_pilon-augustus-gene-6.29-mRNA-1	1	GO:0005515
augustus_masked-tulip_contig_228_pilon_pilon-processed-gene-1.17-mRNA-1	1	GO:0004161,GO:0004337,GO:0033384,GO:0045337,GO:0008299
augustus_masked-tulip_contig_441_pilon_pilon-processed-gene-6.13-mRNA-1	1	GO:0004970,GO:0016020
augustus_masked-tulip_contig_109_pilon_pilon-processed-gene-1.54-mRNA-1	1	GO:0005216,GO:0006811,GO:0016020,GO:0055085,GO:0005515,GO:0005262,GO:0016020,GO:0070588
maker-tulip_contig_361_pilon_pilon-augustus-gene-1.13-mRNA-1	1
augustus_masked-tulip_contig_559_pilon_pilon-processed-gene-3.18-mRNA-1	1
maker-tulip_contig_460_pilon_pilon-augustus-gene-0.43-mRNA-1	1	GO:0046856,GO:0052866
augustus_masked-tulip_contig_586_pilon_pilon-processed-gene-6.43-mRNA-1	1
maker-tulip_contig_199_pilon_pilon-augustus-gene-3.47-mRNA-1	1	GO:0008270
maker-tulip_contig_807_pilon_pilon-augustus-gene-3.59-mRNA-1	1
maker-tulip_contig_531_pilon_pilon-augustus-gene-1.11-mRNA-1	1	GO:0030992,GO:0042073,GO:0048487,GO:0060271
maker-tulip_contig_228_pilon_pilon-augustus-gene-1.39-mRNA-1	1	GO:0004161,GO:0004337,GO:0033384,GO:0045337,GO:0008299
augustus_masked-tulip_contig_72_pilon_pilon-processed-gene-0.12-mRNA-1	1	GO:0003676
maker-tulip_contig_294_pilon_pilon-augustus-gene-1.0-mRNA-1	1
maker-tulip_contig_305_pilon_pilon-augustus-gene-0.7-mRNA-1	1	GO:0016020
maker-tulip_contig_360_pilon_pilon-augustus-gene-1.34-mRNA-1	1	GO:0005515,GO:0034464,GO:1905515
maker-tulip_contig_362_pilon_pilon-augustus-gene-5.7-mRNA-1	1	GO:0015631,GO:0030992,GO:0042073,GO:0060271
maker-tulip_contig_196_pilon_pilon-augustus-gene-4.36-mRNA-1	1
augustus_masked-tulip_contig_702_pilon_pilon-processed-gene-0.17-mRNA-1	1	GO:0005515
augustus_masked-tulip_contig_753_pilon_pilon-processed-gene-0.9-mRNA-1	1	GO:0005515
maker-tulip_contig_101_pilon_pilon-augustus-gene-1.26-mRNA-1	1	GO:0003777,GO:0007018,GO:0005524
maker-tulip_contig_101_pilon_pilon-augustus-gene-1.27-mRNA-1	1	GO:0003777,GO:0007018,GO:0003777,GO:0007018,GO:0030286
augustus_masked-tulip_contig_474_pilon_pilon-processed-gene-4.17-mRNA-1	1
maker-tulip_contig_400_pilon_pilon-augustus-gene-0.0-mRNA-1	1
augustus_masked-tulip_contig_474_pilon_pilon-processed-gene-0.139-mRNA-1	1
maker-tulip_contig_204_pilon_pilon-augustus-gene-1.26-mRNA-1	1	GO:0005515,GO:0019904
augustus_masked-tulip_contig_147_pilon_pilon-processed-gene-1.68-mRNA-1	1	GO:0070286
maker-tulip_contig_505_pilon_pilon-augustus-gene-0.3-mRNA-1	1
maker-tulip_contig_843_pilon_pilon-augustus-gene-9.68-mRNA-1	1
augustus_masked-tulip_contig_216_pilon_pilon-processed-gene-0.85-mRNA-1	1
augustus_masked-tulip_contig_85_pilon_pilon-processed-gene-0.4-mRNA-1	1	GO:0004013
maker-tulip_contig_143_pilon_pilon-augustus-gene-2.19-mRNA-1	1
augustus_masked-tulip_contig_2_pilon_pilon-processed-gene-8.3-mRNA-1	1
maker-tulip_contig_33_pilon_pilon-augustus-gene-3.37-mRNA-1	1	GO:0004867
maker-tulip_contig_85_pilon_pilon-augustus-gene-2.22-mRNA-1	1	GO:0005515,GO:0005856,GO:0007010,GO:0008092
maker-tulip_contig_895_pilon_pilon-augustus-gene-2.28-mRNA-1	1	GO:0005515
maker-tulip_contig_473_pilon_pilon-augustus-gene-2.11-mRNA-1	1
augustus_masked-tulip_contig_341_pilon_pilon-processed-gene-0.54-mRNA-1	1
maker-tulip_contig_103_pilon_pilon-augustus-gene-0.16-mRNA-1	1	GO:0016020
maker-tulip_contig_121_pilon_pilon-augustus-gene-4.30-mRNA-1	1
maker-tulip_contig_776_pilon_pilon-augustus-gene-0.45-mRNA-1	1	GO:0004252,GO:0006508
maker-tulip_contig_224_pilon_pilon-augustus-gene-2.24-mRNA-1	1	GO:0004180,GO:0006508,GO:0004181,GO:0006508,GO:0008270
augustus_masked-tulip_contig_148_pilon_pilon-processed-gene-0.55-mRNA-1	1
augustus_masked-tulip_contig_289_pilon_pilon-processed-gene-0.0-mRNA-1	1	GO:0000166,GO:0016788,GO:0046872,GO:0016787,GO:0009166,GO:0016787
augustus_masked-tulip_contig_623_pilon_pilon-processed-gene-5.17-mRNA-1	1	GO:0006629,GO:0052689
maker-tulip_contig_839_pilon_pilon-augustus-gene-1.46-mRNA-1	1
augustus_masked-tulip_contig_321_pilon_pilon-processed-gene-1.16-mRNA-1	1	GO:0052689
maker-tulip_contig_429_pilon_pilon-augustus-gene-0.41-mRNA-1	1	GO:0004185,GO:0006508
maker-tulip_contig_334_pilon_pilon-augustus-gene-2.64-mRNA-1	1
maker-tulip_contig_121_pilon_pilon-augustus-gene-2.8-mRNA-1	1
maker-tulip_contig_407_pilon_pilon-augustus-gene-9.71-mRNA-1	1
augustus_masked-tulip_contig_527_pilon_pilon-processed-gene-0.43-mRNA-1	1	GO:0052689
augustus_masked-tulip_contig_616_pilon_pilon-processed-gene-2.1-mRNA-1	1
maker-tulip_contig_515_pilon_pilon-augustus-gene-7.23-mRNA-1	1	GO:0051015
maker-tulip_contig_412_pilon_pilon-augustus-gene-0.17-mRNA-1	1	GO:0004104
maker-tulip_contig_502_pilon_pilon-augustus-gene-0.3-mRNA-1	1	GO:0005506,GO:0016705,GO:0020037,GO:0055114,GO:0016705,GO:0055114
maker-tulip_contig_121_pilon_pilon-augustus-gene-1.13-mRNA-1	1	GO:0016020
maker-tulip_contig_916_pilon_pilon-augustus-gene-1.15-mRNA-1	1	GO:0006508
maker-tulip_contig_839_pilon_pilon-augustus-gene-1.54-mRNA-1	1
maker-tulip_contig_334_pilon_pilon-augustus-gene-4.32-mRNA-1	1	GO:0031409
augustus_masked-tulip_contig_80_pilon_pilon-processed-gene-0.39-mRNA-1	1	GO:0016758
augustus_masked-tulip_contig_645_pilon_pilon-processed-gene-5.25-mRNA-1	1
maker-tulip_contig_623_pilon_pilon-augustus-gene-2.4-mRNA-1	1	GO:0004930,GO:0007186,GO:0016021,GO:0016021
maker-tulip_contig_187_pilon_pilon-augustus-gene-1.24-mRNA-1	1
maker-tulip_contig_507_pilon_pilon-augustus-gene-2.29-mRNA-1	1	GO:0005515
augustus_masked-tulip_contig_270_pilon_pilon-processed-gene-2.11-mRNA-1	1	GO:0005515
maker-tulip_contig_131_pilon_pilon-augustus-gene-0.64-mRNA-1	1	GO:0005509
maker-tulip_contig_109_pilon_pilon-augustus-gene-0.29-mRNA-1	1
maker-tulip_contig_515_pilon_pilon-augustus-gene-7.13-mRNA-1	1	GO:0003676,GO:0008270
maker-tulip_contig_204_pilon_pilon-augustus-gene-0.0-mRNA-1	1	GO:0005515
maker-tulip_contig_610_pilon_pilon-augustus-gene-3.51-mRNA-1	1	GO:0005096,GO:0051056
maker-tulip_contig_327_pilon_pilon-augustus-gene-0.8-mRNA-1	1	GO:0004930,GO:0007186,GO:0016021,GO:0016021
maker-tulip_contig_188_pilon_pilon-augustus-gene-0.5-mRNA-1	1
augustus_masked-tulip_contig_121_pilon_pilon-processed-gene-4.102-mRNA-1	1	GO:0046872
augustus_masked-tulip_contig_292_pilon_pilon-processed-gene-1.53-mRNA-1	1	GO:0003676
maker-tulip_contig_454_pilon_pilon-augustus-gene-2.36-mRNA-1	1
maker-tulip_contig_82_pilon_pilon-augustus-gene-1.46-mRNA-1	1
maker-tulip_contig_334_pilon_pilon-augustus-gene-1.10-mRNA-1	1	GO:0004672,GO:0005524,GO:0006468,GO:0005524,GO:0004672,GO:0006468
maker-tulip_contig_934_pilon_pilon-augustus-gene-2.13-mRNA-1	1	GO:0005515
augustus_masked-tulip_contig_110_pilon_pilon-processed-gene-1.9-mRNA-1	1	GO:0005515
maker-tulip_contig_199_pilon_pilon-augustus-gene-3.55-mRNA-1	1	GO:0005328,GO:0005328,GO:0006836,GO:0016021
maker-tulip_contig_88_pilon_pilon-augustus-gene-0.82-mRNA-1	1
augustus_masked-tulip_contig_234_pilon_pilon-processed-gene-5.50-mRNA-1	1	GO:0004383,GO:0006182,GO:0009190,GO:0016849,GO:0035556
maker-tulip_contig_623_pilon_pilon-augustus-gene-1.26-mRNA-1	1
maker-tulip_contig_2_pilon_pilon-augustus-gene-4.10-mRNA-1	1	GO:0003677,GO:0046983,GO:0003700,GO:0006355,GO:0003677,GO:0006355
maker-tulip_contig_648_pilon_pilon-augustus-gene-2.29-mRNA-1	1	GO:0003924,GO:0005525,GO:0005525,GO:0007165,GO:0016020
maker-tulip_contig_303_pilon_pilon-augustus-gene-2.16-mRNA-1	1
augustus_masked-tulip_contig_279_pilon_pilon-processed-gene-3.9-mRNA-1	1
maker-tulip_contig_834_pilon_pilon-augustus-gene-0.23-mRNA-1	1	GO:0005085,GO:0005622,GO:0007264,GO:0005089,GO:0035023,GO:0005085,GO:0035023,GO:0046578,GO:0005085,GO:0007264
augustus_masked-tulip_contig_515_pilon_pilon-processed-gene-3.69-mRNA-1	1	GO:0004672,GO:0005524,GO:0006468,GO:0016021,GO:0009190,GO:0016849,GO:0035556,GO:0004672,GO:0006468
augustus_masked-tulip_contig_340_pilon_pilon-processed-gene-0.84-mRNA-1	1
augustus_masked-tulip_contig_384_pilon_pilon-processed-gene-0.122-mRNA-1	1	GO:0004930,GO:0007186,GO:0016021,GO:0016021
maker-tulip_contig_934_pilon_pilon-augustus-gene-4.25-mRNA-1	1	GO:0005515,GO:0007268,GO:0033130,GO:0043495
maker-tulip_contig_531_pilon_pilon-augustus-gene-2.0-mRNA-1	1	GO:0003777,GO:0007018,GO:0005524,GO:0016887,GO:0005524,GO:0003777,GO:0007018,GO:0030286
augustus_masked-tulip_contig_247_pilon_pilon-processed-gene-2.211-mRNA-1	1
maker-tulip_contig_412_pilon_pilon-augustus-gene-0.12-mRNA-1	1	GO:0016020,GO:0022857,GO:0055085,GO:0016021,GO:0022857,GO:0055085
augustus_masked-tulip_contig_604_pilon_pilon-processed-gene-0.41-mRNA-1	1	GO:0004970,GO:0016020,GO:0005216,GO:0006811,GO:0016020,GO:0038023
maker-tulip_contig_781_pilon_pilon-augustus-gene-1.36-mRNA-1	1	GO:0000723,GO:0003678,GO:0006281
maker-tulip_contig_841_pilon_pilon-augustus-gene-0.4-mRNA-1	1
maker-tulip_contig_516_pilon_pilon-augustus-gene-0.4-mRNA-1	1
maker-tulip_contig_90_pilon_pilon-augustus-gene-0.63-mRNA-1	1
augustus_masked-tulip_contig_1_pilon_pilon-processed-gene-2.8-mRNA-1	1	GO:0004930,GO:0007186,GO:0016021,GO:0016021
maker-tulip_contig_407_pilon_pilon-augustus-gene-1.53-mRNA-1	1	GO:0006486,GO:0008373
augustus_masked-tulip_contig_66_pilon_pilon-processed-gene-3.11-mRNA-1	1	GO:0003676
augustus_masked-tulip_contig_224_pilon_pilon-processed-gene-1.4-mRNA-1	1
augustus_masked-tulip_contig_224_pilon_pilon-processed-gene-1.3-mRNA-1	1	GO:0005515
augustus_masked-tulip_contig_586_pilon_pilon-processed-gene-0.84-mRNA-1	1
maker-tulip_contig_49_pilon_pilon-augustus-gene-0.2-mRNA-1	1
maker-tulip_contig_244_pilon_pilon-augustus-gene-0.54-mRNA-1	1	GO:0005515
augustus_masked-tulip_contig_448_pilon_pilon-processed-gene-0.20-mRNA-1	1	GO:0004445,GO:0046856
maker-tulip_contig_121_pilon_pilon-augustus-gene-4.6-mRNA-1	1
augustus_masked-tulip_contig_860_pilon_pilon-processed-gene-6.45-mRNA-1	1
augustus_masked-tulip_contig_301_pilon_pilon-processed-gene-0.1-mRNA-1	1	GO:0006508,GO:0008237,GO:0008241,GO:0016020
maker-tulip_contig_327_pilon_pilon-augustus-gene-9.29-mRNA-1	1
maker-tulip_contig_20_pilon_pilon-augustus-gene-0.28-mRNA-1	1
augustus_masked-tulip_contig_586_pilon_pilon-processed-gene-8.27-mRNA-1	1	GO:0005515
maker-tulip_contig_711_pilon_pilon-augustus-gene-2.60-mRNA-1	1	GO:0006470,GO:0008138,GO:0016311,GO:0016791,GO:0008138,GO:0016311
maker-tulip_contig_451_pilon_pilon-augustus-gene-1.20-mRNA-1	1	GO:0005515
maker-tulip_contig_546_pilon_pilon-augustus-gene-0.49-mRNA-1	1	GO:0003700,GO:0005634,GO:0006355,GO:0008270
augustus_masked-tulip_contig_322_pilon_pilon-processed-gene-0.44-mRNA-1	1	GO:0052689
maker-tulip_contig_287_pilon_pilon-augustus-gene-1.116-mRNA-1	1	GO:0004252,GO:0006508
augustus_masked-tulip_contig_215_pilon_pilon-processed-gene-1.38-mRNA-1	1	GO:0004553,GO:0005975,GO:0008061,GO:0005975
maker-tulip_contig_199_pilon_pilon-augustus-gene-4.70-mRNA-1	1
maker-tulip_contig_34_pilon_pilon-augustus-gene-0.124-mRNA-1	1	GO:0004252,GO:0006508
augustus_masked-tulip_contig_356_pilon_pilon-processed-gene-1.7-mRNA-1	1
augustus_masked-tulip_contig_854_pilon_pilon-processed-gene-0.26-mRNA-1	1	GO:0005634,GO:0006355,GO:0030374,GO:0046983
maker-tulip_contig_786_pilon_pilon-augustus-gene-0.1-mRNA-1	1	GO:0004672,GO:0005524,GO:0006468,GO:0005524,GO:0004713,GO:0006468,GO:0004672,GO:0006468
augustus_masked-tulip_contig_498_pilon_pilon-processed-gene-0.85-mRNA-1	1
maker-tulip_contig_669_pilon_pilon-augustus-gene-0.10-mRNA-1	1	GO:0005515
augustus_masked-tulip_contig_387_pilon_pilon-processed-gene-1.2-mRNA-1	1
augustus_masked-tulip_contig_529_pilon_pilon-processed-gene-1.71-mRNA-1	1	GO:0016788
maker-tulip_contig_236_pilon_pilon-augustus-gene-0.18-mRNA-1	1
maker-tulip_contig_408_pilon_pilon-augustus-gene-0.29-mRNA-1	1	GO:0005249,GO:0006813,GO:0016020
augustus_masked-tulip_contig_217_pilon_pilon-processed-gene-0.1-mRNA-1	1	GO:0004930,GO:0007186,GO:0016021,GO:0004965,GO:0007186,GO:0016021
augustus_masked-tulip_contig_205_pilon_pilon-processed-gene-0.6-mRNA-1	1
augustus_masked-tulip_contig_274_pilon_pilon-processed-gene-2.18-mRNA-1	1
maker-tulip_contig_34_pilon_pilon-augustus-gene-0.100-mRNA-1	1	GO:0004252,GO:0006508
augustus_masked-tulip_contig_693_pilon_pilon-processed-gene-2.3-mRNA-1	1	GO:0003676
maker-tulip_contig_457_pilon_pilon-augustus-gene-0.0-mRNA-1	1
maker-tulip_contig_37_pilon_pilon-augustus-gene-2.55-mRNA-1	1
augustus_masked-tulip_contig_37_pilon_pilon-processed-gene-3.23-mRNA-1	1	GO:0006629,GO:0016788
augustus_masked-tulip_contig_224_pilon_pilon-processed-gene-1.6-mRNA-1	1	GO:0004497,GO:0005506,GO:0020037,GO:0055114,GO:0005506,GO:0016705,GO:0020037,GO:0055114
maker-tulip_contig_43_pilon_pilon-augustus-gene-0.22-mRNA-1	1	GO:0005267,GO:0016020,GO:0071805
augustus_masked-tulip_contig_172_pilon_pilon-processed-gene-0.2-mRNA-1	1	GO:0005515
maker-tulip_contig_323_pilon_pilon-augustus-gene-3.26-mRNA-1	1	GO:0005887,GO:0038062
augustus_masked-tulip_contig_907_pilon_pilon-processed-gene-5.28-mRNA-1	1	GO:0003676
augustus_masked-tulip_contig_280_pilon_pilon-processed-gene-2.14-mRNA-1	1	GO:0003676
maker-tulip_contig_37_pilon_pilon-augustus-gene-2.56-mRNA-1	1	GO:0004930,GO:0007186,GO:0016021
augustus_masked-tulip_contig_67_pilon_pilon-processed-gene-0.2-mRNA-1	1
maker-tulip_contig_407_pilon_pilon-augustus-gene-4.42-mRNA-1	1
maker-tulip_contig_611_pilon_pilon-augustus-gene-0.1-mRNA-1	1	GO:0005515
maker-tulip_contig_837_pilon_pilon-augustus-gene-9.20-mRNA-1	1
augustus_masked-tulip_contig_867_pilon_pilon-processed-gene-1.4-mRNA-1	1	GO:0003676
maker-tulip_contig_270_pilon_pilon-augustus-gene-2.80-mRNA-1	1
maker-tulip_contig_895_pilon_pilon-augustus-gene-3.22-mRNA-1	1
maker-tulip_contig_441_pilon_pilon-augustus-gene-7.14-mRNA-1	1	GO:0003824,GO:0016715,GO:0055114,GO:0004497,GO:0005507,GO:0016715,GO:0055114,GO:0003824,GO:0006518,GO:0016020
maker-tulip_contig_33_pilon_pilon-augustus-gene-5.0-mRNA-1	1
maker-tulip_contig_216_pilon_pilon-augustus-gene-0.41-mRNA-1	1	GO:0005216,GO:0006811,GO:0016020,GO:0055085,GO:0005261
maker-tulip_contig_81_pilon_pilon-augustus-gene-5.10-mRNA-1	1	GO:0004930,GO:0007186,GO:0016021
maker-tulip_contig_128_pilon_pilon-augustus-gene-0.2-mRNA-1	1
augustus_masked-tulip_contig_307_pilon_pilon-processed-gene-1.41-mRNA-1	1
augustus_masked-tulip_contig_653_pilon_pilon-processed-gene-0.182-mRNA-1	1	GO:0003824
maker-tulip_contig_44_pilon_pilon-augustus-gene-3.0-mRNA-1	1
maker-tulip_contig_199_pilon_pilon-augustus-gene-4.38-mRNA-1	1
augustus_masked-tulip_contig_407_pilon_pilon-processed-gene-2.71-mRNA-1	1	GO:0005216,GO:0006811,GO:0016020,GO:0055085,GO:0005249,GO:0006813,GO:0016020
augustus_masked-tulip_contig_199_pilon_pilon-processed-gene-1.40-mRNA-1	1
maker-tulip_contig_781_pilon_pilon-augustus-gene-2.20-mRNA-1	1
augustus_masked-tulip_contig_199_pilon_pilon-processed-gene-0.12-mRNA-1	1	GO:0003676
augustus_masked-tulip_contig_22_pilon_pilon-processed-gene-1.19-mRNA-1	1
augustus_masked-tulip_contig_571_pilon_pilon-processed-gene-0.1-mRNA-1	1
maker-tulip_contig_837_pilon_pilon-augustus-gene-7.47-mRNA-1	1	GO:0005524,GO:0016887,GO:0016021,GO:0042626,GO:0055085
augustus_masked-tulip_contig_236_pilon_pilon-processed-gene-3.17-mRNA-1	1	GO:0003995,GO:0055114,GO:0016627,GO:0055114,GO:0016627,GO:0050660,GO:0055114
augustus_masked-tulip_contig_208_pilon_pilon-processed-gene-1.28-mRNA-1	1
maker-tulip_contig_590_pilon_pilon-augustus-gene-0.12-mRNA-1	1	GO:0005856
maker-tulip_contig_555_pilon_pilon-augustus-gene-0.20-mRNA-1	1	GO:0003824
augustus_masked-tulip_contig_317_pilon_pilon-processed-gene-1.89-mRNA-1	1
maker-tulip_contig_553_pilon_pilon-augustus-gene-0.82-mRNA-1	1	GO:0003676,GO:0003676,GO:0004523
maker-tulip_contig_2_pilon_pilon-augustus-gene-8.14-mRNA-1	1	GO:0003824,GO:0033961
maker-tulip_contig_35_pilon_pilon-augustus-gene-0.31-mRNA-1	1
augustus_masked-tulip_contig_35_pilon_pilon-processed-gene-0.117-mRNA-1	1
augustus_masked-tulip_contig_715_pilon_pilon-processed-gene-4.7-mRNA-1	1
maker-tulip_contig_52_pilon_pilon-augustus-gene-0.10-mRNA-1	1
augustus_masked-tulip_contig_121_pilon_pilon-processed-gene-3.37-mRNA-1	1	GO:0003700,GO:0006355,GO:0043565
augustus_masked-tulip_contig_381_pilon_pilon-processed-gene-0.44-mRNA-1	1	GO:0016614,GO:0050660,GO:0055114,GO:0016614,GO:0055114
maker-tulip_contig_363_pilon_pilon-augustus-gene-1.19-mRNA-1	1	GO:0016491,GO:0055114
augustus_masked-tulip_contig_407_pilon_pilon-processed-gene-7.6-mRNA-1	1
maker-tulip_contig_424_pilon_pilon-augustus-gene-1.17-mRNA-1	1	GO:0005515
maker-tulip_contig_290_pilon_pilon-augustus-gene-0.5-mRNA-1	1	GO:0003723,GO:0042803,GO:0045450
augustus_masked-tulip_contig_351_pilon_pilon-processed-gene-1.112-mRNA-1	1	GO:0005634,GO:0006260
augustus_masked-tulip_contig_159_pilon_pilon-processed-gene-1.68-mRNA-1	1	GO:0006338,GO:0031011
augustus_masked-tulip_contig_718_pilon_pilon-processed-gene-0.7-mRNA-1	1
maker-tulip_contig_177_pilon_pilon-augustus-gene-0.62-mRNA-1	1
maker-tulip_contig_2_pilon_pilon-augustus-gene-2.42-mRNA-1	1
augustus_masked-tulip_contig_705_pilon_pilon-processed-gene-0.27-mRNA-1	1	GO:0003677,GO:0006355,GO:0043565
maker-tulip_contig_422_pilon_pilon-augustus-gene-0.15-mRNA-1	1	GO:0003677,GO:0006355,GO:0043565
maker-tulip_contig_236_pilon_pilon-augustus-gene-4.47-mRNA-1	1	GO:0004672,GO:0005524,GO:0006468,GO:0005515,GO:0004672,GO:0006468
maker-tulip_contig_121_pilon_pilon-augustus-gene-4.20-mRNA-1	1
maker-tulip_contig_555_pilon_pilon-augustus-gene-0.33-mRNA-1	1	GO:0005515,GO:0010997,GO:0097027,GO:1904668
augustus_masked-tulip_contig_636_pilon_pilon-processed-gene-0.11-mRNA-1	1
augustus_masked-tulip_contig_711_pilon_pilon-processed-gene-2.24-mRNA-1	1	GO:0005634,GO:0006915
maker-tulip_contig_128_pilon_pilon-augustus-gene-0.7-mRNA-1	1
maker-tulip_contig_168_pilon_pilon-augustus-gene-1.24-mRNA-1	1	GO:0004930,GO:0007186,GO:0016021,GO:0016021
maker-tulip_contig_581_pilon_pilon-augustus-gene-0.2-mRNA-1	1
maker-tulip_contig_593_pilon_pilon-augustus-gene-0.10-mRNA-1	1	GO:0003677,GO:0003707,GO:0005634,GO:0006355,GO:0006355,GO:0008270,GO:0003700,GO:0005634,GO:0006355,GO:0008270,GO:0043565,GO:0003677,GO:0004887,GO:0005634,GO:0006355
maker-tulip_contig_394_pilon_pilon-augustus-gene-4.32-mRNA-1	1	GO:0005515
maker-tulip_contig_278_pilon_pilon-augustus-gene-0.77-mRNA-1	1
maker-tulip_contig_380_pilon_pilon-augustus-gene-2.10-mRNA-1	1	GO:0005515
maker-tulip_contig_778_pilon_pilon-augustus-gene-1.17-mRNA-1	1	GO:0003676,GO:0008270
maker-tulip_contig_407_pilon_pilon-augustus-gene-4.69-mRNA-1	1
maker-tulip_contig_59_pilon_pilon-augustus-gene-1.36-mRNA-1	1
maker-tulip_contig_287_pilon_pilon-augustus-gene-1.125-mRNA-1	1
maker-tulip_contig_43_pilon_pilon-augustus-gene-2.6-mRNA-1	1	GO:0005515
augustus_masked-tulip_contig_95_pilon_pilon-processed-gene-0.20-mRNA-1	1
maker-tulip_contig_192_pilon_pilon-augustus-gene-1.49-mRNA-1	1
augustus_masked-tulip_contig_689_pilon_pilon-processed-gene-1.6-mRNA-1	1
augustus_masked-tulip_contig_161_pilon_pilon-processed-gene-0.15-mRNA-1	1
maker-tulip_contig_648_pilon_pilon-augustus-gene-2.27-mRNA-1	1
maker-tulip_contig_837_pilon_pilon-augustus-gene-3.3-mRNA-1	1	GO:0016491
maker-tulip_contig_938_pilon_pilon-augustus-gene-0.2-mRNA-1	1
maker-tulip_contig_674_pilon_pilon-augustus-gene-0.18-mRNA-1	1	GO:0004672,GO:0005524,GO:0006468,GO:0004674,GO:0005524,GO:0006468,GO:0004672,GO:0006468
maker-tulip_contig_895_pilon_pilon-augustus-gene-2.26-mRNA-1	1	GO:0003677
maker-tulip_contig_732_pilon_pilon-augustus-gene-0.0-mRNA-1	1
augustus_masked-tulip_contig_610_pilon_pilon-processed-gene-3.6-mRNA-1	1
maker-tulip_contig_35_pilon_pilon-augustus-gene-0.30-mRNA-1	1	GO:0071209
maker-tulip_contig_697_pilon_pilon-augustus-gene-2.4-mRNA-1	1
maker-tulip_contig_429_pilon_pilon-augustus-gene-0.35-mRNA-1	1
maker-tulip_contig_407_pilon_pilon-augustus-gene-7.45-mRNA-1	1
maker-tulip_contig_406_pilon_pilon-augustus-gene-0.30-mRNA-1	1
augustus_masked-tulip_contig_329_pilon_pilon-processed-gene-0.39-mRNA-1	1	GO:0005634,GO:0006355,GO:0008270,GO:0032786
maker-tulip_contig_603_pilon_pilon-augustus-gene-2.22-mRNA-1	1	GO:0005515
augustus_masked-tulip_contig_72_pilon_pilon-processed-gene-0.5-mRNA-1	1
maker-tulip_contig_206_pilon_pilon-augustus-gene-0.1-mRNA-1	1
maker-tulip_contig_504_pilon_pilon-augustus-gene-2.9-mRNA-1	1	GO:0005794,GO:0007165
maker-tulip_contig_732_pilon_pilon-augustus-gene-3.24-mRNA-1	1	GO:0003676,GO:0005634,GO:0008270
augustus_masked-tulip_contig_807_pilon_pilon-processed-gene-3.101-mRNA-1	1
maker-tulip_contig_77_pilon_pilon-augustus-gene-0.96-mRNA-1	1
maker-tulip_contig_523_pilon_pilon-augustus-gene-0.118-mRNA-1	1	GO:0046983
maker-tulip_contig_217_pilon_pilon-augustus-gene-3.19-mRNA-1	1	GO:0004843,GO:0016579,GO:0016579,GO:0016787
augustus_masked-tulip_contig_550_pilon_pilon-processed-gene-0.23-mRNA-1	1
augustus_masked-tulip_contig_611_pilon_pilon-processed-gene-3.20-mRNA-1	1	GO:0016020,GO:0022857,GO:0055085
maker-tulip_contig_784_pilon_pilon-augustus-gene-0.12-mRNA-1	1	GO:0003676,GO:0008270
maker-tulip_contig_378_pilon_pilon-augustus-gene-2.32-mRNA-1	1	GO:0003723,GO:0016787,GO:0030145,GO:0016787
maker-tulip_contig_89_pilon_pilon-augustus-gene-3.29-mRNA-1	1	GO:0005515
augustus_masked-tulip_contig_855_pilon_pilon-processed-gene-3.16-mRNA-1	1
maker-tulip_contig_356_pilon_pilon-augustus-gene-1.25-mRNA-1	1
maker-tulip_contig_340_pilon_pilon-augustus-gene-0.24-mRNA-1	1
maker-tulip_contig_257_pilon_pilon-augustus-gene-0.26-mRNA-1	1	GO:0005515
maker-tulip_contig_236_pilon_pilon-augustus-gene-4.38-mRNA-1	1	GO:0005634,GO:0006281
maker-tulip_contig_234_pilon_pilon-augustus-gene-1.31-mRNA-1	1	GO:0003676,GO:0008270
maker-tulip_contig_585_pilon_pilon-augustus-gene-0.14-mRNA-1	1
maker-tulip_contig_691_pilon_pilon-augustus-gene-0.6-mRNA-1	1	GO:0003824,GO:0006281,GO:0003908,GO:0006281
augustus_masked-tulip_contig_715_pilon_pilon-processed-gene-5.14-mRNA-1	1	GO:0001731,GO:0003743,GO:0003743,GO:0006413,GO:0003723
maker-tulip_contig_327_pilon_pilon-augustus-gene-1.26-mRNA-1	1	GO:0000808,GO:0005634,GO:0006260
maker-tulip_contig_523_pilon_pilon-augustus-gene-0.129-mRNA-1	1	GO:0004407,GO:0016575
maker-tulip_contig_159_pilon_pilon-augustus-gene-2.22-mRNA-1	1
maker-tulip_contig_68_pilon_pilon-augustus-gene-0.2-mRNA-1	1	GO:0003676
maker-tulip_contig_211_pilon_pilon-augustus-gene-1.82-mRNA-1	1
maker-tulip_contig_841_pilon_pilon-augustus-gene-0.69-mRNA-1	1
maker-tulip_contig_211_pilon_pilon-augustus-gene-2.31-mRNA-1	1	GO:0003677,GO:0006260
maker-tulip_contig_504_pilon_pilon-augustus-gene-2.28-mRNA-1	1	GO:0005515
maker-tulip_contig_711_pilon_pilon-augustus-gene-0.35-mRNA-1	1	GO:0003676,GO:0005524
augustus_masked-tulip_contig_209_pilon_pilon-processed-gene-0.30-mRNA-1	1
maker-tulip_contig_187_pilon_pilon-augustus-gene-1.26-mRNA-1	1	GO:0000079,GO:0010389,GO:0019901,GO:0005634
augustus_masked-tulip_contig_189_pilon_pilon-processed-gene-0.11-mRNA-1	1	GO:0006479,GO:0008168
maker-tulip_contig_333_pilon_pilon-augustus-gene-1.23-mRNA-1	1
augustus_masked-tulip_contig_234_pilon_pilon-processed-gene-1.59-mRNA-1	1	GO:0000178,GO:0003723,GO:0003723
maker-tulip_contig_697_pilon_pilon-augustus-gene-1.20-mRNA-1	1	GO:0000166,GO:0004812,GO:0005524,GO:0006418,GO:0004814,GO:0005524,GO:0006420
augustus_masked-tulip_contig_443_pilon_pilon-processed-gene-1.13-mRNA-1	1	GO:0016491,GO:0055114
maker-tulip_contig_77_pilon_pilon-augustus-gene-0.107-mRNA-1	1	GO:0005515,GO:0031080
maker-tulip_contig_361_pilon_pilon-augustus-gene-1.10-mRNA-1	1	GO:0000049,GO:0002098,GO:0034227
maker-tulip_contig_381_pilon_pilon-augustus-gene-0.118-mRNA-1	1
augustus_masked-tulip_contig_547_pilon_pilon-processed-gene-2.20-mRNA-1	1	GO:0003697,GO:0005666
maker-tulip_contig_677_pilon_pilon-augustus-gene-1.2-mRNA-1	1	GO:0006400,GO:0008176,GO:0008176
maker-tulip_contig_208_pilon_pilon-augustus-gene-1.89-mRNA-1	1	GO:0003924,GO:0005525,GO:0005525,GO:0003924,GO:0005525,GO:0006913
augustus_masked-tulip_contig_584_pilon_pilon-processed-gene-0.22-mRNA-1	1	GO:0001522,GO:0003723,GO:0009451,GO:0009982,GO:0003723,GO:0009982
maker-tulip_contig_480_pilon_pilon-augustus-gene-0.3-mRNA-1	1	GO:0004146,GO:0006545,GO:0046654,GO:0050661,GO:0055114,GO:0004146,GO:0055114,GO:0004146,GO:0046654,GO:0055114
maker-tulip_contig_498_pilon_pilon-augustus-gene-0.21-mRNA-1	1	GO:0000166,GO:0003676,GO:0003887,GO:0005515,GO:0003887,GO:0005634,GO:0006260,GO:0008270,GO:0003677,GO:0003887,GO:0006260,GO:0006281,GO:0008622,GO:0003676,GO:0000166,GO:0003677
maker-tulip_contig_360_pilon_pilon-augustus-gene-2.24-mRNA-1	1
maker-tulip_contig_362_pilon_pilon-augustus-gene-6.7-mRNA-1	1	GO:0005506,GO:0016705,GO:0020037,GO:0055114
maker-tulip_contig_623_pilon_pilon-augustus-gene-1.46-mRNA-1	1	GO:0005634
augustus_masked-tulip_contig_781_pilon_pilon-processed-gene-2.33-mRNA-1	1	GO:0003677,GO:0005524,GO:0006260,GO:0003677,GO:0005524,GO:0006270,GO:0042555,GO:0003677,GO:0005524,GO:0006270
maker-tulip_contig_59_pilon_pilon-augustus-gene-1.93-mRNA-1	1
augustus_masked-tulip_contig_687_pilon_pilon-processed-gene-0.12-mRNA-1	1
maker-tulip_contig_773_pilon_pilon-augustus-gene-3.29-mRNA-1	1	GO:0003723,GO:0005515
maker-tulip_contig_586_pilon_pilon-augustus-gene-0.33-mRNA-1	1	GO:0003723,GO:0003743,GO:0005737,GO:0006413
maker-tulip_contig_230_pilon_pilon-augustus-gene-0.55-mRNA-1	1	GO:0003676,GO:0005524
maker-tulip_contig_114_pilon_pilon-augustus-gene-0.9-mRNA-1	1	GO:0000166,GO:0004812,GO:0005524,GO:0006418,GO:0004814,GO:0005524,GO:0006420
maker-tulip_contig_40_pilon_pilon-augustus-gene-0.6-mRNA-1	1	GO:0003676
augustus_masked-tulip_contig_714_pilon_pilon-processed-gene-0.90-mRNA-1	1	GO:0005524,GO:0006464
maker-tulip_contig_424_pilon_pilon-augustus-gene-2.24-mRNA-1	1
maker-tulip_contig_59_pilon_pilon-augustus-gene-1.80-mRNA-1	1	GO:0006364
maker-tulip_contig_274_pilon_pilon-augustus-gene-1.0-mRNA-1	1
augustus_masked-tulip_contig_454_pilon_pilon-processed-gene-3.17-mRNA-1	1	GO:0004861,GO:0005634,GO:0007050
maker-tulip_contig_623_pilon_pilon-augustus-gene-1.35-mRNA-1	1	GO:0003684,GO:0005634,GO:0006289
maker-tulip_contig_477_pilon_pilon-augustus-gene-1.40-mRNA-1	1	GO:0006270
augustus_masked-tulip_contig_604_pilon_pilon-processed-gene-0.37-mRNA-1	1	GO:0005515,GO:0016567,GO:0031436,GO:0043065
augustus_masked-tulip_contig_666_pilon_pilon-processed-gene-0.56-mRNA-1	1	GO:0003678,GO:0005524,GO:0031011,GO:0043141,GO:0031011,GO:0035267,GO:0043141,GO:0097255
maker-tulip_contig_360_pilon_pilon-augustus-gene-0.47-mRNA-1	1	GO:0005515
augustus_masked-tulip_contig_514_pilon_pilon-processed-gene-1.55-mRNA-1	1	GO:0000915,GO:0003777,GO:0072383,GO:0003777,GO:0007018,GO:0003777,GO:0005524,GO:0007018,GO:0008017,GO:0003777,GO:0005524,GO:0007018
maker-tulip_contig_39_pilon_pilon-augustus-gene-0.18-mRNA-1	1	GO:0003676,GO:0005524
maker-tulip_contig_305_pilon_pilon-augustus-gene-0.13-mRNA-1	1	GO:0005634,GO:0031144,GO:0071630
maker-tulip_contig_507_pilon_pilon-augustus-gene-1.37-mRNA-1	1	GO:0000776,GO:0034508
augustus_masked-tulip_contig_491_pilon_pilon-processed-gene-1.88-mRNA-1	1	GO:0003677,GO:0051539,GO:0006284,GO:0003906,GO:0005634,GO:0006281,GO:0006285,GO:0019104,GO:0003824,GO:0006281
maker-tulip_contig_571_pilon_pilon-augustus-gene-0.92-mRNA-1	1	GO:0003676
maker-tulip_contig_89_pilon_pilon-augustus-gene-0.9-mRNA-1	1
augustus_masked-tulip_contig_247_pilon_pilon-processed-gene-1.72-mRNA-1	1	GO:0003899,GO:0006383
augustus_masked-tulip_contig_345_pilon_pilon-processed-gene-0.11-mRNA-1	1	GO:0000387,GO:0032797
augustus_masked-tulip_contig_407_pilon_pilon-processed-gene-8.19-mRNA-1	1
maker-tulip_contig_451_pilon_pilon-augustus-gene-1.38-mRNA-1	1	GO:0003723,GO:0004000,GO:0006396
maker-tulip_contig_491_pilon_pilon-augustus-gene-1.66-mRNA-1	1
maker-tulip_contig_759_pilon_pilon-augustus-gene-1.115-mRNA-1	1	GO:0003684,GO:0004519,GO:0005634,GO:0006281
maker-tulip_contig_748_pilon_pilon-augustus-gene-1.32-mRNA-1	1	GO:0005634,GO:0006281,GO:0008081
maker-tulip_contig_22_pilon_pilon-augustus-gene-0.12-mRNA-1	1
maker-tulip_contig_584_pilon_pilon-augustus-gene-0.9-mRNA-1	1
maker-tulip_contig_126_pilon_pilon-augustus-gene-0.27-mRNA-1	1
maker-tulip_contig_854_pilon_pilon-augustus-gene-1.49-mRNA-1	1	GO:0003676,GO:0003723
maker-tulip_contig_773_pilon_pilon-augustus-gene-3.30-mRNA-1	1
maker-tulip_contig_35_pilon_pilon-augustus-gene-0.32-mRNA-1	1
augustus_masked-tulip_contig_70_pilon_pilon-processed-gene-0.72-mRNA-1	1	GO:0003676
maker-tulip_contig_90_pilon_pilon-augustus-gene-0.60-mRNA-1	1	GO:0006360
maker-tulip_contig_441_pilon_pilon-augustus-gene-1.164-mRNA-1	1
maker-tulip_contig_636_pilon_pilon-augustus-gene-0.43-mRNA-1	1
maker-tulip_contig_307_pilon_pilon-augustus-gene-1.66-mRNA-1	1	GO:0003677
maker-tulip_contig_21_pilon_pilon-augustus-gene-0.21-mRNA-1	1	GO:0004045
maker-tulip_contig_491_pilon_pilon-augustus-gene-1.8-mRNA-1	1
maker-tulip_contig_711_pilon_pilon-augustus-gene-1.21-mRNA-1	1	GO:0000172,GO:0001682,GO:0005655
augustus_masked-tulip_contig_456_pilon_pilon-processed-gene-0.19-mRNA-1	1
maker-tulip_contig_654_pilon_pilon-augustus-gene-1.112-mRNA-1	1	GO:0003684,GO:0006289,GO:0008534,GO:0006284,GO:0003824,GO:0006281
augustus_masked-tulip_contig_317_pilon_pilon-processed-gene-1.78-mRNA-1	1	GO:0006725,GO:0008198,GO:0016491,GO:0008270,GO:0016701,GO:0055114
maker-tulip_contig_284_pilon_pilon-augustus-gene-2.17-mRNA-1	1	GO:0005524,GO:0006139,GO:0019206
maker-tulip_contig_194_pilon_pilon-augustus-gene-1.5-mRNA-1	1
maker-tulip_contig_895_pilon_pilon-augustus-gene-2.47-mRNA-1	1
maker-tulip_contig_290_pilon_pilon-augustus-gene-5.45-mRNA-1	1	GO:0003677,GO:0003678,GO:0005524,GO:0005634,GO:0006270,GO:0042555,GO:0003677,GO:0005524,GO:0006270,GO:0003677,GO:0005524,GO:0006260
augustus_masked-tulip_contig_52_pilon_pilon-processed-gene-2.13-mRNA-1	1	GO:0004672,GO:0005524,GO:0006468,GO:0005524
augustus_masked-tulip_contig_733_pilon_pilon-processed-gene-0.8-mRNA-1	1	GO:0000387,GO:0005681,GO:0000398,GO:0005732
augustus_masked-tulip_contig_343_pilon_pilon-processed-gene-0.84-mRNA-1	1	GO:0000387,GO:0006396
maker-tulip_contig_281_pilon_pilon-augustus-gene-1.0-mRNA-1	1	GO:0000398,GO:0000956,GO:0003723
maker-tulip_contig_59_pilon_pilon-augustus-gene-0.39-mRNA-1	1	GO:0000278,GO:0003712,GO:0005667,GO:0008134,GO:0003700,GO:0005667,GO:0051726,GO:0003700,GO:0005667,GO:0006355
maker-tulip_contig_711_pilon_pilon-augustus-gene-2.43-mRNA-1	1
maker-tulip_contig_33_pilon_pilon-augustus-gene-1.53-mRNA-1	1	GO:0005525
augustus_masked-tulip_contig_485_pilon_pilon-processed-gene-0.26-mRNA-1	1	GO:0000398,GO:0005681
maker-tulip_contig_611_pilon_pilon-augustus-gene-3.56-mRNA-1	1	GO:0003676,GO:0005634,GO:0006281,GO:0005515
maker-tulip_contig_145_pilon_pilon-augustus-gene-2.35-mRNA-1	1	GO:0004799,GO:0006231
maker-tulip_contig_344_pilon_pilon-augustus-gene-0.2-mRNA-1	1	GO:0003676
maker-tulip_contig_482_pilon_pilon-augustus-gene-2.7-mRNA-1	1	GO:0003677,GO:0006275,GO:0003677,GO:0006275,GO:0030337
maker-tulip_contig_870_pilon_pilon-augustus-gene-4.131-mRNA-1	1	GO:0003677,GO:0005524,GO:0006260,GO:0003688,GO:0005524,GO:0005634,GO:0006270,GO:0042555,GO:0003677,GO:0005524,GO:0006270
maker-tulip_contig_731_pilon_pilon-augustus-gene-0.30-mRNA-1	1	GO:0003677,GO:0003678,GO:0005524,GO:0005634,GO:0006270,GO:0042555,GO:0003677,GO:0005524,GO:0006270,GO:0003677,GO:0005524,GO:0006260
maker-tulip_contig_360_pilon_pilon-augustus-gene-1.37-mRNA-1	1	GO:0003677,GO:0003678,GO:0005524,GO:0006270,GO:0042555,GO:0003677,GO:0005524,GO:0006270,GO:0003677,GO:0005524,GO:0006260
augustus_masked-tulip_contig_217_pilon_pilon-processed-gene-3.66-mRNA-1	1	GO:0005515
maker-tulip_contig_59_pilon_pilon-augustus-gene-2.64-mRNA-1	1	GO:0006275
maker-tulip_contig_623_pilon_pilon-augustus-gene-4.83-mRNA-1	1	GO:0005524,GO:0006139,GO:0019206
maker-tulip_contig_211_pilon_pilon-augustus-gene-2.43-mRNA-1	1	GO:0003723,GO:0003729
maker-tulip_contig_585_pilon_pilon-augustus-gene-0.12-mRNA-1	1
maker-tulip_contig_175_pilon_pilon-augustus-gene-2.4-mRNA-1	1	GO:0000077,GO:0005730,GO:0030896,GO:0000077,GO:0030896
maker-tulip_contig_237_pilon_pilon-augustus-gene-0.35-mRNA-1	1	GO:0005515
maker-tulip_contig_82_pilon_pilon-augustus-gene-1.31-mRNA-1	1	GO:0005634,GO:0006508,GO:0008233,GO:0006508,GO:0008233
maker-tulip_contig_481_pilon_pilon-augustus-gene-0.6-mRNA-1	1	GO:0000808,GO:0003677,GO:0005634,GO:0006260
maker-tulip_contig_192_pilon_pilon-augustus-gene-1.57-mRNA-1	1	GO:0005737,GO:0007349,GO:0016020,GO:0007155,GO:0051015
maker-tulip_contig_505_pilon_pilon-augustus-gene-0.0-mRNA-1	1	GO:0007064,GO:0031390
maker-tulip_contig_479_pilon_pilon-augustus-gene-2.2-mRNA-1	1	GO:0051225,GO:0070652
maker-tulip_contig_59_pilon_pilon-augustus-gene-1.32-mRNA-1	1	GO:0003677,GO:0008270,GO:0008168,GO:0003886,GO:0005634,GO:0090116,GO:0003682
maker-tulip_contig_145_pilon_pilon-augustus-gene-2.51-mRNA-1	1	GO:0005634
maker-tulip_contig_515_pilon_pilon-augustus-gene-2.1-mRNA-1	1
maker-tulip_contig_29_pilon_pilon-augustus-gene-1.30-mRNA-1	1	GO:0000278,GO:0004674,GO:0004672,GO:0006468,GO:0004672,GO:0005524,GO:0006468
maker-tulip_contig_76_pilon_pilon-augustus-gene-0.13-mRNA-1	1	GO:0000076,GO:0005634,GO:0006974,GO:0048478
augustus_masked-tulip_contig_307_pilon_pilon-processed-gene-1.29-mRNA-1	1	GO:0003676,GO:0005515
maker-tulip_contig_702_pilon_pilon-augustus-gene-0.95-mRNA-1	1	GO:0003676,GO:0004523,GO:0016070,GO:0004523,GO:0003723,GO:0004523
augustus_masked-tulip_contig_2_pilon_pilon-processed-gene-6.4-mRNA-1	1	GO:0003677,GO:0006260
maker-tulip_contig_327_pilon_pilon-augustus-gene-10.79-mRNA-1	1
maker-tulip_contig_272_pilon_pilon-augustus-gene-1.0-mRNA-1	1	GO:0005634,GO:0006260
maker-tulip_contig_731_pilon_pilon-augustus-gene-0.18-mRNA-1	1	GO:0000166,GO:0003676,GO:0003887,GO:0003676,GO:0001882,GO:0003887,GO:0006260,GO:0000166,GO:0003677
augustus_masked-tulip_contig_44_pilon_pilon-processed-gene-6.18-mRNA-1	1
maker-tulip_contig_321_pilon_pilon-augustus-gene-1.46-mRNA-1	1	GO:0006401,GO:0032299
augustus_masked-tulip_contig_907_pilon_pilon-processed-gene-2.53-mRNA-1	1	GO:0005634,GO:0006260
maker-tulip_contig_711_pilon_pilon-augustus-gene-2.32-mRNA-1	1
maker-tulip_contig_360_pilon_pilon-augustus-gene-1.17-mRNA-1	1	GO:0003682,GO:0005524
augustus_masked-tulip_contig_506_pilon_pilon-processed-gene-1.42-mRNA-1	1	GO:0003677,GO:0003899,GO:0006351,GO:0006351,GO:0003899,GO:0006351,GO:0032549,GO:0003899
augustus_masked-tulip_contig_399_pilon_pilon-processed-gene-0.18-mRNA-1	1	GO:0003676
augustus_masked-tulip_contig_234_pilon_pilon-processed-gene-4.25-mRNA-1	1
augustus_masked-tulip_contig_412_pilon_pilon-processed-gene-0.69-mRNA-1	1	GO:0003676
maker-tulip_contig_61_pilon_pilon-augustus-gene-0.41-mRNA-1	1	GO:0003824,GO:0008483,GO:0030170
maker-tulip_contig_759_pilon_pilon-augustus-gene-0.20-mRNA-1	1	GO:0016209,GO:0016491,GO:0055114,GO:0051920,GO:0055114,GO:0045454
maker-tulip_contig_161_pilon_pilon-augustus-gene-0.36-mRNA-1	1
augustus_masked-tulip_contig_290_pilon_pilon-processed-gene-5.60-mRNA-1	1	GO:0003677,GO:0003721
maker-tulip_contig_15_pilon_pilon-augustus-gene-2.35-mRNA-1	1	GO:0003700,GO:0006355,GO:0043565
augustus_masked-tulip_contig_616_pilon_pilon-processed-gene-0.48-mRNA-1	1	GO:0006281
maker-tulip_contig_829_pilon_pilon-augustus-gene-3.4-mRNA-1	1
augustus_masked-tulip_contig_290_pilon_pilon-processed-gene-5.73-mRNA-1	1	GO:0005615
maker-tulip_contig_234_pilon_pilon-augustus-gene-2.8-mRNA-1	1
maker-tulip_contig_216_pilon_pilon-augustus-gene-0.66-mRNA-1	1
maker-tulip_contig_407_pilon_pilon-augustus-gene-7.130-mRNA-1	1
augustus_masked-tulip_contig_628_pilon_pilon-processed-gene-4.15-mRNA-1	1	GO:0008641,GO:0019781,GO:0045116
augustus_masked-tulip_contig_360_pilon_pilon-processed-gene-1.5-mRNA-1	1	GO:0005515,GO:0005622,GO:0008270
augustus_masked-tulip_contig_498_pilon_pilon-processed-gene-0.86-mRNA-1	1	GO:0003677
augustus_masked-tulip_contig_290_pilon_pilon-processed-gene-1.39-mRNA-1	1	GO:0003676,GO:0005634,GO:0008270
maker-tulip_contig_145_pilon_pilon-augustus-gene-5.42-mRNA-1	1	GO:0003676
augustus_masked-tulip_contig_54_pilon_pilon-processed-gene-2.72-mRNA-1	1	GO:0004519,GO:0005634,GO:0006302,GO:0030145,GO:0016787,GO:0004519,GO:0006302,GO:0008408,GO:0030870
maker-tulip_contig_362_pilon_pilon-augustus-gene-1.40-mRNA-1	1	GO:0005515,GO:0043087,GO:0007165
maker-tulip_contig_523_pilon_pilon-augustus-gene-0.73-mRNA-1	1	GO:0004672,GO:0005524,GO:0006468,GO:0005524,GO:0004672,GO:0006468
maker-tulip_contig_606_pilon_pilon-augustus-gene-0.1-mRNA-1	1	GO:0005515,GO:0005524,GO:0005694,GO:0051276
maker-tulip_contig_407_pilon_pilon-augustus-gene-4.35-mRNA-1	1	GO:0003676,GO:0005634,GO:0008270
maker-tulip_contig_474_pilon_pilon-augustus-gene-0.104-mRNA-1	1	GO:0004672,GO:0005524,GO:0006468,GO:0005524,GO:0004672,GO:0006468
maker-tulip_contig_237_pilon_pilon-augustus-gene-0.45-mRNA-1	1	GO:0003677,GO:0004519,GO:0005622,GO:0006281,GO:0004518,GO:0006281
maker-tulip_contig_138_pilon_pilon-augustus-gene-0.35-mRNA-1	1	GO:0005515
maker-tulip_contig_236_pilon_pilon-augustus-gene-4.93-mRNA-1	1	GO:0003676,GO:0003677,GO:0005634,GO:0006260,GO:0006281,GO:0006310
augustus_masked-tulip_contig_280_pilon_pilon-processed-gene-1.8-mRNA-1	1	GO:0003676,GO:0005524
augustus_masked-tulip_contig_515_pilon_pilon-processed-gene-4.13-mRNA-1	1	GO:0004756,GO:0005524,GO:0016260,GO:0005524
maker-tulip_contig_43_pilon_pilon-augustus-gene-3.13-mRNA-1	1	GO:0003777,GO:0005524,GO:0007018,GO:0003777,GO:0007018,GO:0003777,GO:0005524,GO:0007018,GO:0008017
maker-tulip_contig_333_pilon_pilon-augustus-gene-3.127-mRNA-1	1
maker-tulip_contig_482_pilon_pilon-augustus-gene-4.16-mRNA-1	1	GO:0003777,GO:0005524,GO:0007018,GO:0008017,GO:0003777,GO:0007018
maker-tulip_contig_697_pilon_pilon-augustus-gene-2.6-mRNA-1	1
maker-tulip_contig_868_pilon_pilon-augustus-gene-0.59-mRNA-1	1	GO:0005515,GO:0007051
maker-tulip_contig_526_pilon_pilon-augustus-gene-0.11-mRNA-1	1	GO:0000796,GO:0007076
maker-tulip_contig_281_pilon_pilon-augustus-gene-3.24-mRNA-1	1
maker-tulip_contig_604_pilon_pilon-augustus-gene-2.4-mRNA-1	1
maker-tulip_contig_327_pilon_pilon-augustus-gene-9.25-mRNA-1	1
maker-tulip_contig_252_pilon_pilon-augustus-gene-1.16-mRNA-1	1	GO:0007093,GO:1990423
maker-tulip_contig_272_pilon_pilon-augustus-gene-5.35-mRNA-1	1
maker-tulip_contig_610_pilon_pilon-augustus-gene-0.17-mRNA-1	1
augustus_masked-tulip_contig_345_pilon_pilon-processed-gene-1.19-mRNA-1	1
maker-tulip_contig_343_pilon_pilon-augustus-gene-0.72-mRNA-1	1
maker-tulip_contig_181_pilon_pilon-augustus-gene-1.0-mRNA-1	1
augustus_masked-tulip_contig_270_pilon_pilon-processed-gene-3.179-mRNA-1	1	GO:0003677,GO:0003899,GO:0006351,GO:0006351,GO:0046983,GO:0003899,GO:0006351,GO:0046983,GO:0003899,GO:0006351
maker-tulip_contig_407_pilon_pilon-augustus-gene-0.40-mRNA-1	1	GO:0003676,GO:0046872
maker-tulip_contig_407_pilon_pilon-augustus-gene-7.101-mRNA-1	1	GO:0000339,GO:0005846,GO:0045292,GO:0003676
maker-tulip_contig_216_pilon_pilon-augustus-gene-0.48-mRNA-1	1	GO:0005515,GO:0035556
maker-tulip_contig_872_pilon_pilon-augustus-gene-0.23-mRNA-1	1	GO:0070461
maker-tulip_contig_424_pilon_pilon-augustus-gene-0.9-mRNA-1	1
maker-tulip_contig_303_pilon_pilon-augustus-gene-0.54-mRNA-1	1	GO:0003676
maker-tulip_contig_506_pilon_pilon-augustus-gene-1.104-mRNA-1	1	GO:0004482,GO:0004482,GO:0005634,GO:0006370
maker-tulip_contig_523_pilon_pilon-augustus-gene-0.65-mRNA-1	1	GO:0005515,GO:0018024
maker-tulip_contig_3_pilon_pilon-augustus-gene-4.26-mRNA-1	1	GO:0005515
maker-tulip_contig_505_pilon_pilon-augustus-gene-3.73-mRNA-1	1	GO:0003676
maker-tulip_contig_553_pilon_pilon-augustus-gene-0.91-mRNA-1	1	GO:0003723
augustus_masked-tulip_contig_827_pilon_pilon-processed-gene-2.6-mRNA-1	1
maker-tulip_contig_55_pilon_pilon-augustus-gene-0.75-mRNA-1	1
maker-tulip_contig_597_pilon_pilon-augustus-gene-3.4-mRNA-1	1
maker-tulip_contig_52_pilon_pilon-augustus-gene-2.0-mRNA-1	1
maker-tulip_contig_149_pilon_pilon-augustus-gene-0.4-mRNA-1	1
augustus_masked-tulip_contig_473_pilon_pilon-processed-gene-2.28-mRNA-1	1
maker-tulip_contig_320_pilon_pilon-augustus-gene-3.44-mRNA-1	1
augustus_masked-tulip_contig_211_pilon_pilon-processed-gene-2.83-mRNA-1	1
augustus_masked-tulip_contig_290_pilon_pilon-processed-gene-5.70-mRNA-1	1	GO:0006298,GO:0016887,GO:0032300,GO:0006298,GO:0032300
maker-tulip_contig_626_pilon_pilon-augustus-gene-0.8-mRNA-1	1	GO:0005515
maker-tulip_contig_704_pilon_pilon-augustus-gene-1.5-mRNA-1	1	GO:0003676
maker-tulip_contig_474_pilon_pilon-augustus-gene-1.62-mRNA-1	1	GO:0008270
maker-tulip_contig_527_pilon_pilon-augustus-gene-4.49-mRNA-1	1
maker-tulip_contig_807_pilon_pilon-augustus-gene-1.1-mRNA-1	1	GO:0000398,GO:0008270,GO:0005515,GO:0003676,GO:0008270,GO:0003676,GO:0005634,GO:0008270
augustus_masked-tulip_contig_422_pilon_pilon-processed-gene-0.9-mRNA-1	1	GO:0003677,GO:0006355,GO:0043565
maker-tulip_contig_81_pilon_pilon-augustus-gene-0.55-mRNA-1	1
maker-tulip_contig_45_pilon_pilon-augustus-gene-0.56-mRNA-1	1	GO:0003676,GO:0005515
maker-tulip_contig_185_pilon_pilon-augustus-gene-0.24-mRNA-1	1	GO:0005634,GO:0006338,GO:0006355,GO:0043486
augustus_masked-tulip_contig_281_pilon_pilon-processed-gene-1.68-mRNA-1	1	GO:0000381,GO:0005634,GO:0080009,GO:0005634,GO:0080009
maker-tulip_contig_527_pilon_pilon-augustus-gene-1.42-mRNA-1	1	GO:0005515,GO:0035064,GO:0005634,GO:0008270,GO:0005634,GO:0006355
maker-tulip_contig_361_pilon_pilon-augustus-gene-1.37-mRNA-1	1
augustus_masked-tulip_contig_333_pilon_pilon-processed-gene-3.35-mRNA-1	1	GO:0003676
maker-tulip_contig_372_pilon_pilon-augustus-gene-1.12-mRNA-1	1
maker-tulip_contig_199_pilon_pilon-augustus-gene-4.60-mRNA-1	1	GO:0003677
maker-tulip_contig_583_pilon_pilon-augustus-gene-2.38-mRNA-1	1	GO:0003676,GO:0005634,GO:0008270
maker-tulip_contig_270_pilon_pilon-augustus-gene-2.37-mRNA-1	1	GO:0003677
maker-tulip_contig_515_pilon_pilon-augustus-gene-1.59-mRNA-1	1	GO:0004519,GO:0005515
maker-tulip_contig_654_pilon_pilon-augustus-gene-1.79-mRNA-1	1
maker-tulip_contig_407_pilon_pilon-augustus-gene-4.20-mRNA-1	1
maker-tulip_contig_199_pilon_pilon-augustus-gene-3.59-mRNA-1	1	GO:0003676,GO:0008270
maker-tulip_contig_519_pilon_pilon-augustus-gene-2.39-mRNA-1	1	GO:0004672,GO:0005524,GO:0006468,GO:0005524,GO:0004672,GO:0006468
maker-tulip_contig_881_pilon_pilon-augustus-gene-1.49-mRNA-1	1	GO:0003676
maker-tulip_contig_37_pilon_pilon-augustus-gene-2.20-mRNA-1	1	GO:0008274,GO:0033566
augustus_masked-tulip_contig_546_pilon_pilon-processed-gene-0.57-mRNA-1	1
maker-tulip_contig_76_pilon_pilon-augustus-gene-0.11-mRNA-1	1	GO:0003712,GO:0006357,GO:0016592
maker-tulip_contig_477_pilon_pilon-augustus-gene-0.29-mRNA-1	1	GO:0008168
maker-tulip_contig_336_pilon_pilon-augustus-gene-0.120-mRNA-1	1	GO:0005515,GO:0005634,GO:0006355
maker-tulip_contig_812_pilon_pilon-augustus-gene-0.39-mRNA-1	1
maker-tulip_contig_498_pilon_pilon-augustus-gene-0.31-mRNA-1	1	GO:0003676,GO:0003899,GO:0006351
maker-tulip_contig_407_pilon_pilon-augustus-gene-5.21-mRNA-1	1
maker-tulip_contig_16_pilon_pilon-augustus-gene-0.10-mRNA-1	1	GO:0005515
augustus_masked-tulip_contig_862_pilon_pilon-processed-gene-1.0-mRNA-1	1
maker-tulip_contig_327_pilon_pilon-augustus-gene-9.28-mRNA-1	1
augustus_masked-tulip_contig_168_pilon_pilon-processed-gene-0.112-mRNA-1	1	GO:0003676,GO:0006351,GO:0008270,GO:0006379,GO:0006351
maker-tulip_contig_168_pilon_pilon-augustus-gene-0.43-mRNA-1	1
maker-tulip_contig_523_pilon_pilon-augustus-gene-0.127-mRNA-1	1	GO:0003712,GO:0006355,GO:0016592
augustus_masked-tulip_contig_298_pilon_pilon-processed-gene-0.4-mRNA-1	1
maker-tulip_contig_327_pilon_pilon-augustus-gene-9.1-mRNA-1	1	GO:0003676,GO:0005681,GO:0008270
augustus_masked-tulip_contig_276_pilon_pilon-processed-gene-3.84-mRNA-1	1	GO:0003676,GO:0008168,GO:0032259
maker-tulip_contig_247_pilon_pilon-augustus-gene-0.16-mRNA-1	1	GO:0004407,GO:0016575
maker-tulip_contig_327_pilon_pilon-augustus-gene-9.8-mRNA-1	1	GO:0006508,GO:0008233,GO:0016539,GO:0007267,GO:0007275,GO:0007267
maker-tulip_contig_159_pilon_pilon-augustus-gene-1.5-mRNA-1	1
maker-tulip_contig_531_pilon_pilon-augustus-gene-6.6-mRNA-1	1	GO:0046982
augustus_masked-tulip_contig_485_pilon_pilon-processed-gene-0.25-mRNA-1	1
maker-tulip_contig_236_pilon_pilon-augustus-gene-8.0-mRNA-1	1	GO:0000166,GO:0003824,GO:0044237,GO:0006352,GO:0030880
maker-tulip_contig_606_pilon_pilon-augustus-gene-0.8-mRNA-1	1
maker-tulip_contig_837_pilon_pilon-augustus-gene-6.24-mRNA-1	1
augustus_masked-tulip_contig_684_pilon_pilon-processed-gene-0.15-mRNA-1	1	GO:0005515
maker-tulip_contig_620_pilon_pilon-augustus-gene-0.51-mRNA-1	1
maker-tulip_contig_835_pilon_pilon-augustus-gene-0.2-mRNA-1	1	GO:0005634,GO:0006338
maker-tulip_contig_78_pilon_pilon-augustus-gene-0.27-mRNA-1	1	GO:0046982
maker-tulip_contig_807_pilon_pilon-augustus-gene-1.35-mRNA-1	1	GO:0004748,GO:0005524,GO:0006260,GO:0055114,GO:0055114,GO:0006260,GO:0055114
maker-tulip_contig_623_pilon_pilon-augustus-gene-1.36-mRNA-1	1	GO:0009263,GO:0055114,GO:0016491,GO:0055114
maker-tulip_contig_818_pilon_pilon-augustus-gene-0.27-mRNA-1	1
augustus_masked-tulip_contig_131_pilon_pilon-processed-gene-0.2-mRNA-1	1	GO:0003676,GO:0005634,GO:0006351,GO:0006355,GO:0006351,GO:0005634,GO:0003676,GO:0006351,GO:0008270
maker-tulip_contig_43_pilon_pilon-augustus-gene-6.27-mRNA-1	1
augustus_masked-tulip_contig_716_pilon_pilon-processed-gene-1.20-mRNA-1	1	GO:0005515,GO:0008285,GO:0005856
maker-tulip_contig_217_pilon_pilon-augustus-gene-3.45-mRNA-1	1	GO:0008270
augustus_masked-tulip_contig_498_pilon_pilon-processed-gene-0.111-mRNA-1	1	GO:0005643,GO:0016973
maker-tulip_contig_73_pilon_pilon-augustus-gene-0.67-mRNA-1	1
maker-tulip_contig_334_pilon_pilon-augustus-gene-0.59-mRNA-1	1	GO:0005524
maker-tulip_contig_800_pilon_pilon-augustus-gene-1.68-mRNA-1	1	GO:0003677,GO:0005524,GO:0006281,GO:0008094
augustus_masked-tulip_contig_584_pilon_pilon-processed-gene-3.86-mRNA-1	1	GO:0006351,GO:0016538,GO:0070985
augustus_masked-tulip_contig_465_pilon_pilon-processed-gene-0.107-mRNA-1	1	GO:0019888,GO:0030289
augustus_masked-tulip_contig_351_pilon_pilon-processed-gene-1.90-mRNA-1	1
maker-tulip_contig_375_pilon_pilon-augustus-gene-0.2-mRNA-1	1	GO:0007165
augustus_masked-tulip_contig_691_pilon_pilon-processed-gene-4.82-mRNA-1	1	GO:0003677,GO:0005634,GO:0006260,GO:0006281,GO:0006310
maker-tulip_contig_236_pilon_pilon-augustus-gene-0.47-mRNA-1	1	GO:0003676,GO:0003677,GO:0005634,GO:0006260,GO:0006281,GO:0006310,GO:0003677,GO:0005634,GO:0006260
maker-tulip_contig_831_pilon_pilon-augustus-gene-0.85-mRNA-1	1	GO:0005506,GO:0016705,GO:0020037,GO:0055114,GO:0016705,GO:0055114
maker-tulip_contig_121_pilon_pilon-augustus-gene-3.4-mRNA-1	1	GO:0005515
maker-tulip_contig_89_pilon_pilon-augustus-gene-0.15-mRNA-1	1	GO:0006479,GO:0008168
augustus_masked-tulip_contig_16_pilon_pilon-processed-gene-0.5-mRNA-1	1	GO:0003676
maker-tulip_contig_819_pilon_pilon-augustus-gene-1.6-mRNA-1	1
maker-tulip_contig_317_pilon_pilon-augustus-gene-1.22-mRNA-1	1	GO:0003676
maker-tulip_contig_59_pilon_pilon-augustus-gene-2.31-mRNA-1	1	GO:0003725,GO:0008047,GO:0030422
maker-tulip_contig_862_pilon_pilon-augustus-gene-1.66-mRNA-1	1	GO:0005515
maker-tulip_contig_666_pilon_pilon-augustus-gene-0.34-mRNA-1	1	GO:0003950
maker-tulip_contig_218_pilon_pilon-augustus-gene-1.122-mRNA-1	1	GO:0003677,GO:0005664,GO:0006260
maker-tulip_contig_659_pilon_pilon-augustus-gene-1.39-mRNA-1	1	GO:0045454
maker-tulip_contig_523_pilon_pilon-augustus-gene-0.74-mRNA-1	1	GO:0004672,GO:0005524,GO:0006468
maker-tulip_contig_323_pilon_pilon-augustus-gene-8.40-mRNA-1	1	GO:0045454
augustus_masked-tulip_contig_252_pilon_pilon-processed-gene-0.46-mRNA-1	1	GO:0005515,GO:0016571,GO:0035098
maker-tulip_contig_281_pilon_pilon-augustus-gene-3.18-mRNA-1	1	GO:0003676
maker-tulip_contig_234_pilon_pilon-augustus-gene-0.1-mRNA-1	1	GO:0017053
maker-tulip_contig_610_pilon_pilon-augustus-gene-0.18-mRNA-1	1
maker-tulip_contig_464_pilon_pilon-augustus-gene-0.13-mRNA-1	1
augustus_masked-tulip_contig_287_pilon_pilon-processed-gene-1.157-mRNA-1	1	GO:0006281,GO:0006974
augustus_masked-tulip_contig_222_pilon_pilon-processed-gene-0.2-mRNA-1	1	GO:0042981
maker-tulip_contig_506_pilon_pilon-augustus-gene-1.168-mRNA-1	1	GO:0003677,GO:0006260,GO:0005524
augustus_masked-tulip_contig_916_pilon_pilon-processed-gene-3.13-mRNA-1	1
maker-tulip_contig_59_pilon_pilon-augustus-gene-0.51-mRNA-1	1	GO:0007219,GO:0008417
maker-tulip_contig_89_pilon_pilon-augustus-gene-3.17-mRNA-1	1	GO:0003677,GO:0003918,GO:0005524,GO:0003918,GO:0005524,GO:0003677,GO:0003918,GO:0005524,GO:0006265,GO:0003677,GO:0003918,GO:0005524,GO:0006259,GO:0006265
augustus_masked-tulip_contig_514_pilon_pilon-processed-gene-1.45-mRNA-1	1	GO:0003676
augustus_masked-tulip_contig_257_pilon_pilon-processed-gene-0.39-mRNA-1	1	GO:0005515
maker-tulip_contig_320_pilon_pilon-augustus-gene-1.0-mRNA-1	1
maker-tulip_contig_280_pilon_pilon-augustus-gene-0.15-mRNA-1	1	GO:0006281
augustus_masked-tulip_contig_222_pilon_pilon-processed-gene-0.1-mRNA-1	1
maker-tulip_contig_388_pilon_pilon-augustus-gene-0.53-mRNA-1	1	GO:0005515,GO:0005680
maker-tulip_contig_455_pilon_pilon-augustus-gene-1.24-mRNA-1	1	GO:0005815
maker-tulip_contig_767_pilon_pilon-augustus-gene-0.58-mRNA-1	1	GO:0000213,GO:0000214,GO:0006388,GO:0003676,GO:0004518,GO:0000213,GO:0006388
augustus_masked-tulip_contig_318_pilon_pilon-processed-gene-0.79-mRNA-1	1	GO:0000724,GO:0005657,GO:0006281,GO:0033063
maker-tulip_contig_441_pilon_pilon-augustus-gene-4.25-mRNA-1	1
maker-tulip_contig_35_pilon_pilon-augustus-gene-0.104-mRNA-1	1
augustus_masked-tulip_contig_360_pilon_pilon-processed-gene-1.3-mRNA-1	1	GO:0006464,GO:0008641,GO:0008641
maker-tulip_contig_236_pilon_pilon-augustus-gene-0.45-mRNA-1	1	GO:0000723,GO:0005634,GO:0006281,GO:0016887,GO:0030870
maker-tulip_contig_870_pilon_pilon-augustus-gene-4.109-mRNA-1	1	GO:0003677,GO:0003887,GO:0006260
maker-tulip_contig_336_pilon_pilon-augustus-gene-0.65-mRNA-1	1	GO:0004672,GO:0005524,GO:0006468,GO:0005675,GO:0008353,GO:0070985,GO:0005524,GO:0004672,GO:0006468
augustus_masked-tulip_contig_390_pilon_pilon-processed-gene-0.25-mRNA-1	1	GO:0005524,GO:0016881,GO:0045116,GO:0019781,GO:0045116,GO:0016881,GO:0008641
maker-tulip_contig_252_pilon_pilon-augustus-gene-0.12-mRNA-1	1
maker-tulip_contig_773_pilon_pilon-augustus-gene-2.36-mRNA-1	1
maker-tulip_contig_15_pilon_pilon-augustus-gene-2.17-mRNA-1	1
augustus_masked-tulip_contig_515_pilon_pilon-processed-gene-2.54-mRNA-1	1
maker-tulip_contig_701_pilon_pilon-augustus-gene-0.25-mRNA-1	1	GO:0006355,GO:0008270,GO:0006355,GO:0008270,GO:0043565
maker-tulip_contig_72_pilon_pilon-augustus-gene-0.48-mRNA-1	1	GO:0005634,GO:0006915
maker-tulip_contig_336_pilon_pilon-augustus-gene-0.87-mRNA-1	1
maker-tulip_contig_44_pilon_pilon-augustus-gene-1.2-mRNA-1	1	GO:0003677,GO:0005524,GO:0006270
augustus_masked-tulip_contig_799_pilon_pilon-processed-gene-0.123-mRNA-1	1	GO:0016740
maker-tulip_contig_33_pilon_pilon-augustus-gene-2.6-mRNA-1	1	GO:0000413,GO:0003755,GO:0003755,GO:0006457,GO:0003755
augustus_masked-tulip_contig_384_pilon_pilon-processed-gene-0.109-mRNA-1	1
maker-tulip_contig_693_pilon_pilon-augustus-gene-1.18-mRNA-1	1	GO:0005509,GO:0007156,GO:0016020,GO:0005886,GO:0007155,GO:0005509,GO:0016020
maker-tulip_contig_507_pilon_pilon-augustus-gene-0.32-mRNA-1	1	GO:0004066,GO:0006529
maker-tulip_contig_819_pilon_pilon-augustus-gene-0.52-mRNA-1	1	GO:0000123,GO:0016573
maker-tulip_contig_387_pilon_pilon-augustus-gene-1.71-mRNA-1	1	GO:0003676
maker-tulip_contig_677_pilon_pilon-augustus-gene-0.4-mRNA-1	1	GO:0006338,GO:0031011,GO:0031011
maker-tulip_contig_351_pilon_pilon-augustus-gene-1.6-mRNA-1	1	GO:0005515
augustus_masked-tulip_contig_324_pilon_pilon-processed-gene-0.22-mRNA-1	1
maker-tulip_contig_420_pilon_pilon-augustus-gene-2.43-mRNA-1	1	GO:0005515,GO:0008270,GO:0005634,GO:0006355
augustus_masked-tulip_contig_281_pilon_pilon-processed-gene-3.59-mRNA-1	1
maker-tulip_contig_843_pilon_pilon-augustus-gene-9.53-mRNA-1	1
maker-tulip_contig_167_pilon_pilon-augustus-gene-0.49-mRNA-1	1	GO:0003676,GO:0005634,GO:0008270
augustus_masked-tulip_contig_290_pilon_pilon-processed-gene-1.38-mRNA-1	1	GO:0003676,GO:0005634,GO:0008270
maker-tulip_contig_583_pilon_pilon-augustus-gene-2.58-mRNA-1	1	GO:0003677
maker-tulip_contig_281_pilon_pilon-augustus-gene-3.15-mRNA-1	1	GO:0003824,GO:0005975,GO:0006030,GO:0008061,GO:0005576,GO:0006030,GO:0008061,GO:0005515
augustus_masked-tulip_contig_132_pilon_pilon-processed-gene-1.15-mRNA-1	1	GO:0003676,GO:0003677
augustus_masked-tulip_contig_290_pilon_pilon-processed-gene-5.49-mRNA-1	1	GO:0003677,GO:0006355,GO:0043565
augustus_masked-tulip_contig_190_pilon_pilon-processed-gene-2.36-mRNA-1	1	GO:0000808,GO:0005634,GO:0006260
maker-tulip_contig_234_pilon_pilon-augustus-gene-5.20-mRNA-1	1
augustus_masked-tulip_contig_620_pilon_pilon-processed-gene-0.35-mRNA-1	1
maker-tulip_contig_35_pilon_pilon-augustus-gene-0.16-mRNA-1	1
maker-tulip_contig_192_pilon_pilon-augustus-gene-0.12-mRNA-1	1	GO:0003676
augustus_masked-tulip_contig_394_pilon_pilon-processed-gene-1.22-mRNA-1	1	GO:0016591
augustus_masked-tulip_contig_714_pilon_pilon-processed-gene-0.91-mRNA-1	1	GO:0005515
augustus_masked-tulip_contig_653_pilon_pilon-processed-gene-0.160-mRNA-1	1
augustus_masked-tulip_contig_711_pilon_pilon-processed-gene-0.4-mRNA-1	1
maker-tulip_contig_515_pilon_pilon-augustus-gene-2.8-mRNA-1	1	GO:0003677,GO:0006355
maker-tulip_contig_43_pilon_pilon-augustus-gene-5.14-mRNA-1	1	GO:0045322,GO:0048188
maker-tulip_contig_691_pilon_pilon-augustus-gene-0.13-mRNA-1	1	GO:0003676
maker-tulip_contig_546_pilon_pilon-augustus-gene-0.16-mRNA-1	1	GO:0003700,GO:0005667,GO:0006355,GO:0046983
maker-tulip_contig_407_pilon_pilon-augustus-gene-1.73-mRNA-1	1	GO:0005634,GO:0006511,GO:0007275
maker-tulip_contig_507_pilon_pilon-augustus-gene-0.77-mRNA-1	1	GO:0005515,GO:0005680,GO:0030071
augustus_masked-tulip_contig_159_pilon_pilon-processed-gene-0.0-mRNA-1	1
augustus_masked-tulip_contig_323_pilon_pilon-processed-gene-5.10-mRNA-1	1	GO:0005515
maker-tulip_contig_112_pilon_pilon-augustus-gene-2.27-mRNA-1	1
augustus_masked-tulip_contig_221_pilon_pilon-processed-gene-0.6-mRNA-1	1	GO:0003677,GO:0005515
maker-tulip_contig_759_pilon_pilon-augustus-gene-1.63-mRNA-1	1	GO:0045739,GO:0070531,GO:0070552
maker-tulip_contig_407_pilon_pilon-augustus-gene-6.55-mRNA-1	1	GO:0004518,GO:0004518,GO:0006281
maker-tulip_contig_759_pilon_pilon-augustus-gene-1.58-mRNA-1	1	GO:0003676,GO:0003887,GO:0006261,GO:0003887,GO:0006260,GO:0003677,GO:0003887,GO:0006260,GO:0003676,GO:0005524
maker-tulip_contig_236_pilon_pilon-augustus-gene-4.50-mRNA-1	1
maker-tulip_contig_361_pilon_pilon-augustus-gene-1.56-mRNA-1	1
augustus_masked-tulip_contig_583_pilon_pilon-processed-gene-2.9-mRNA-1	1	GO:0003676
maker-tulip_contig_292_pilon_pilon-augustus-gene-1.14-mRNA-1	1	GO:0003676,GO:0005634,GO:0008270
maker-tulip_contig_537_pilon_pilon-augustus-gene-3.1-mRNA-1	1	GO:0003700,GO:0005622,GO:0005667,GO:0006355,GO:0007179,GO:0007179,GO:0005622,GO:0006355,GO:0005515
maker-tulip_contig_217_pilon_pilon-augustus-gene-4.33-mRNA-1	1
maker-tulip_contig_800_pilon_pilon-augustus-gene-1.25-mRNA-1	1
augustus_masked-tulip_contig_343_pilon_pilon-processed-gene-0.81-mRNA-1	1
maker-tulip_contig_236_pilon_pilon-augustus-gene-7.46-mRNA-1	1	GO:0003723,GO:0008168,GO:0003723,GO:0008168
maker-tulip_contig_211_pilon_pilon-augustus-gene-2.45-mRNA-1	1	GO:0005739,GO:0047631,GO:0016787
maker-tulip_contig_640_pilon_pilon-augustus-gene-1.35-mRNA-1	1
augustus_masked-tulip_contig_843_pilon_pilon-processed-gene-0.20-mRNA-1	1	GO:0005669,GO:0046982
maker-tulip_contig_402_pilon_pilon-augustus-gene-1.12-mRNA-1	1	GO:0003676
maker-tulip_contig_334_pilon_pilon-augustus-gene-1.15-mRNA-1	1
maker-tulip_contig_342_pilon_pilon-augustus-gene-0.12-mRNA-1	1	GO:0005634,GO:0006915
maker-tulip_contig_281_pilon_pilon-augustus-gene-1.26-mRNA-1	1
maker-tulip_contig_30_pilon_pilon-augustus-gene-0.40-mRNA-1	1	GO:0003723,GO:0016779,GO:0031123,GO:0016779,GO:0004652,GO:0043631,GO:0004652,GO:0005634,GO:0043631,GO:0003723,GO:0043631
maker-tulip_contig_149_pilon_pilon-augustus-gene-0.9-mRNA-1	1	GO:0046982
maker-tulip_contig_628_pilon_pilon-augustus-gene-4.60-mRNA-1	1	GO:0005669,GO:0046982
maker-tulip_contig_402_pilon_pilon-augustus-gene-1.21-mRNA-1	1	GO:0003676
augustus_masked-tulip_contig_916_pilon_pilon-processed-gene-0.34-mRNA-1	1	GO:0003676,GO:0003700,GO:0006357
maker-tulip_contig_147_pilon_pilon-augustus-gene-0.79-mRNA-1	1	GO:0003712,GO:0006357,GO:0016592
augustus_masked-tulip_contig_55_pilon_pilon-processed-gene-1.23-mRNA-1	1
maker-tulip_contig_623_pilon_pilon-augustus-gene-4.58-mRNA-1	1	GO:0003676,GO:0005634,GO:0008270
maker-tulip_contig_331_pilon_pilon-augustus-gene-3.20-mRNA-1	1	GO:0004252,GO:0006508
maker-tulip_contig_353_pilon_pilon-augustus-gene-0.12-mRNA-1	1	GO:0004672,GO:0005524,GO:0006468,GO:0005524
maker-tulip_contig_318_pilon_pilon-augustus-gene-0.24-mRNA-1	1	GO:0005524
maker-tulip_contig_216_pilon_pilon-augustus-gene-0.60-mRNA-1	1
maker-tulip_contig_506_pilon_pilon-augustus-gene-1.74-mRNA-1	1
maker-tulip_contig_553_pilon_pilon-augustus-gene-0.81-mRNA-1	1	GO:0000287,GO:0004523,GO:0003676,GO:0004523,GO:0003676
maker-tulip_contig_843_pilon_pilon-augustus-gene-9.73-mRNA-1	1
augustus_masked-tulip_contig_55_pilon_pilon-processed-gene-0.13-mRNA-1	1	GO:0004659,GO:0016021,GO:0016765
maker-tulip_contig_217_pilon_pilon-augustus-gene-1.161-mRNA-1	1	GO:0003677,GO:0006281
maker-tulip_contig_353_pilon_pilon-augustus-gene-0.19-mRNA-1	1	GO:0003676
maker-tulip_contig_276_pilon_pilon-augustus-gene-1.5-mRNA-1	1	GO:0003676
augustus_masked-tulip_contig_290_pilon_pilon-processed-gene-5.58-mRNA-1	1	GO:0003677
maker-tulip_contig_321_pilon_pilon-augustus-gene-1.20-mRNA-1	1	GO:0003676
augustus_masked-tulip_contig_131_pilon_pilon-processed-gene-0.25-mRNA-1	1
maker-tulip_contig_407_pilon_pilon-augustus-gene-0.33-mRNA-1	1
maker-tulip_contig_843_pilon_pilon-augustus-gene-9.43-mRNA-1	1
augustus_masked-tulip_contig_300_pilon_pilon-processed-gene-0.3-mRNA-1	1
augustus_masked-tulip_contig_626_pilon_pilon-processed-gene-1.3-mRNA-1	1
maker-tulip_contig_661_pilon_pilon-augustus-gene-1.10-mRNA-1	1	GO:0003677,GO:0006260,GO:0005524,GO:0003689,GO:0005524,GO:0005663,GO:0006260,GO:0006281,GO:0003689,GO:0005524,GO:0005663,GO:0006260
maker-tulip_contig_29_pilon_pilon-augustus-gene-1.68-mRNA-1	1	GO:0005515,GO:0034773,GO:0042799
maker-tulip_contig_384_pilon_pilon-augustus-gene-0.78-mRNA-1	1	GO:0005515
maker-tulip_contig_837_pilon_pilon-augustus-gene-9.42-mRNA-1	1	GO:0003676,GO:0005777,GO:0010468
maker-tulip_contig_628_pilon_pilon-augustus-gene-0.0-mRNA-1	1	GO:0000184
maker-tulip_contig_160_pilon_pilon-augustus-gene-0.4-mRNA-1	1	GO:0000278,GO:0000775,GO:0005634
maker-tulip_contig_216_pilon_pilon-augustus-gene-0.26-mRNA-1	1	GO:0005515
maker-tulip_contig_402_pilon_pilon-augustus-gene-2.30-mRNA-1	1	GO:0003676,GO:0005634,GO:0008270
augustus_masked-tulip_contig_59_pilon_pilon-processed-gene-1.2-mRNA-1	1	GO:0003676
maker-tulip_contig_516_pilon_pilon-augustus-gene-3.40-mRNA-1	1	GO:0006281,GO:0017108,GO:0033557
maker-tulip_contig_236_pilon_pilon-augustus-gene-7.91-mRNA-1	1	GO:0005634,GO:0006338,GO:0031011
augustus_masked-tulip_contig_619_pilon_pilon-processed-gene-1.51-mRNA-1	1	GO:0003676
maker-tulip_contig_610_pilon_pilon-augustus-gene-3.29-mRNA-1	1	GO:0003723
augustus_masked-tulip_contig_145_pilon_pilon-processed-gene-4.8-mRNA-1	1	GO:0006351,GO:0017053
maker-tulip_contig_77_pilon_pilon-augustus-gene-0.98-mRNA-1	1	GO:0017183
maker-tulip_contig_353_pilon_pilon-augustus-gene-0.11-mRNA-1	1	GO:0004672,GO:0005524,GO:0006468,GO:0005524,GO:0004672,GO:0006468
maker-tulip_contig_56_pilon_pilon-augustus-gene-0.49-mRNA-1	1
augustus_masked-tulip_contig_40_pilon_pilon-processed-gene-0.43-mRNA-1	1	GO:0003676,GO:0005524,GO:0006310,GO:0008026,GO:0003676,GO:0008270
maker-tulip_contig_909_pilon_pilon-augustus-gene-0.16-mRNA-1	1
maker-tulip_contig_260_pilon_pilon-augustus-gene-0.3-mRNA-1	1
augustus_masked-tulip_contig_773_pilon_pilon-processed-gene-1.16-mRNA-1	1
augustus_masked-tulip_contig_473_pilon_pilon-processed-gene-1.2-mRNA-1	1	GO:0003676
augustus_masked-tulip_contig_63_pilon_pilon-processed-gene-0.5-mRNA-1	1	GO:0005515,GO:0005524,GO:0005694,GO:0051276
maker-tulip_contig_327_pilon_pilon-augustus-gene-0.3-mRNA-1	1	GO:0046872
augustus_masked-tulip_contig_424_pilon_pilon-processed-gene-2.106-mRNA-1	1
maker-tulip_contig_192_pilon_pilon-augustus-gene-0.5-mRNA-1	1
maker-tulip_contig_234_pilon_pilon-augustus-gene-2.21-mRNA-1	1
maker-tulip_contig_507_pilon_pilon-augustus-gene-0.65-mRNA-1	1
[truncated: 7,898 more rows]
